# Supplementary material
Source: PubMed Central journal article supplement (PMC3271135)

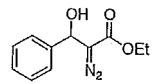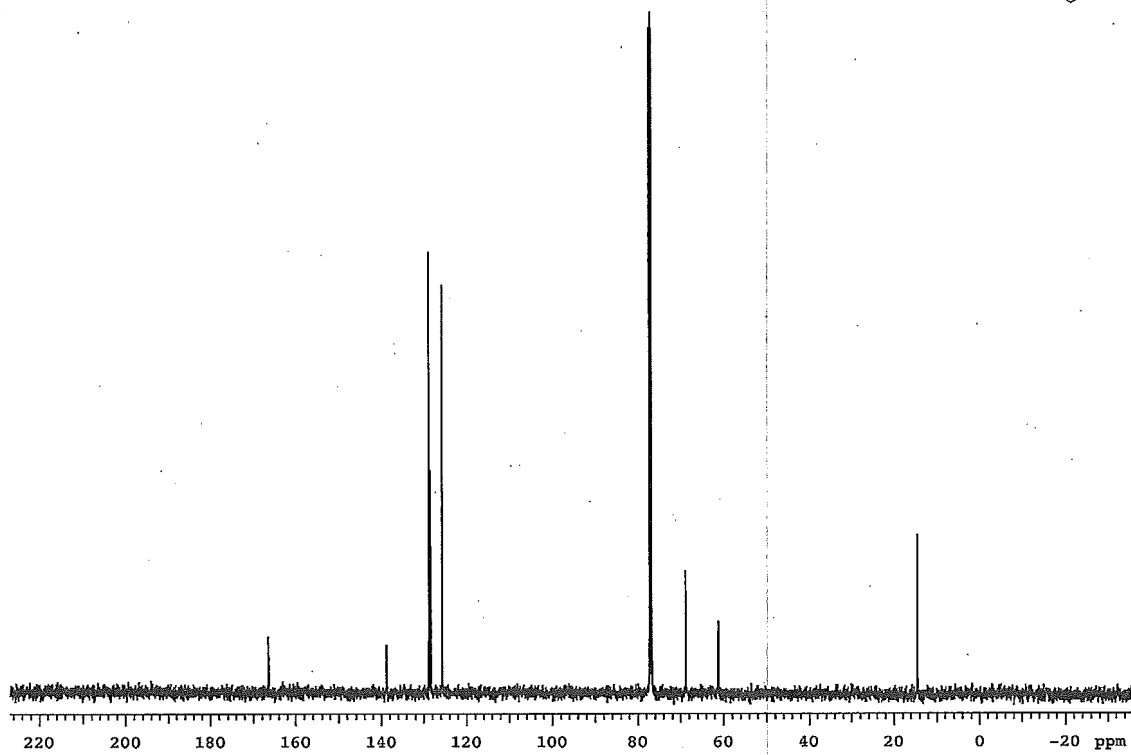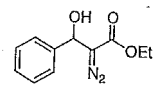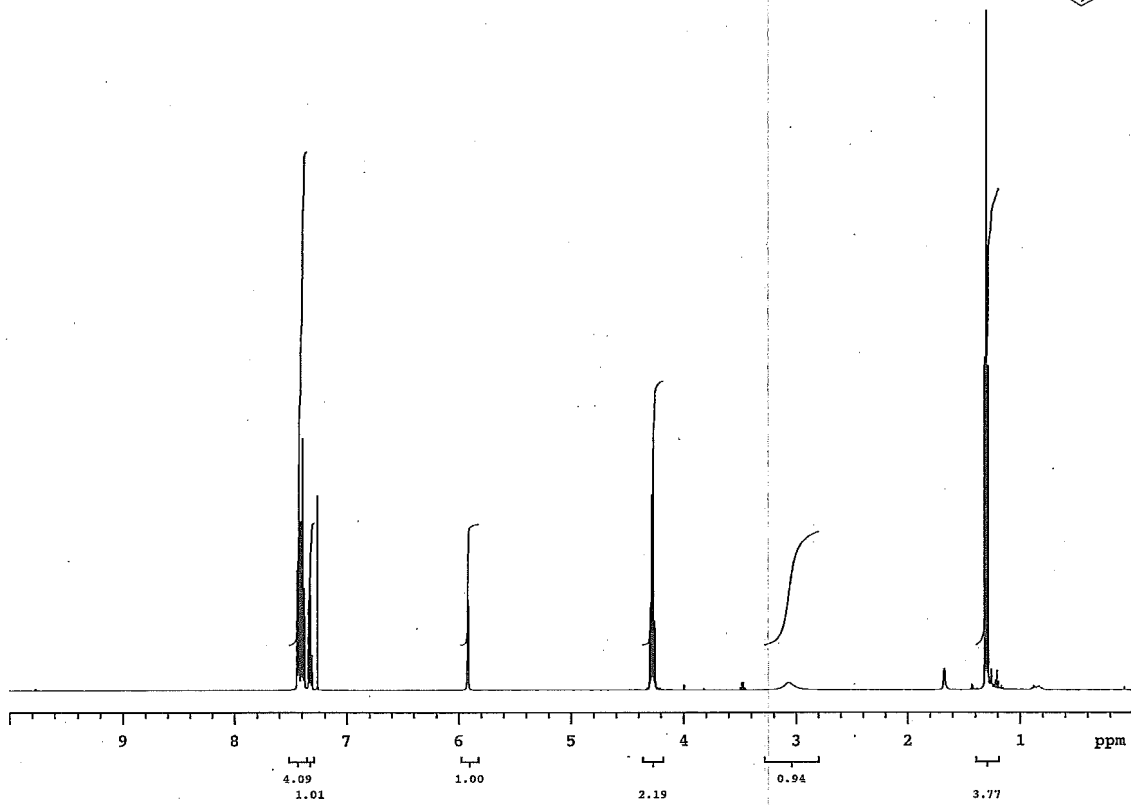

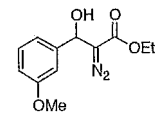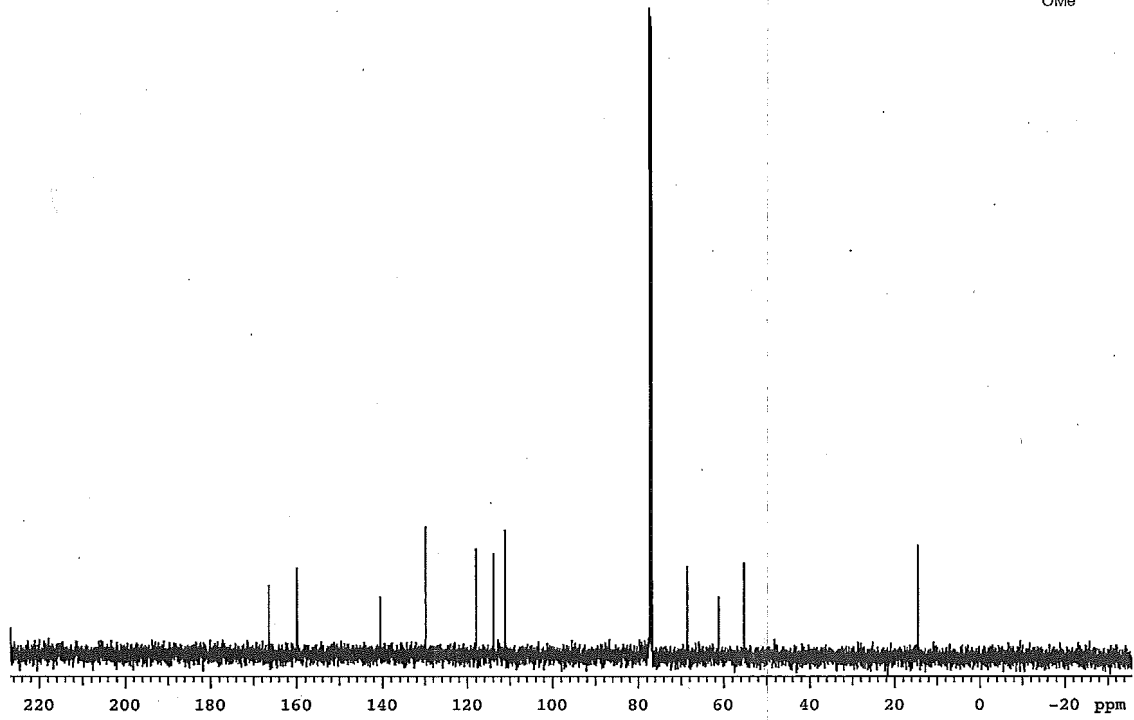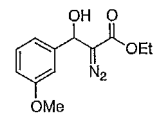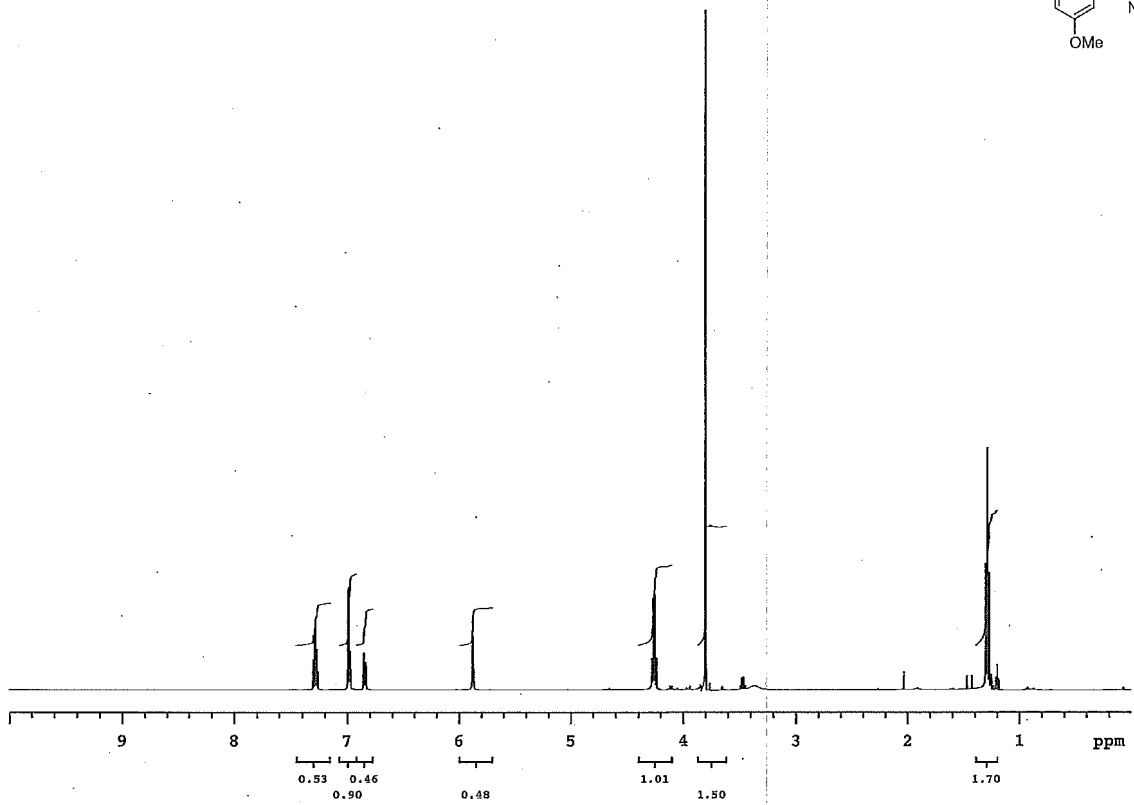

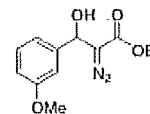

Stanford University Chemistry Department  
Trost Lab HPLC Report

Data File: c:\star\data\asc\me-ii-71-ad-97.3-220      Sample Prep Info  
 Injection Date: 11/08/2009 04:33:52      Manual Injection  
 Injection Method: c:\star\data\asc\chiral right method  
 Run Time (min): 42.807  
 Instrument (Inj): Chiral LC Right

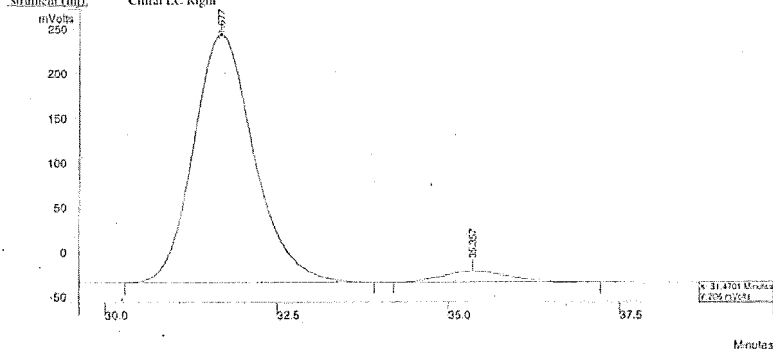

| Peak No | Ret. Time (min) | Peak Area | Width 1/2 (sec) | Percent Area |
|---------|-----------------|-----------|-----------------|--------------|
| 1       | 31.677          | 17039294  | 58.3            | 95.46        |
| 2       | 35.357          | 810603    | 61.6            | 4.54         |
|         |                 | 17849296  |                 | 100.00       |

AD, 97.3 Hept-PrOH, 220nm, 0.8 ml/min

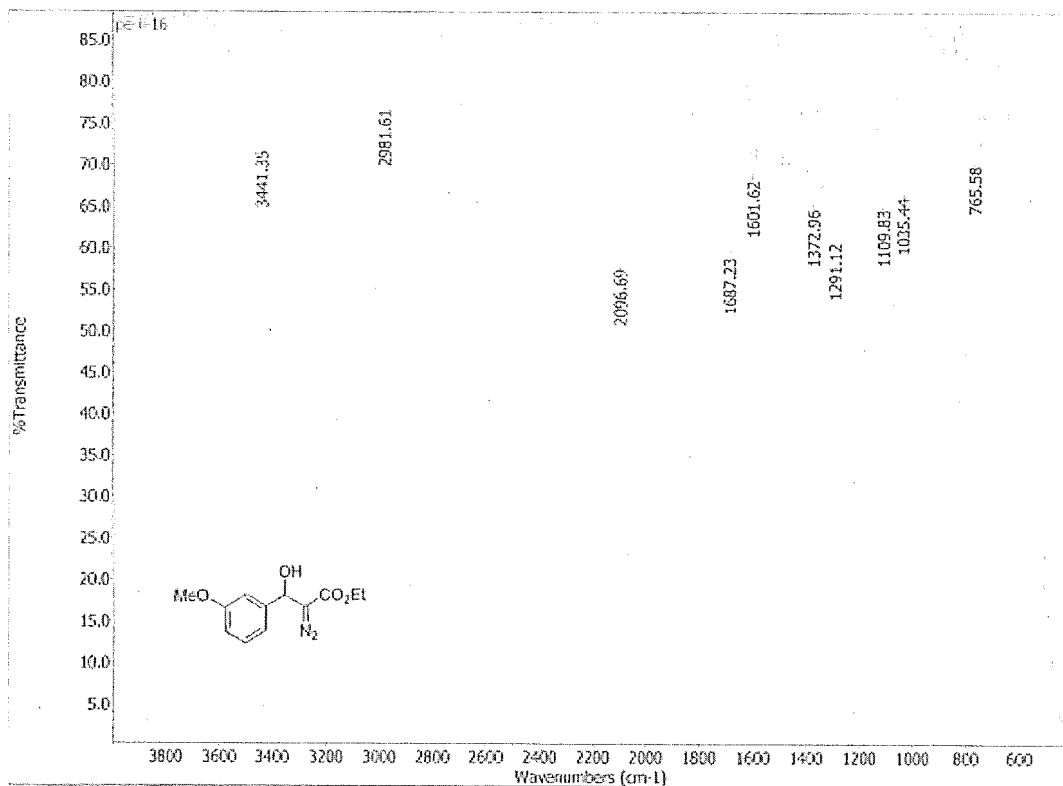

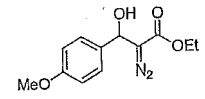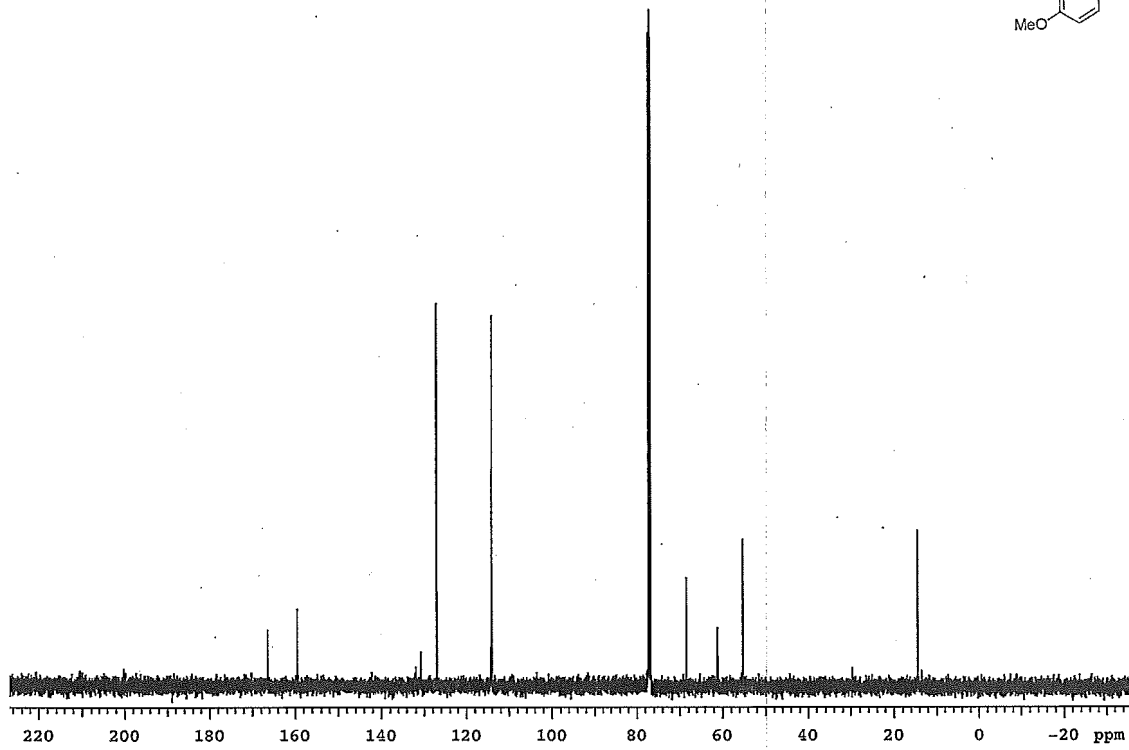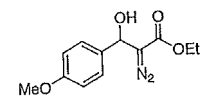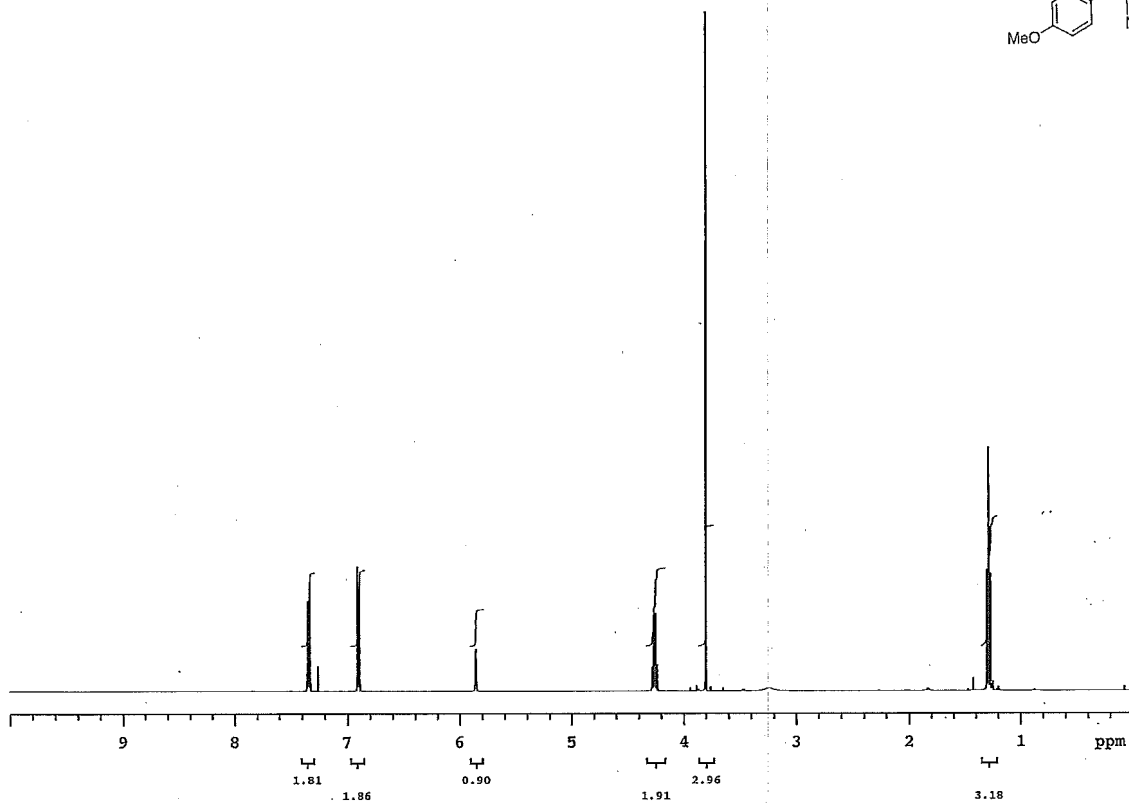

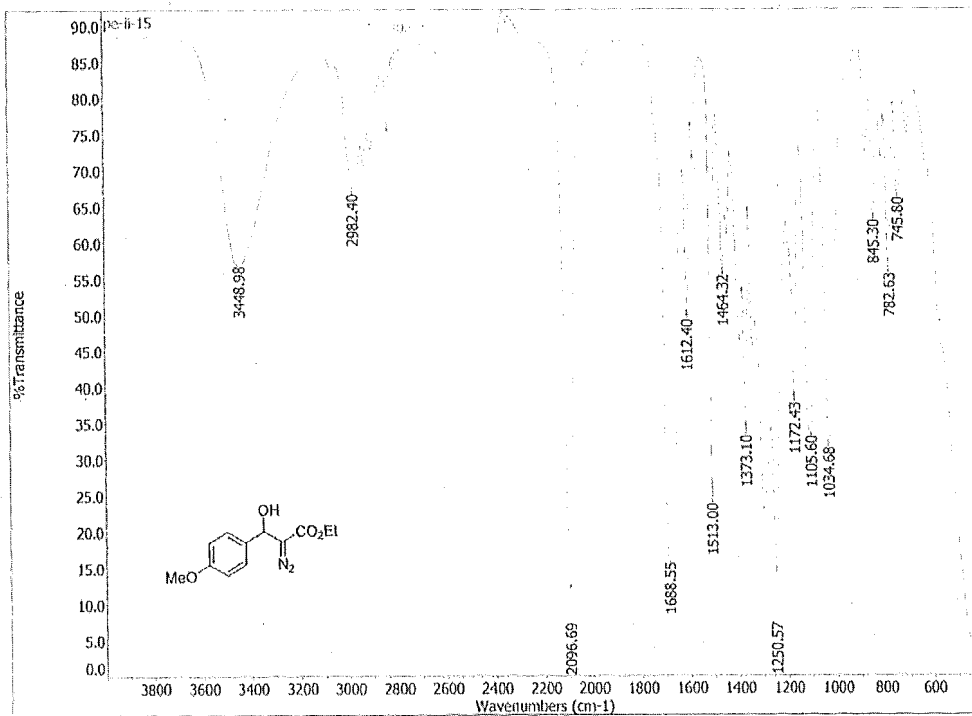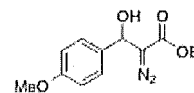

Stanford University Chemistry Department  
Trost Lab HPLC Report

File: c:\star\data\msc\ne-H-89-nd-97.3.220. Sample Prep Info  
 Injection Date: 11/17/2009 03:37:43 Manual Injection  
 Injection Method: v:\star\data\david\chiral right method  
 Run Time (min): 35.190  
 Instrument (In): Chiral LC Right

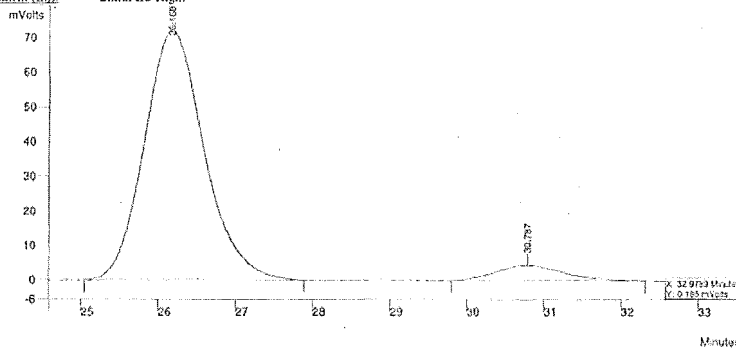

| Peak No | Ret. Time (min) | Peak Area | Width I/2 (sec) | Percent Area |
|---------|-----------------|-----------|-----------------|--------------|
| 1       | 26.168          | 3861841   | 50.7            | 93.76        |
| 2       | 30.787          | 256802    | 57.1            | 6.24         |
|         |                 | 4118643   |                 | 100.00       |

AD, 97:3 Hept:IPrOH, 220nm, 1.0 ml/min

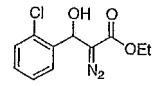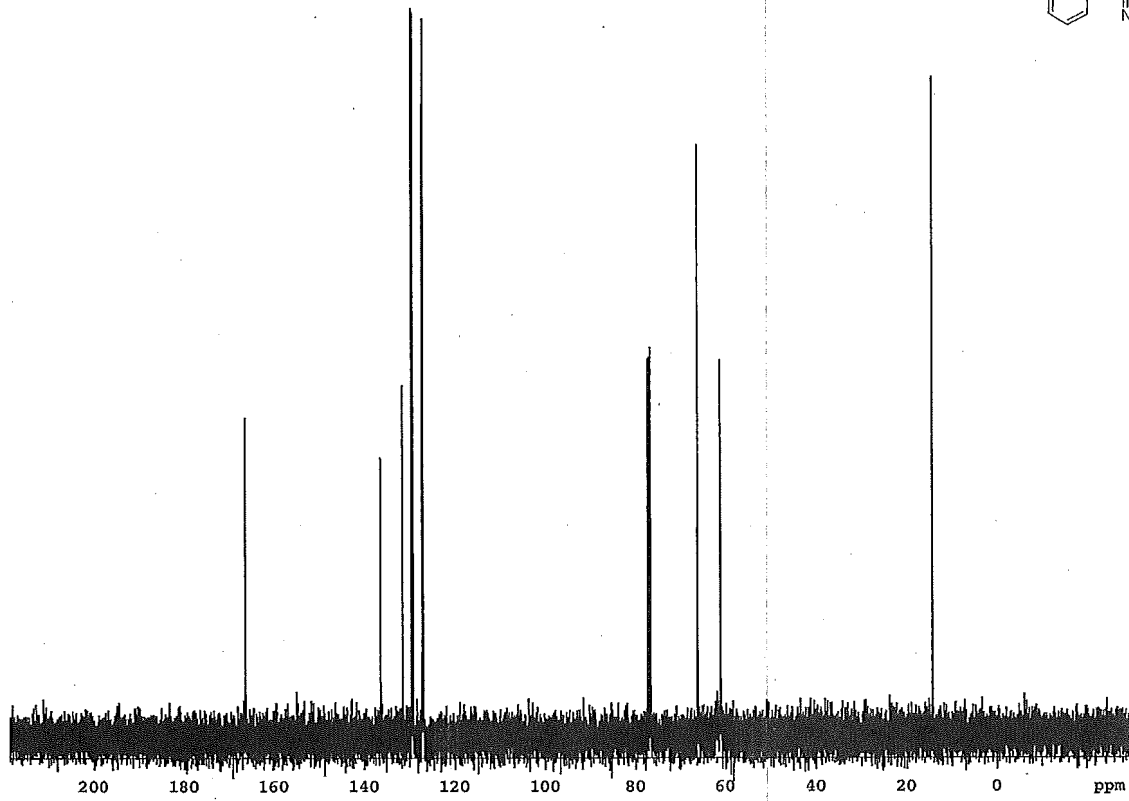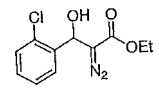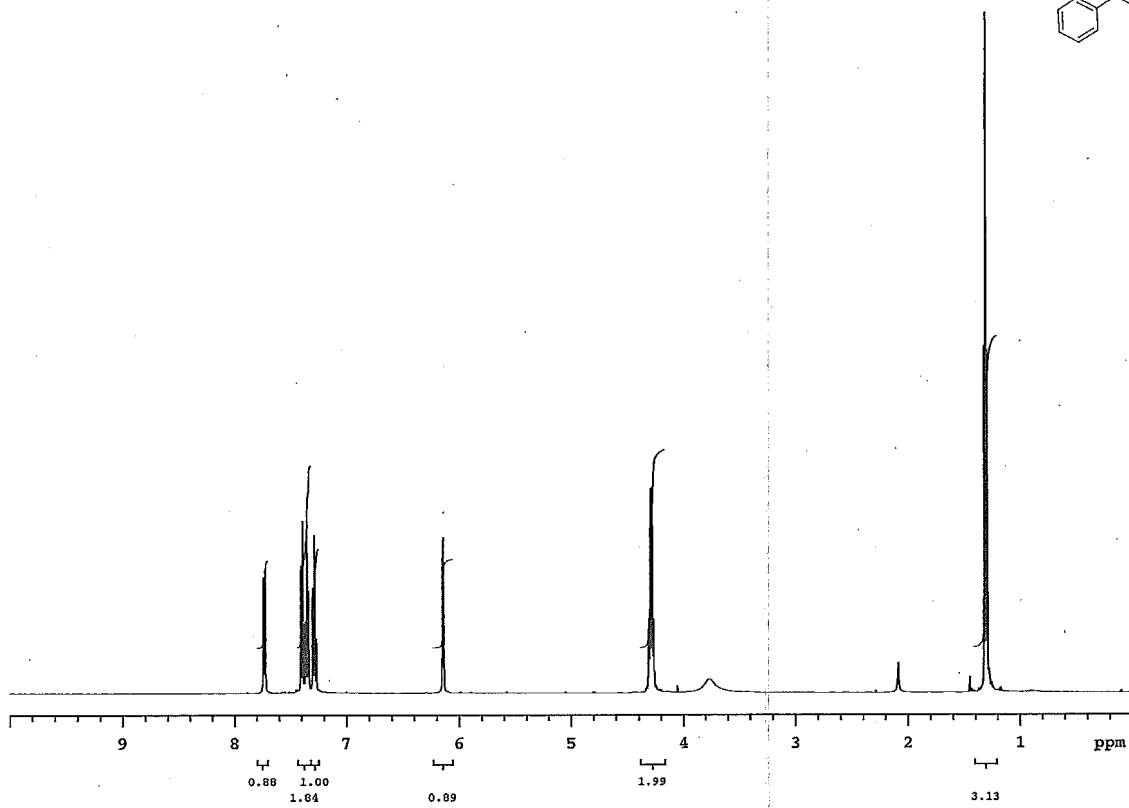

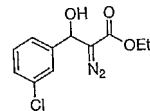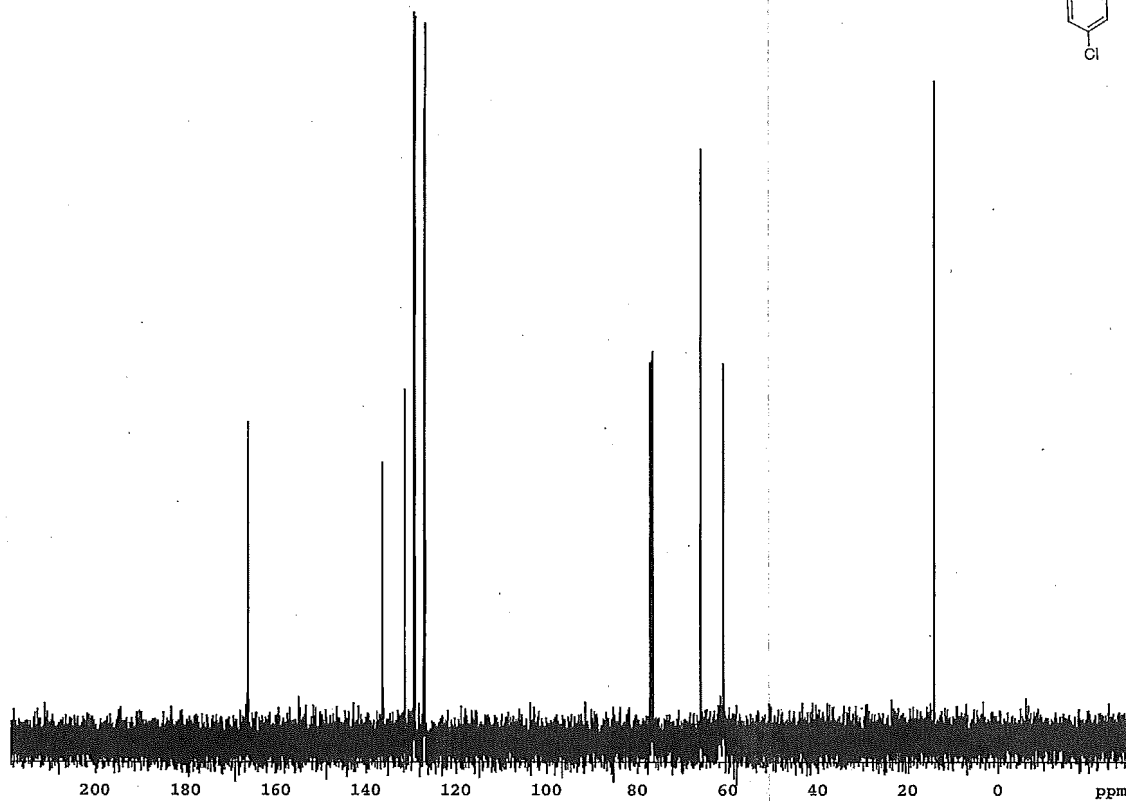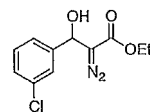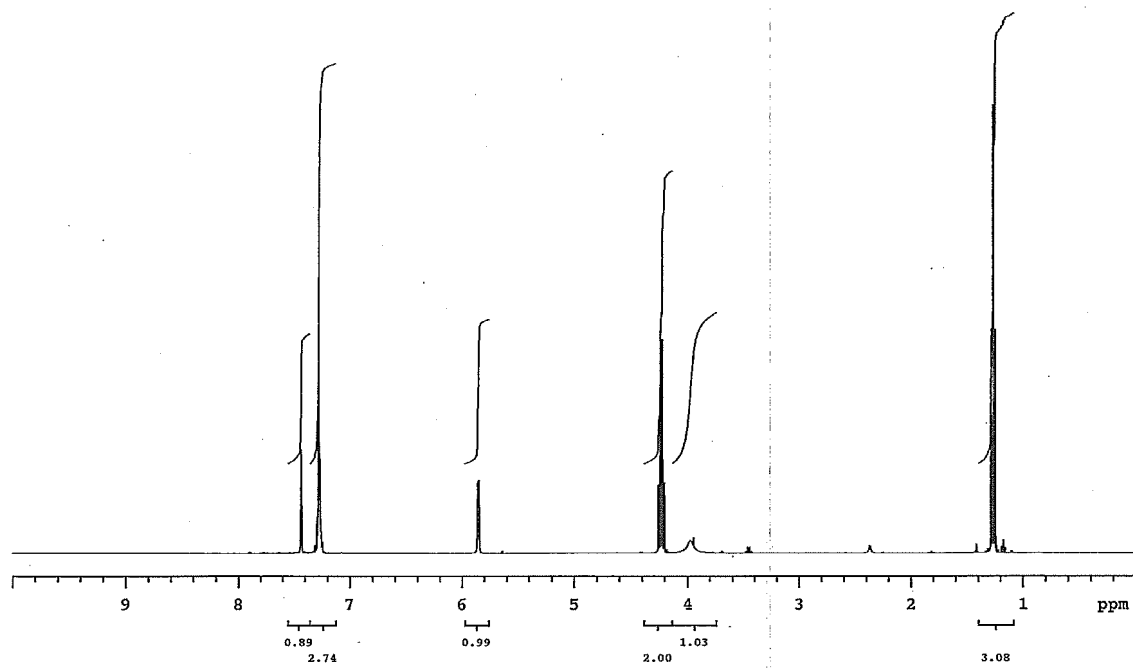

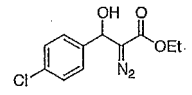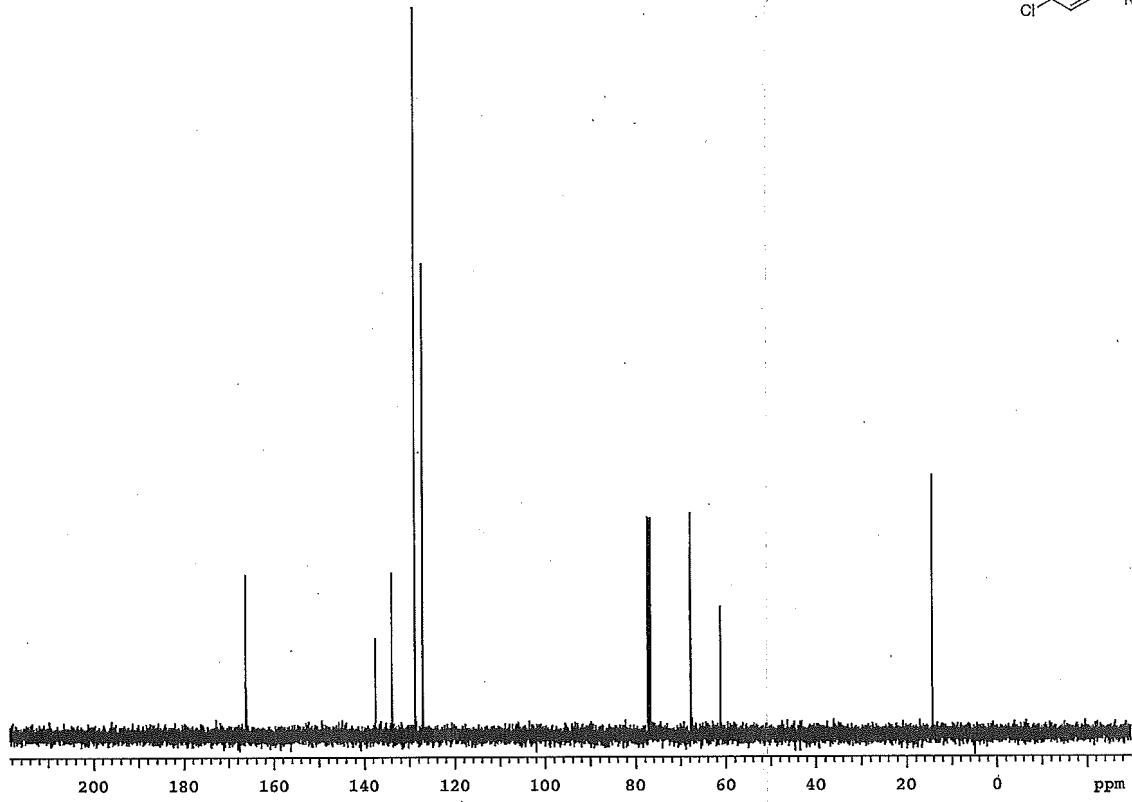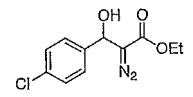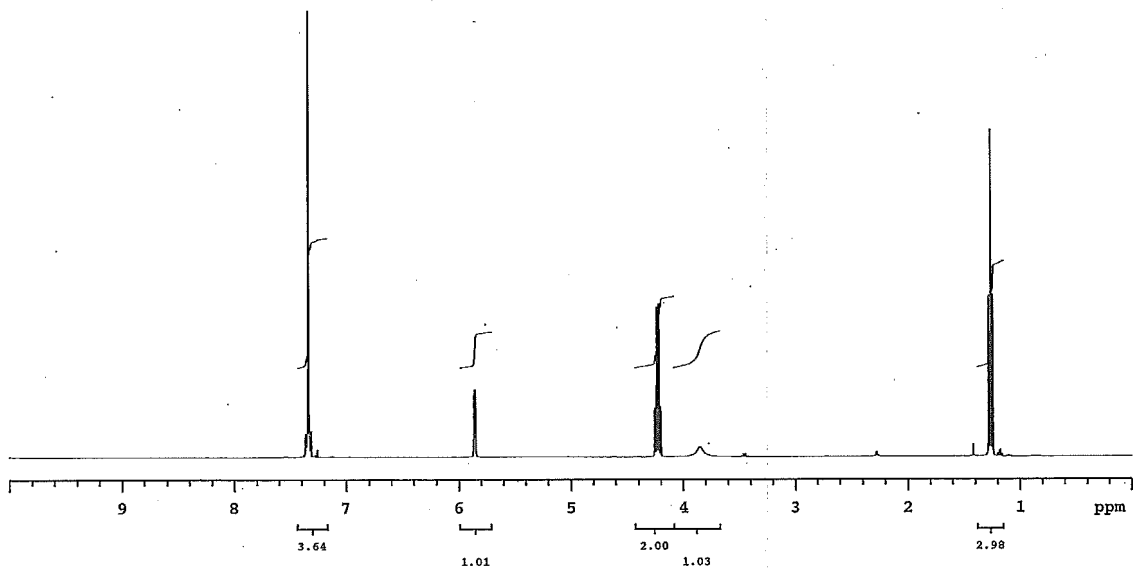



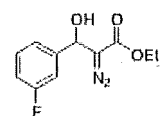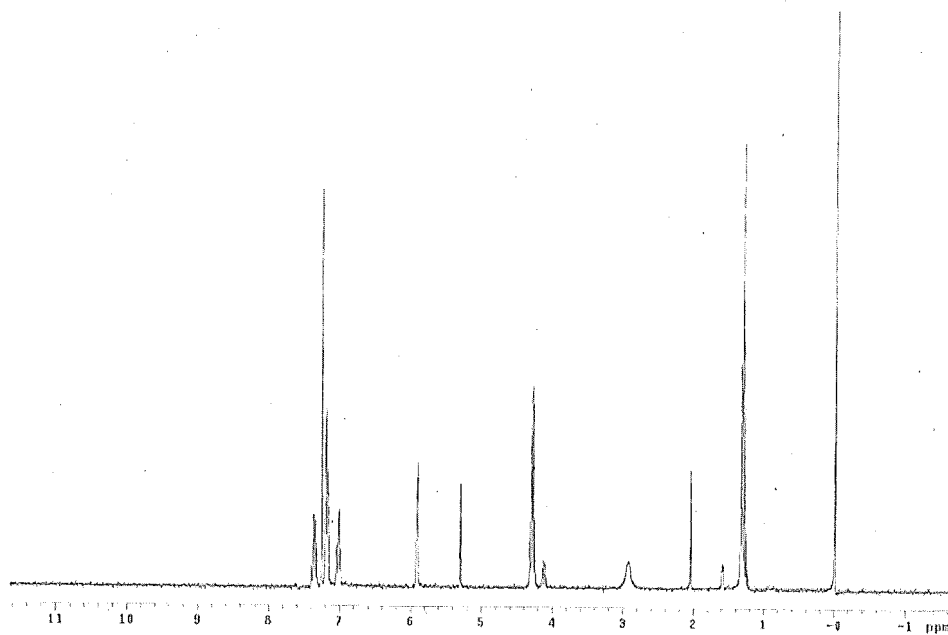

20-11-21

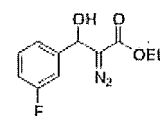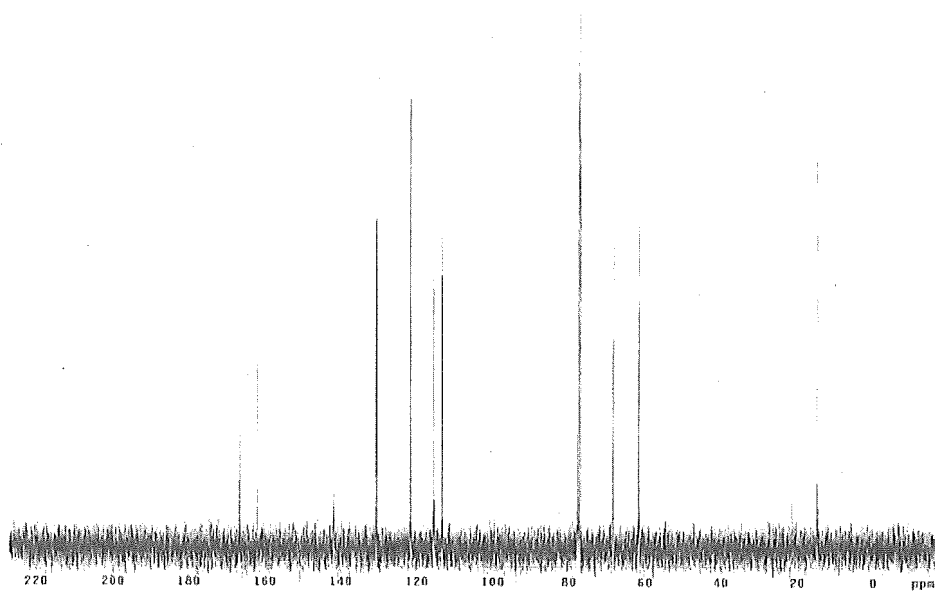

20-11-21

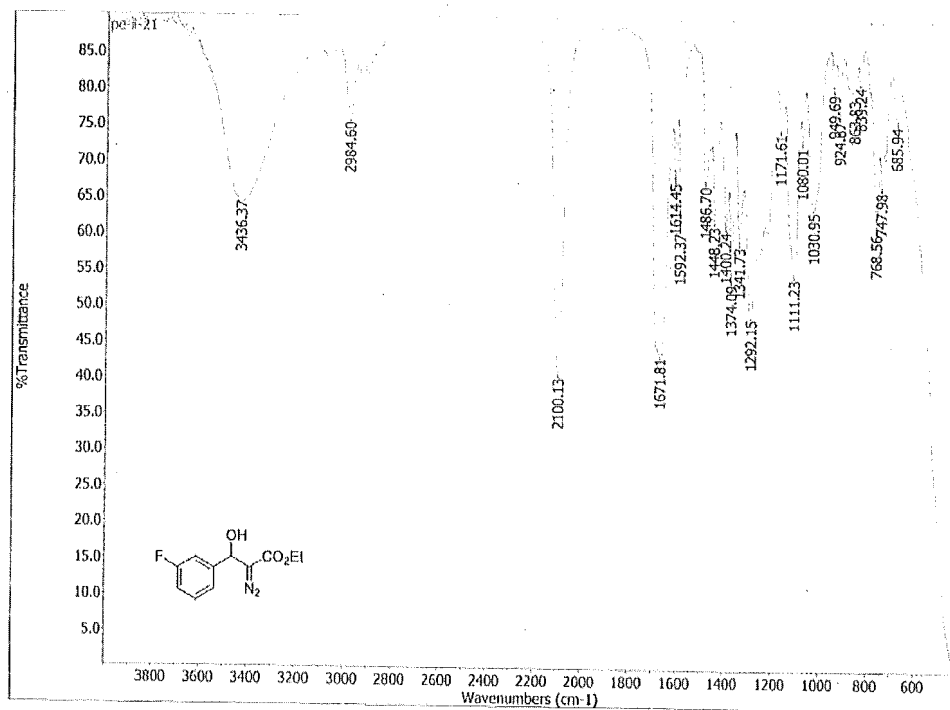

Stanford University Chemistry Department  
Trost Lab HPLC Report

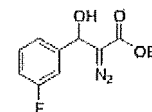

File: c:\star\data\bascali\nc-ii-48-97.3.220.0.8  
 Injection Date: 10/29/2009 04:07:08  
 Injection Method: c:\star\data\bascali\right method  
 Run Time (min): 26.777  
 Instrument (Inj): Chiral I.C. Right  
 Sample Prep Info: Manual injection

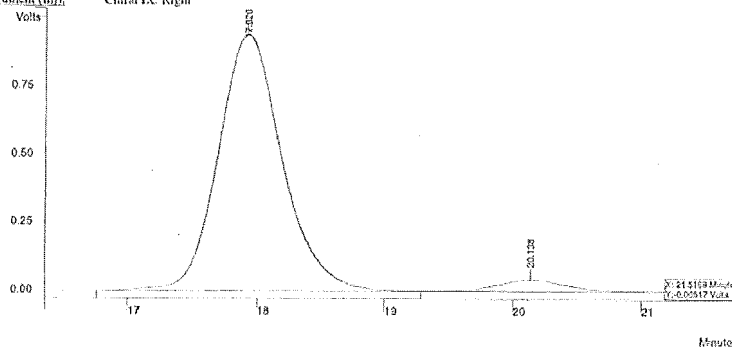

| Peak No | Ret. Time (min) | Peak Area | Width 1/2 (sec) | Percent Area |
|---------|-----------------|-----------|-----------------|--------------|
| 1       | 17.920          | 32710920  | 31.8            | 95.46        |
| 2       | 20.138          | 1554464   | 0.0             | 4.54         |
|         |                 | 34265384  |                 | 100.00       |

AD, 97:3 Hept:PrOH, 220nm, 0.8 mL/min

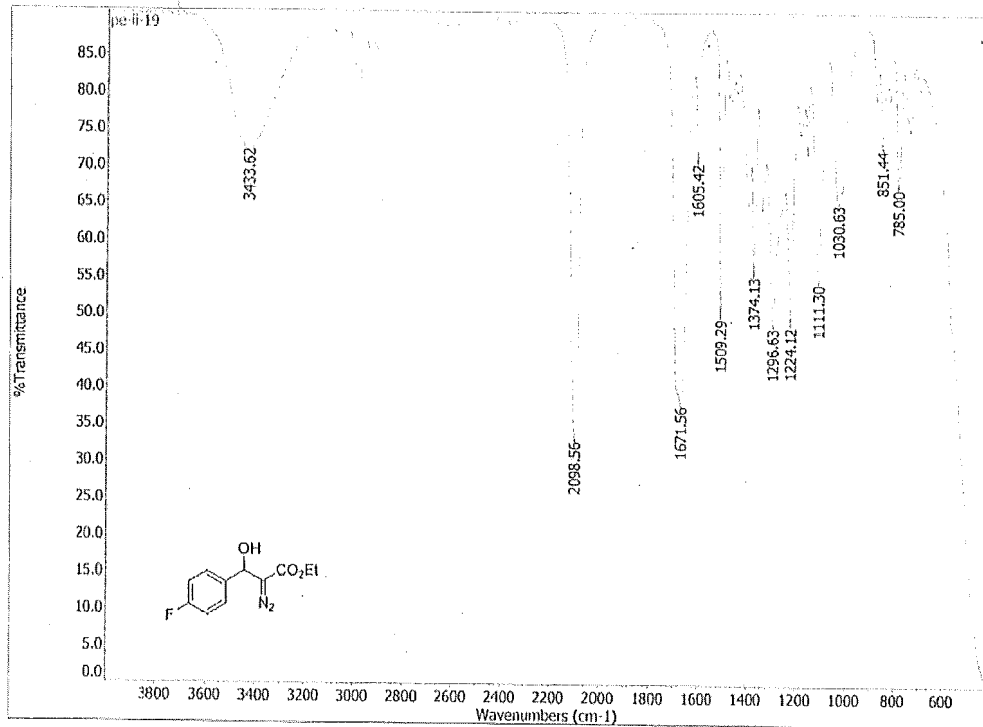

Stanford University Chemistry Department  
Trost Lab HPLC Report

File: c:\star\data\pasca\pe-ii-47-97.3.ad.220, Sample Prep Info: Manual injection  
Injection Date: 10/28/2009 04:52:47  
Injection Method: c:\star\data\lavid\chiral\_right method  
Run Time (min): 27.933  
Instrument (Inj): Chiral LC Right

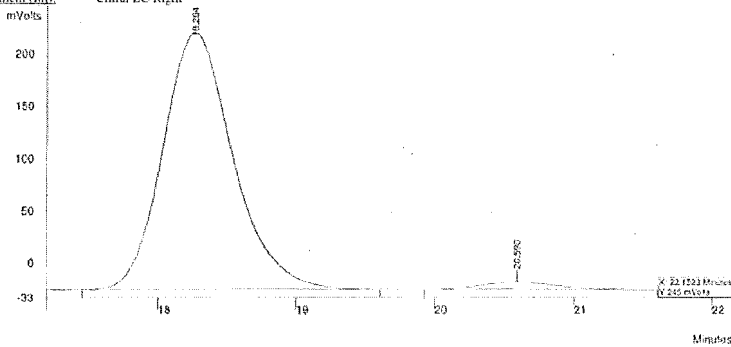

| Peak No | Ret. Time (min) | Peak Area | Width 1/2 (sec) | Percent Area |
|---------|-----------------|-----------|-----------------|--------------|
| 1       | 18.264          | 8613574   | 32.6            | 96.94        |
| 2       | 20.590          | 272189    | 34.0            | 3.06         |
|         |                 | 8885763   |                 | 100.00       |

AD, 97:3 Hept (iPr):OH, 220nm, 0.8 mL/min

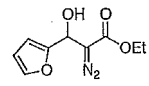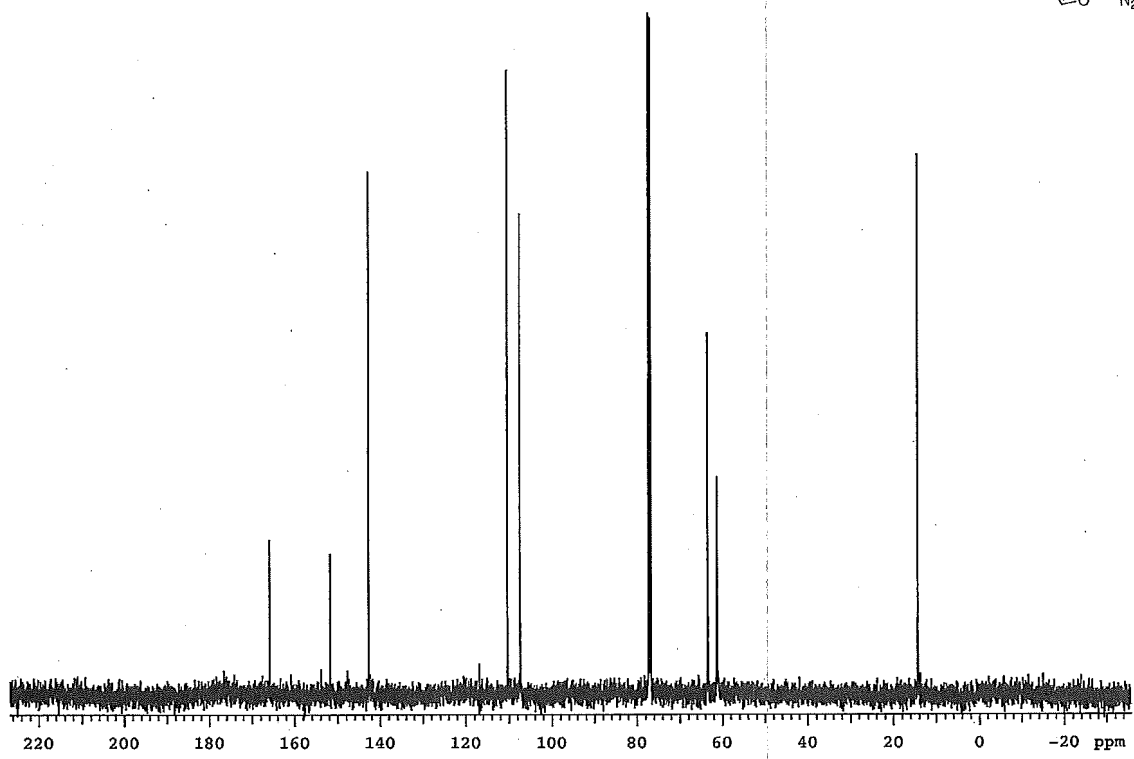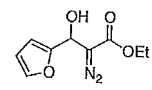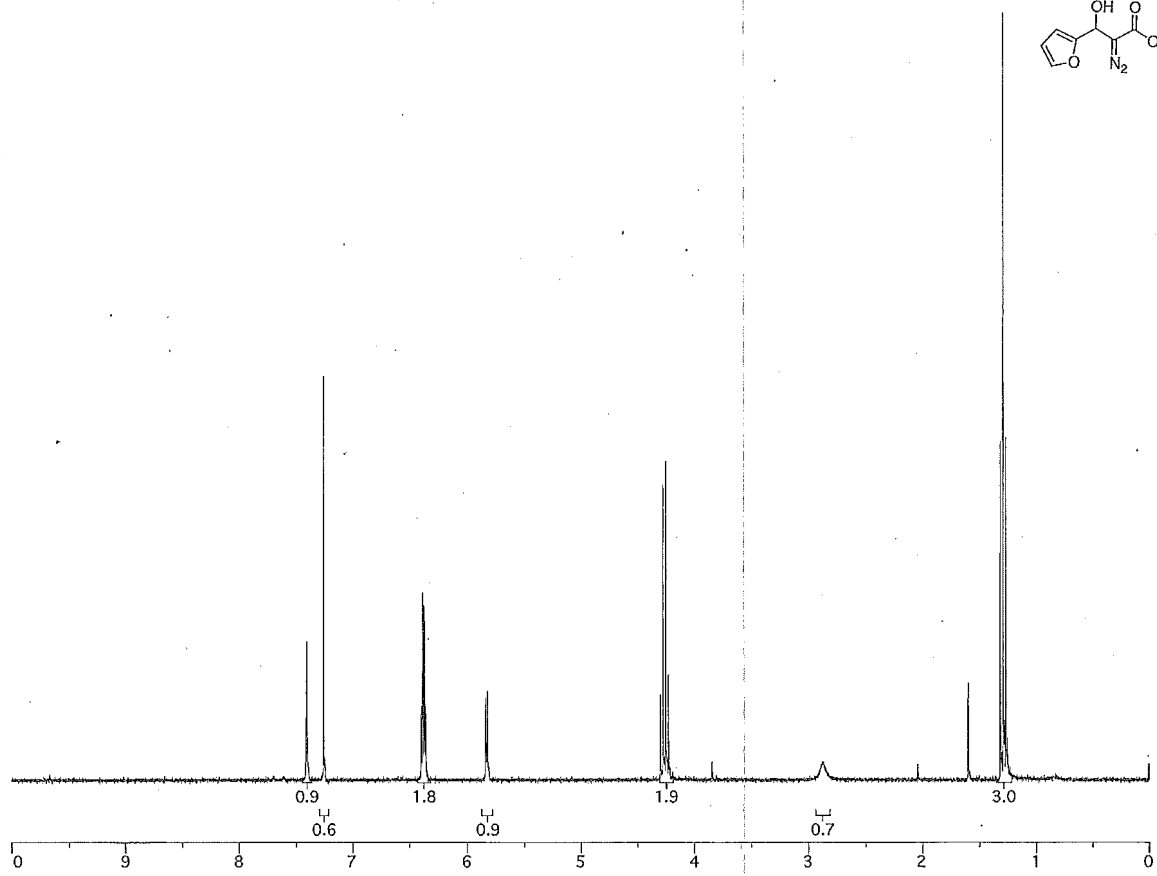

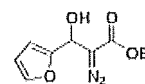

Stanford University Chemistry Department  
Troost Lab HPLC Report

ata File: c:\star\data\vascal\pe-ii-15-01-90-10-0.1      Sample Prep Info  
 Injection Date: 11/27/2009 02:27:08      Manual Injection  
 Injection Method: c:\star\data\method\chiral right method  
 Run Time (min): 16.346  
 Instrument (Inj): Chiral LC Right

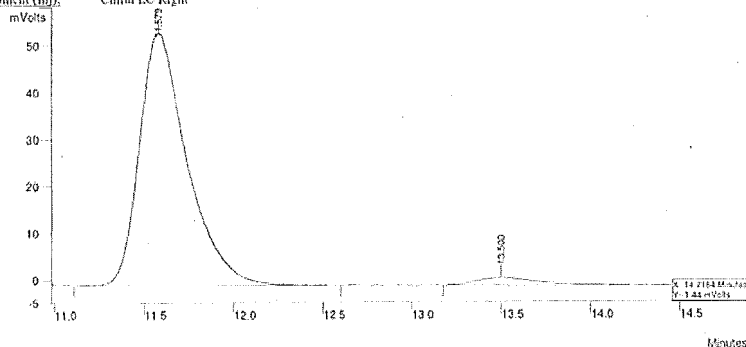

| Peak No | Ret. Time (min) | Peak Area | Width 1/2 (sec) | Percent Area |
|---------|-----------------|-----------|-----------------|--------------|
| 1       | 11.579          | 920306    | 16.3            | 96.50        |
| 2       | 13.500          | 35911     | 19.2            | 3.50         |
|         |                 | 1026217   |                 | 100.00       |

01, 99:10 Hept:PrOH, 0.8 ml/min, 220nm

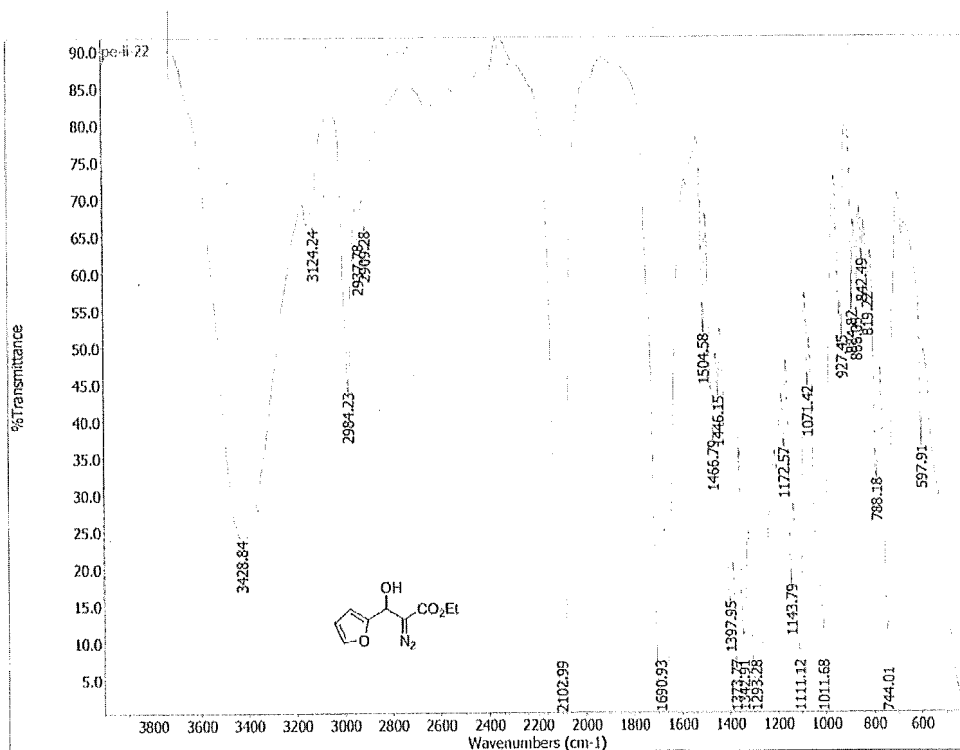

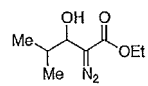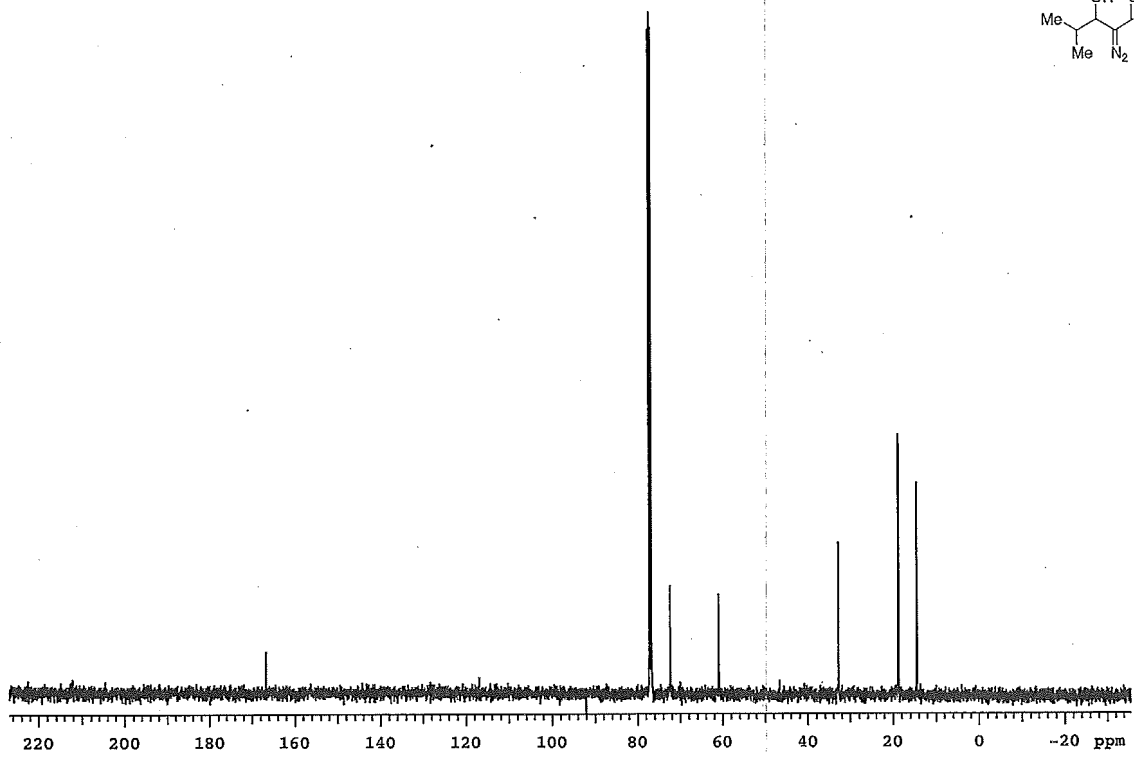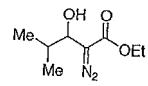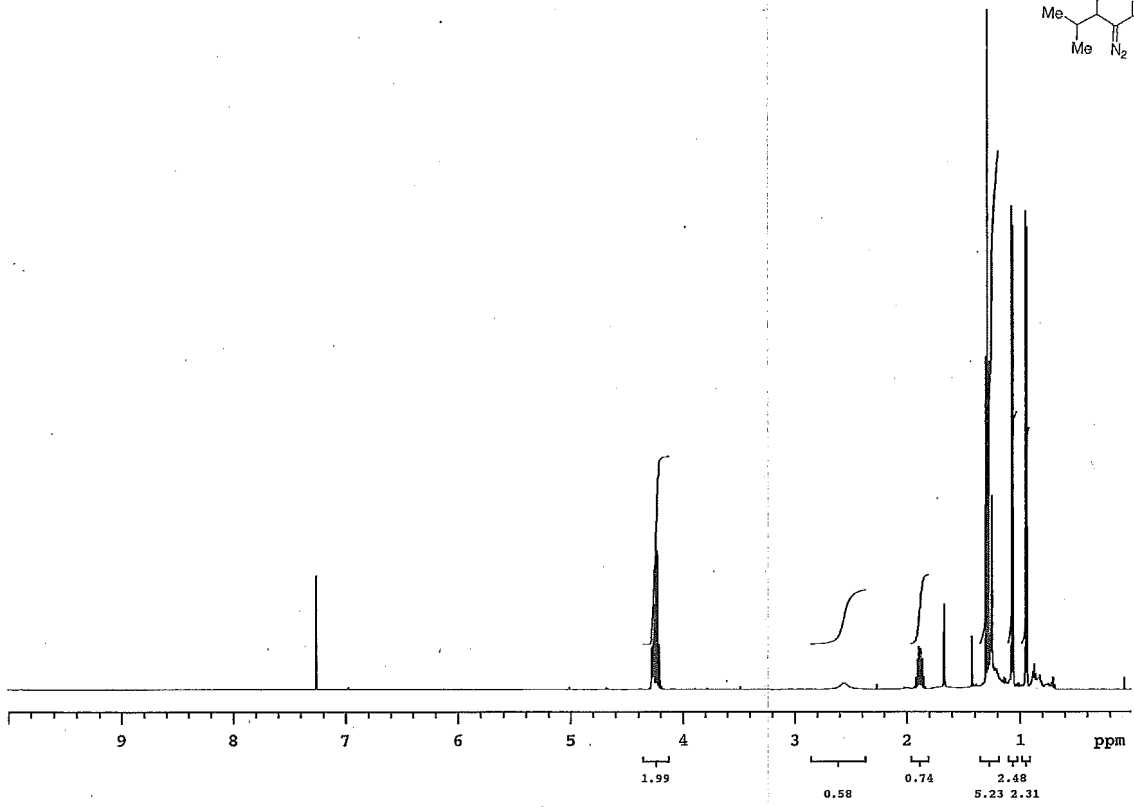

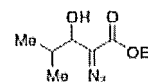

Stanford University Chemistry Department  
Trost Lab HPLC Report

Data File: c:\star\data\basc\be-iv-30-220nm-1.0-      Sample Prep Info  
 Injection Date: 02/21/2010 04:12:06      Manual injection  
 Injection Method: c:\star\data\David\chiral right method  
 Run Time (min): 17.974  
 Instrument (inj): Chiral LC Right

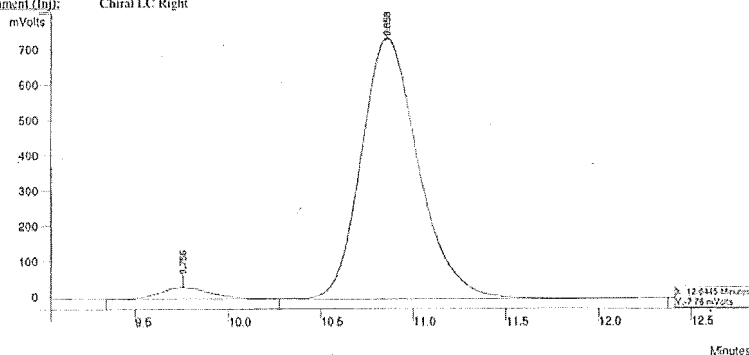

| Peak No | Ret. Time (min) | Peak Area | Width 1/2 (sec) | Percent Area |
|---------|-----------------|-----------|-----------------|--------------|
| 1       | 9.756           | 640353    | 17.1            | 3.88         |
| 2       | 10.858          | 15869144  | 19.4            | 96.12        |
|         |                 | 16509497  |                 | 100.00       |

AD, 97:3 Hept:IPrOH, 1.0mL/min, 220nm

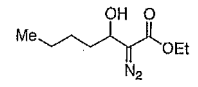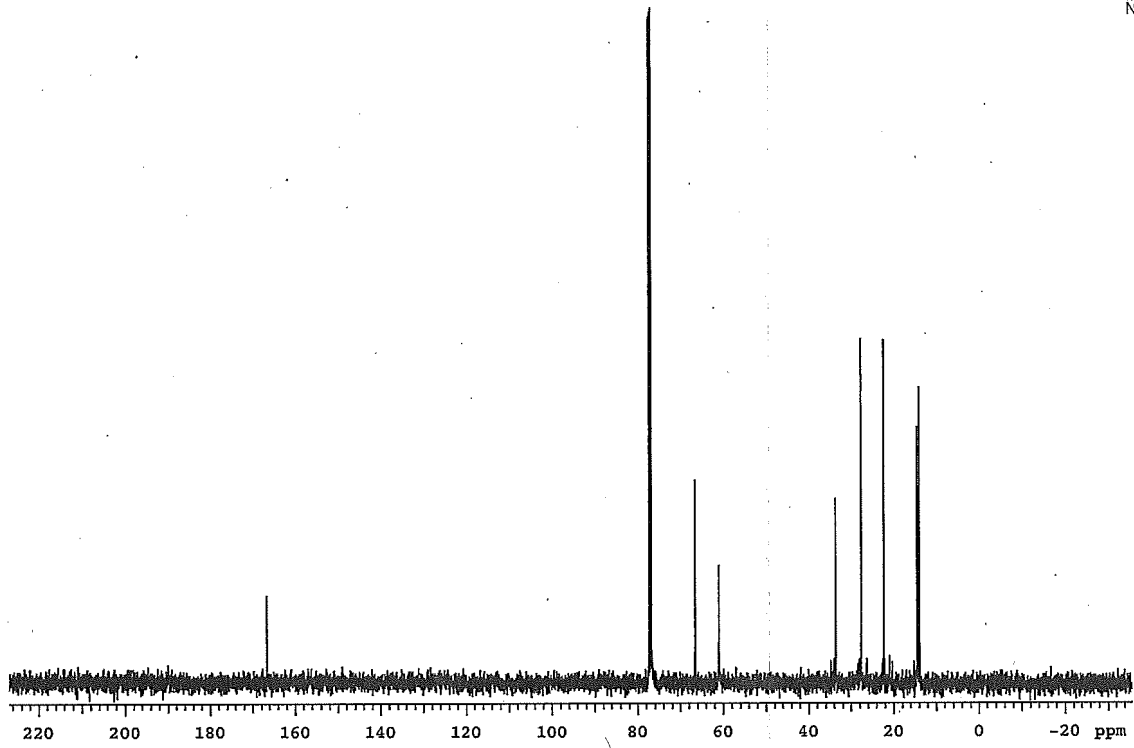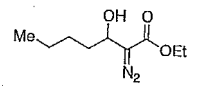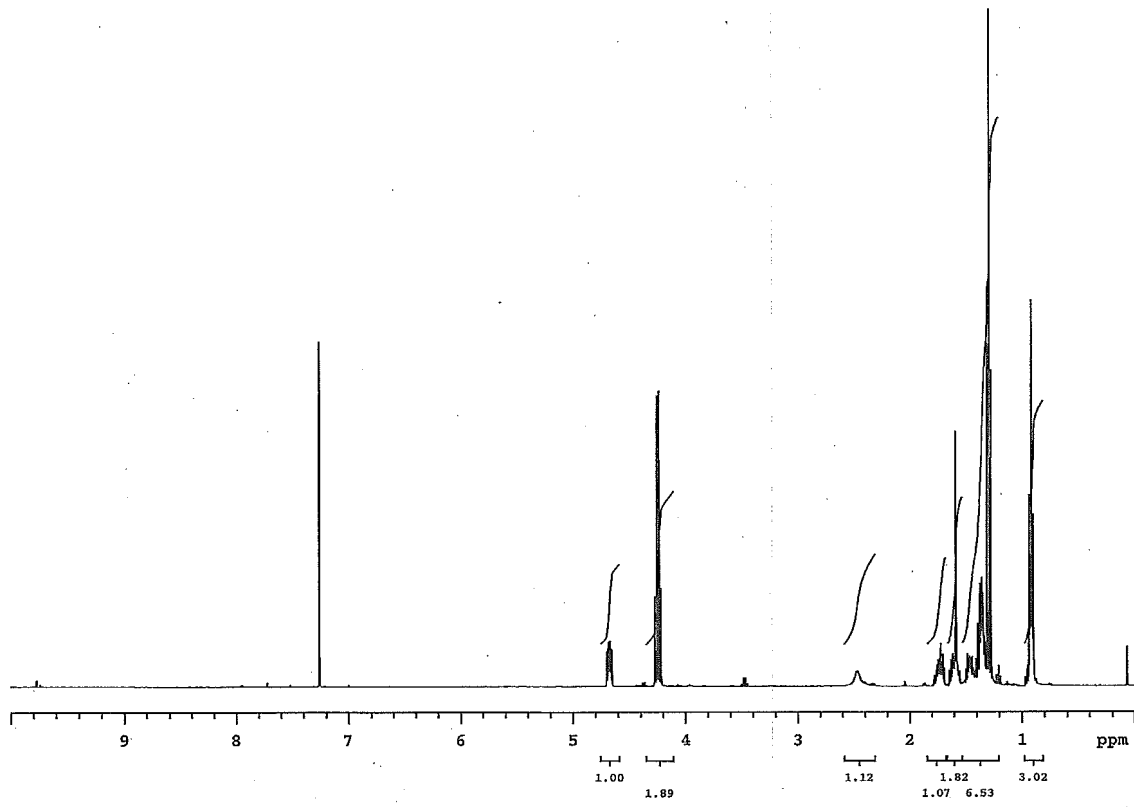



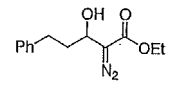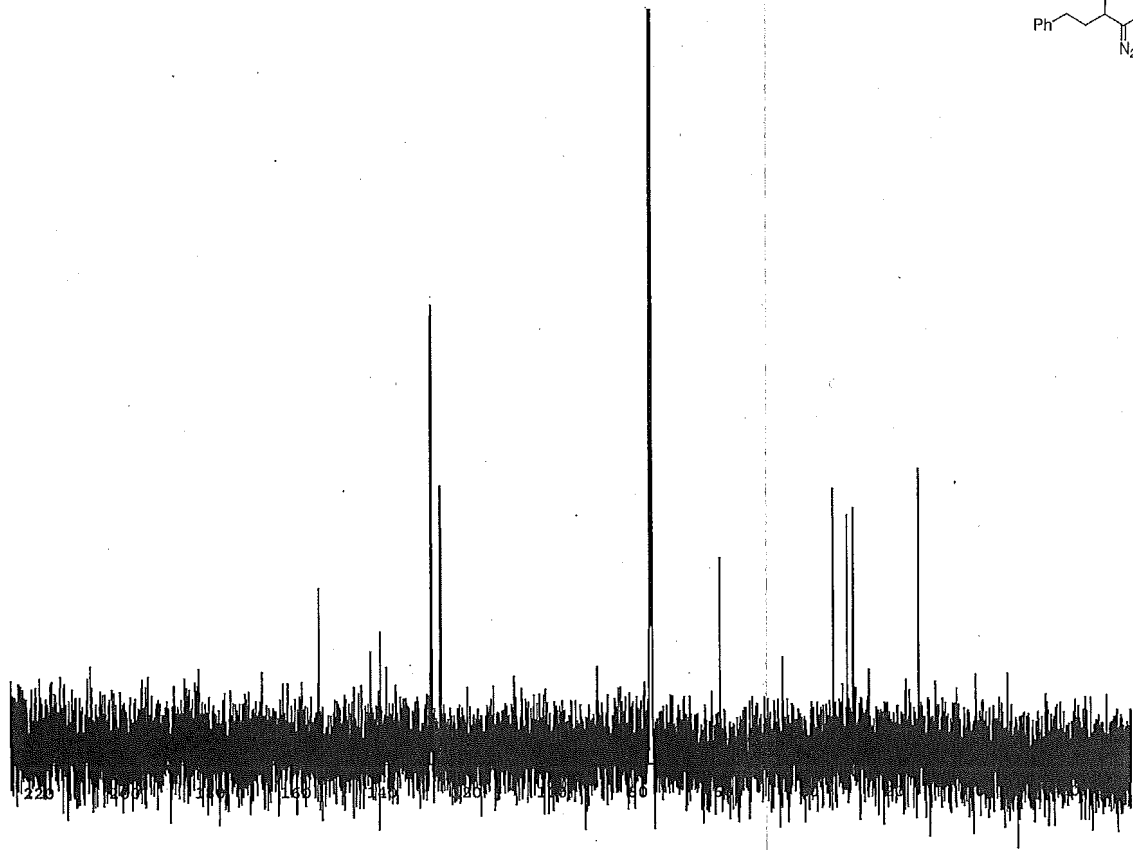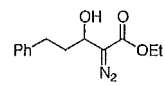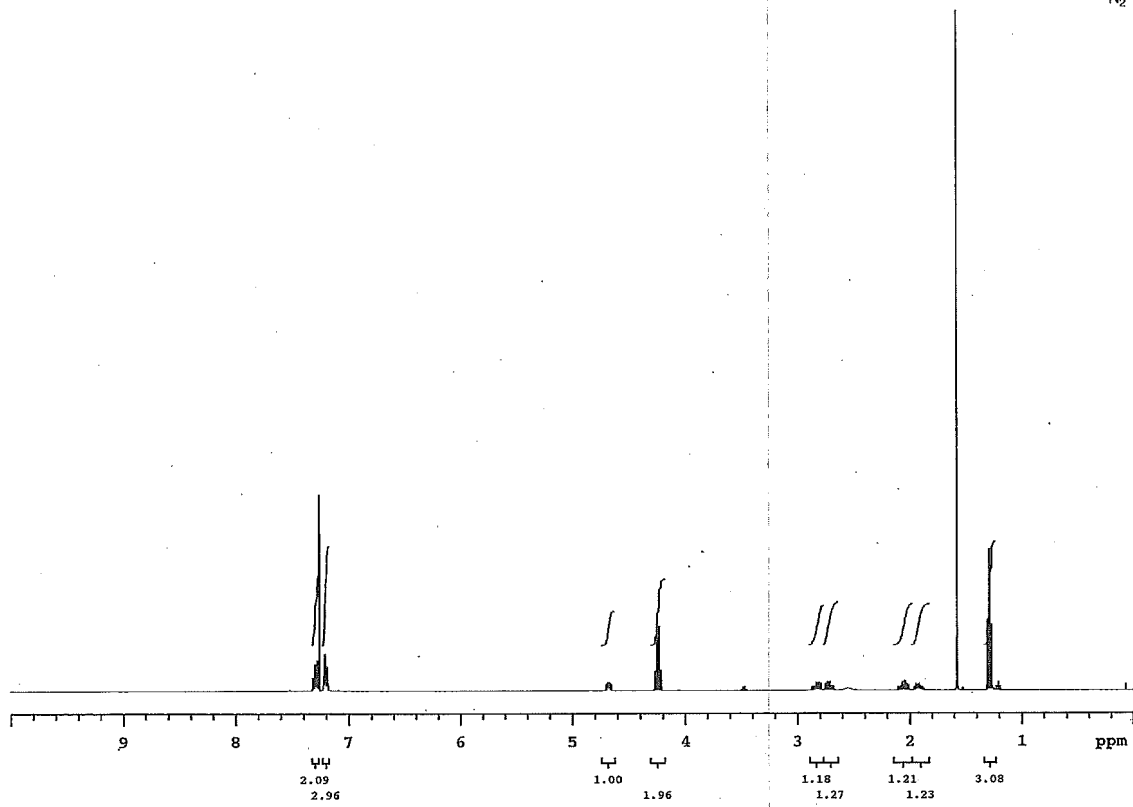

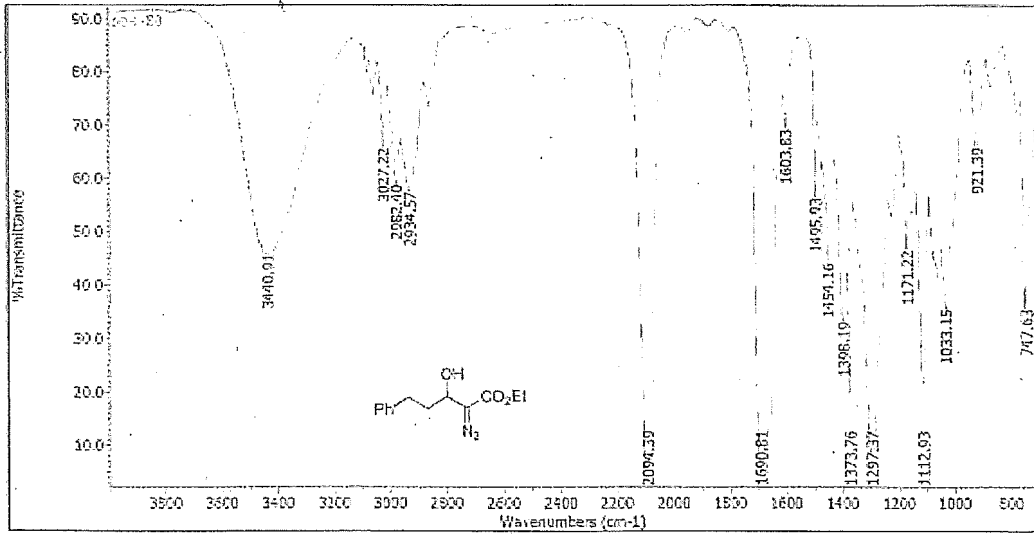

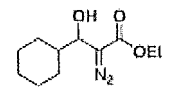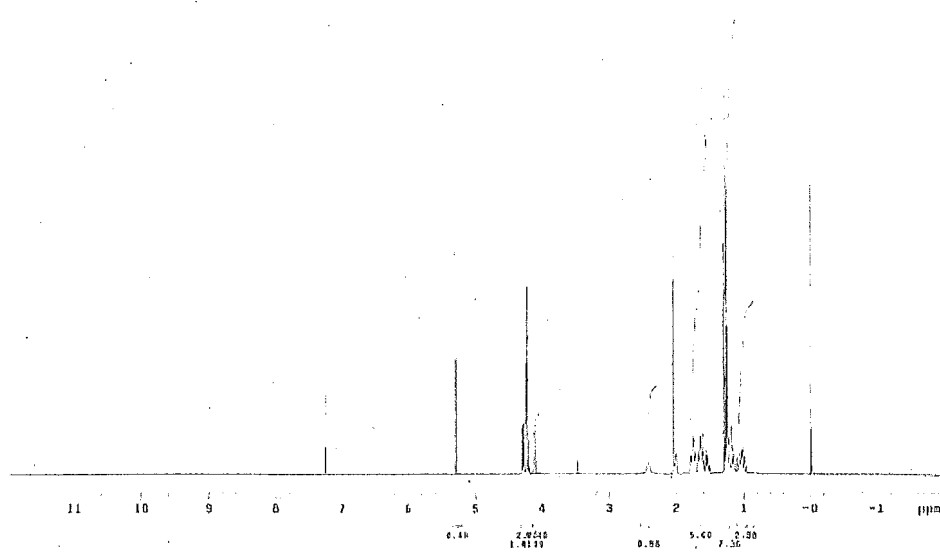

0.00

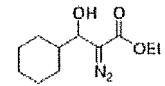

| INDEX | FREQUENCY | PHA     | HEIGHT |
|-------|-----------|---------|--------|
| 1     | 26145.332 | 186.764 | 16.1   |
| 2     | 9763.195  | 77.256  | 459.7  |
| 3     | 5675.555  | 77.920  | 182.0  |
| 4     | 9643.735  | 76.744  | 152.1  |
| 5     | 8372.888  | 71.486  | 35.3   |
| 6     | 1659.924  | 89.882  | 26.9   |
| 7     | 5287.476  | 82.474  | 53.9   |
| 8     | 5289.446  | 83.882  | 13.1   |
| 9     | 3569.074  | 28.128  | 123.1  |
| 10    | 3242.959  | 26.181  | 199.0  |
| 11    | 3144.108  | 25.816  | 95.8   |
| 12    | 3217.921  | 25.680  | 89.2   |
| 13    | 1512.365  | 11.422  | 78.7   |

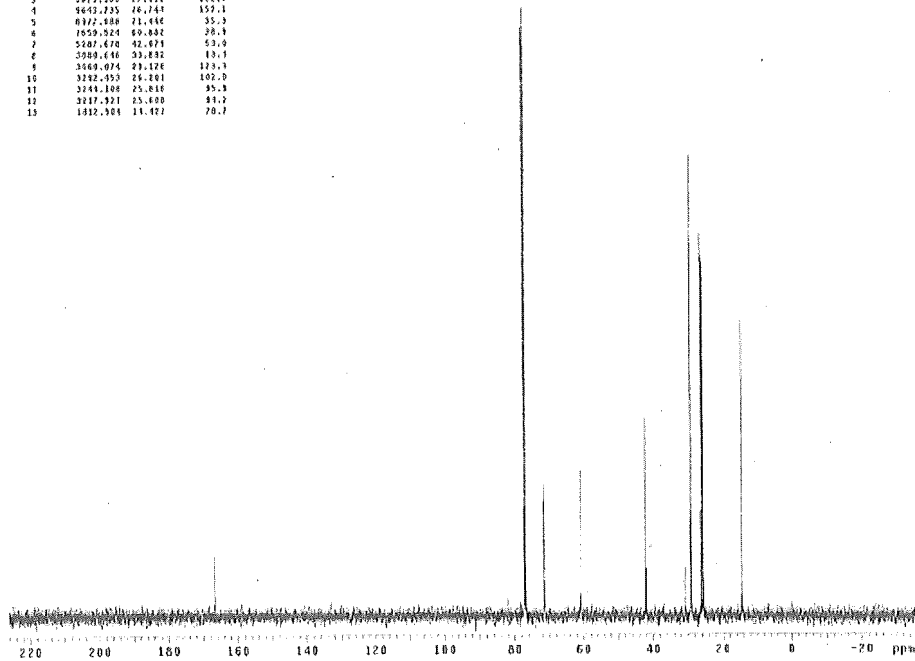

13C NMR - 100 MHz - CDCl<sub>3</sub>

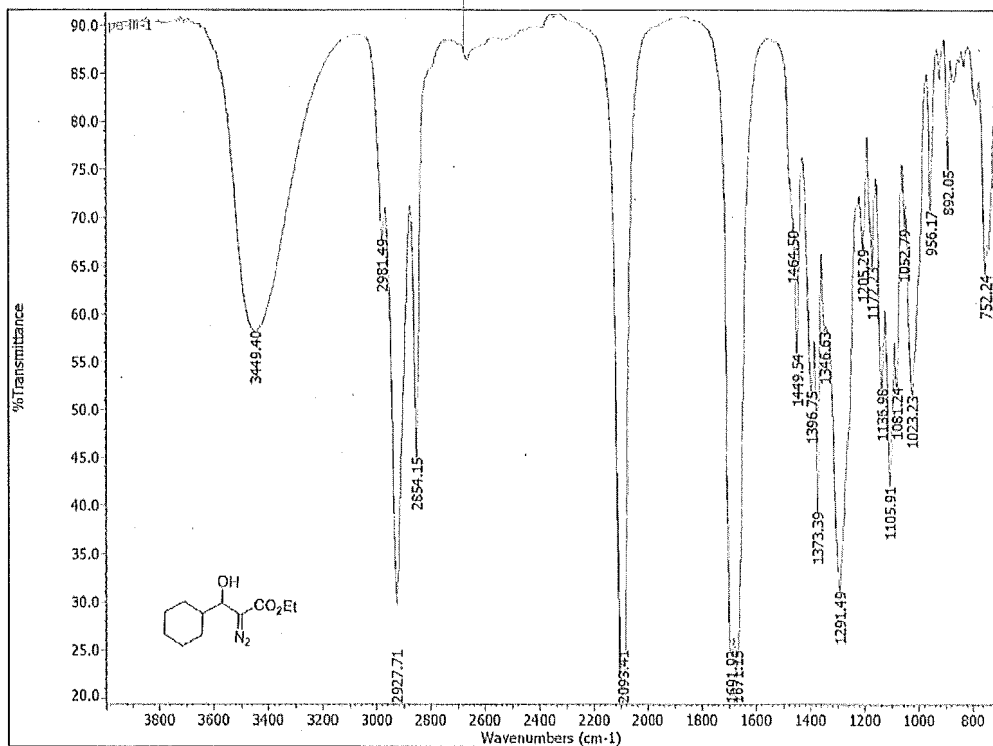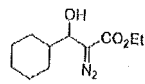

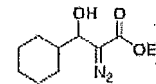

Stanford University Chemistry Department  
Trost Lab HPLC Report

File: c:\star\data\wascall\06-11-83-06-97.3-220  
 Injection Date: 01/25/2010 10:42:22 Sample Prep Info  
Manual Injection  
 Injection Method: c:\star\data\wascall\right method  
 Inj. Time (min): 11.401  
 Instrument (Inj): Chiral LC Right

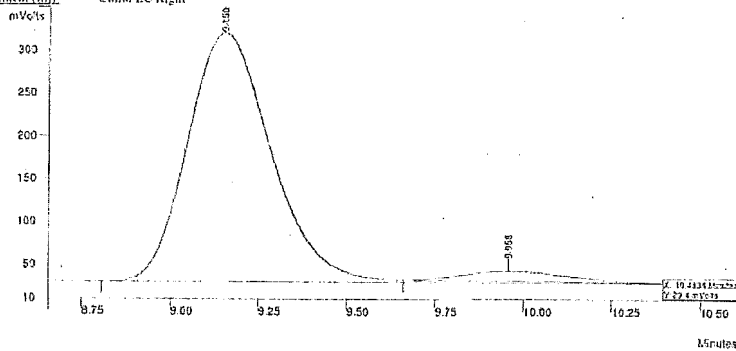

| Peak No | Ret. Time (min) | Peak Area | Width 1/2 (sec) | Percent Area |
|---------|-----------------|-----------|-----------------|--------------|
| 1       | 9.150           | 4858555   | 15.1            | 93.29        |
| 2       | 9.958           | 239984    | 0.0             | 4.71         |
|         |                 | 5098539   |                 | 100.00       |

OB, 97-3 Hept: iPrOH, 220nm, 0.8 ml/min

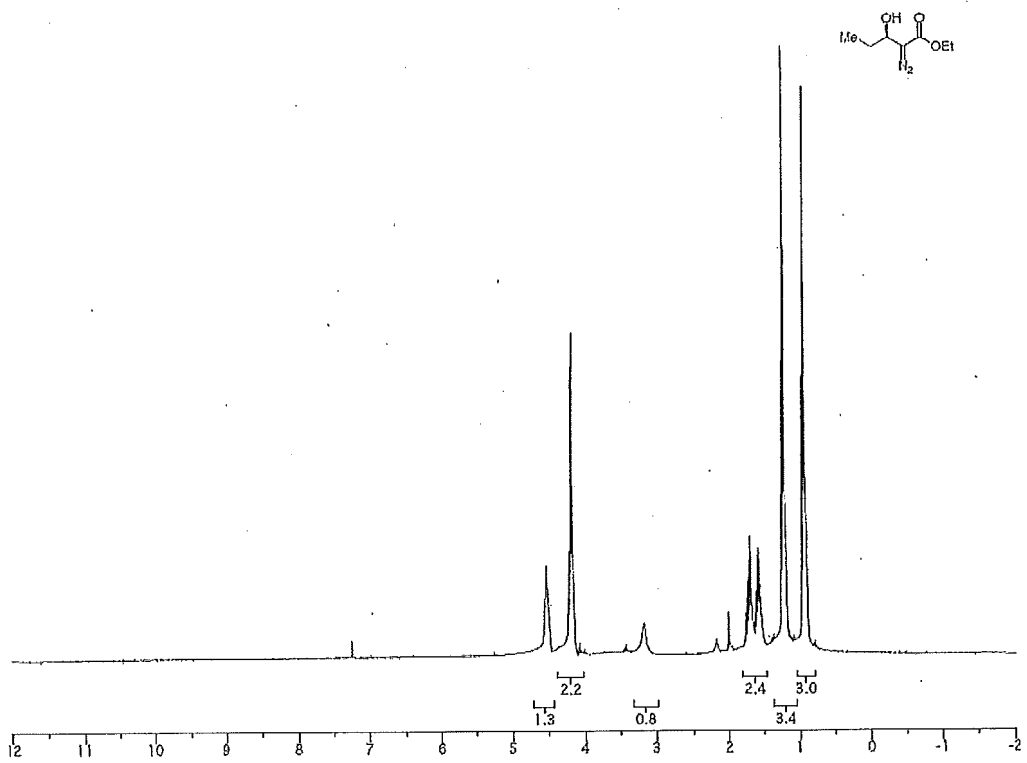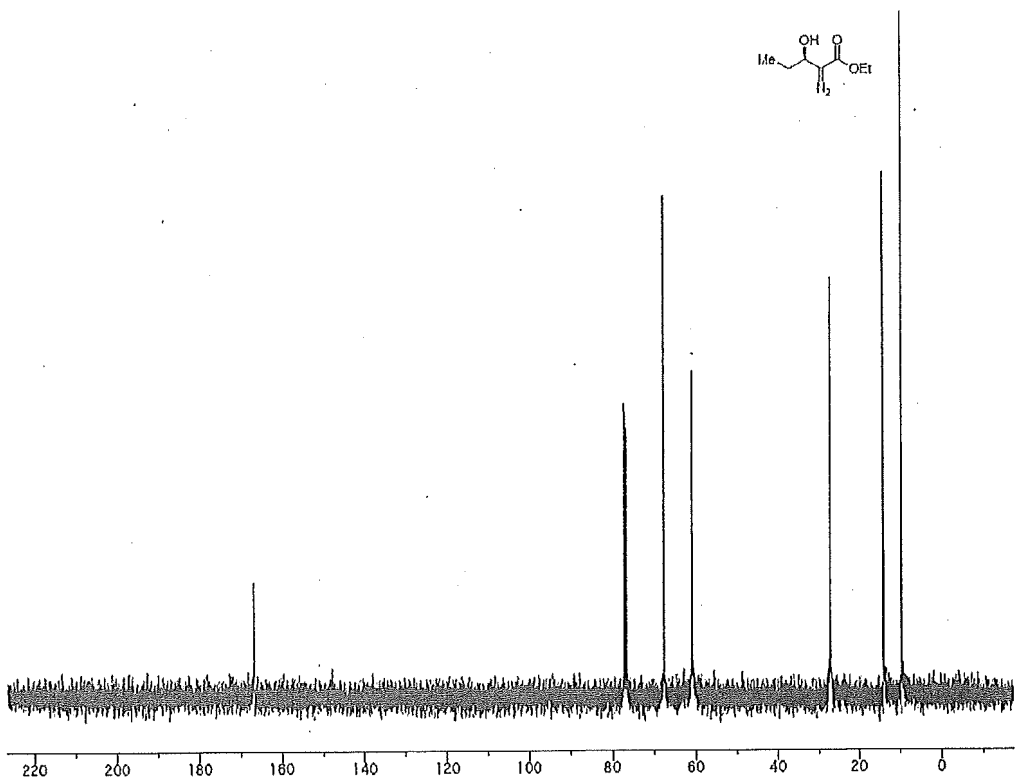

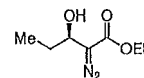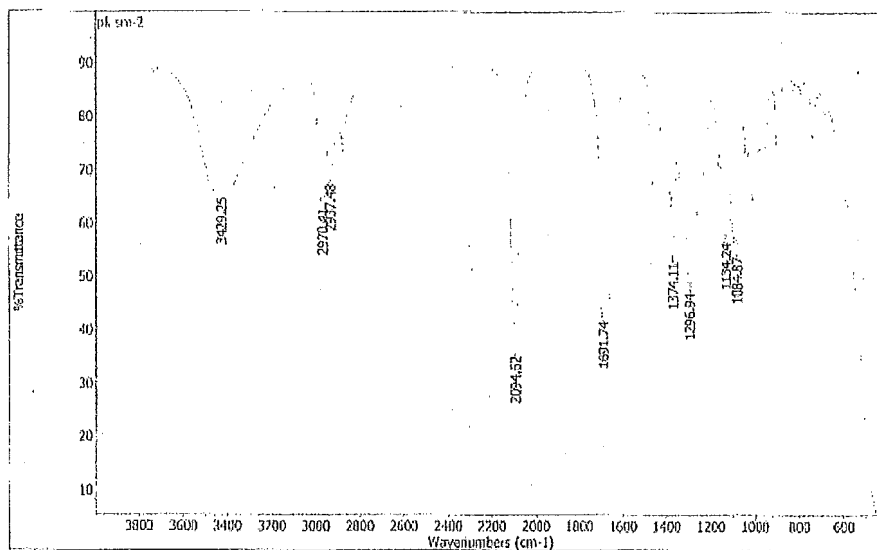

Stanford University Chemistry Department  
Trost Lab HPLC Report

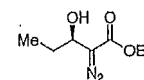

Data File: c:\star\data\sushant\sm-xx-84-ad-97-3-  
Injection Date: 09/01/2009 05:08:46 Sample Prep Info  
Injection Method: c:\star\data\javid\chiral right method Manual Injection  
Run Time (min): 19.397  
Instrument (obj): Chiral LC Right

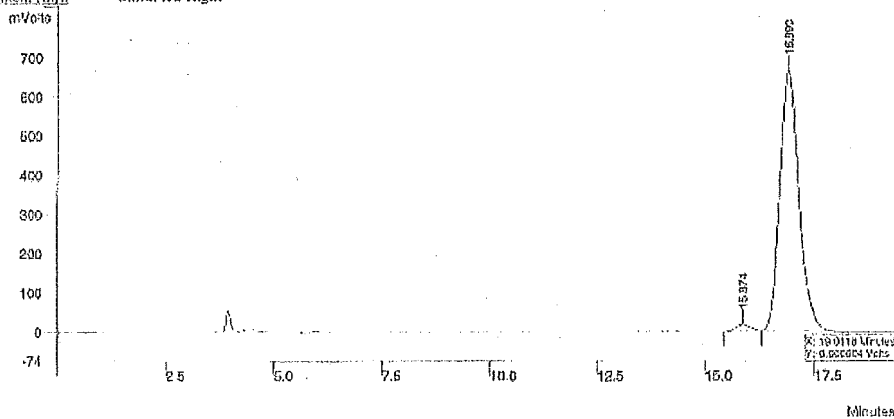

| Peak No | Ret. Time (min) | Peak Area | Width 1/2 (sec) | Percent Area |
|---------|-----------------|-----------|-----------------|--------------|
| 1       | 15.874          | 378309    | 24.5            | 1.87         |
| 2       | 16.890          | 19807282  | 27.1            | 98.13        |
|         |                 | 20185592  |                 | 100.00       |

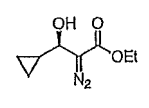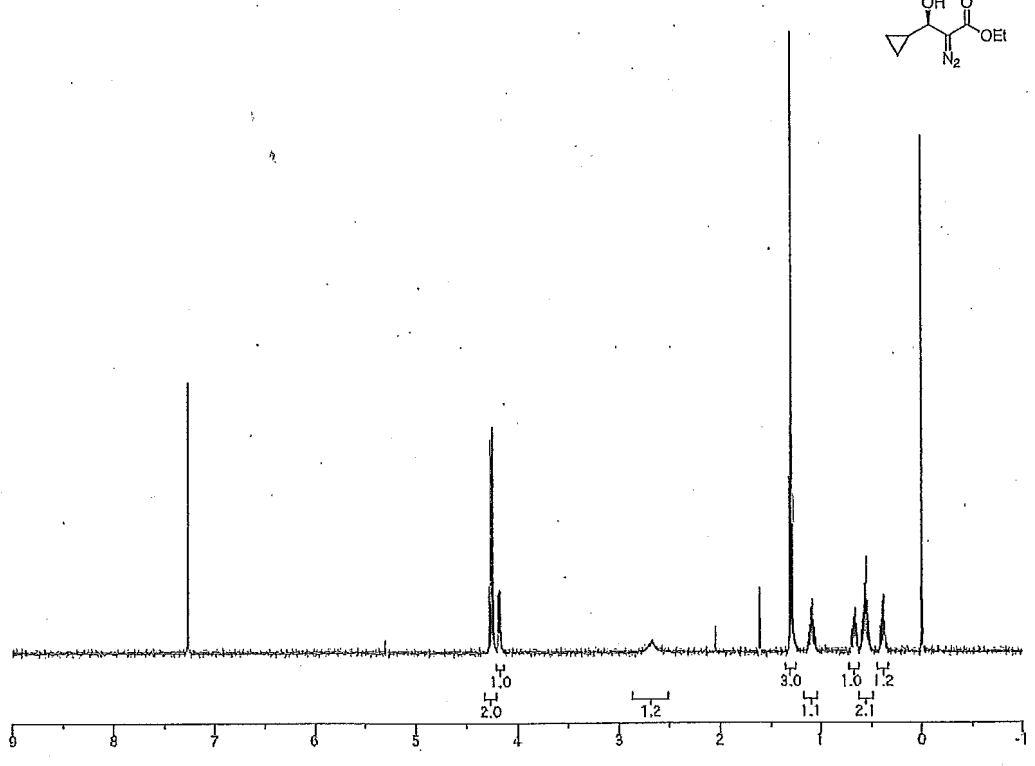



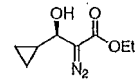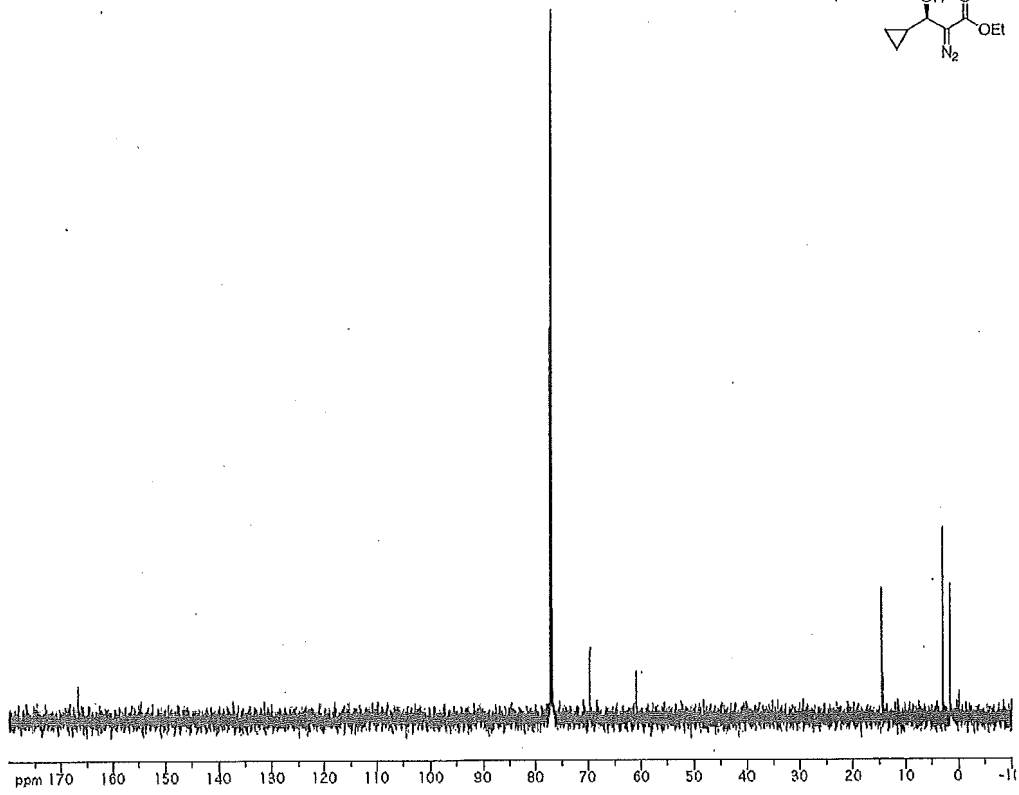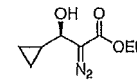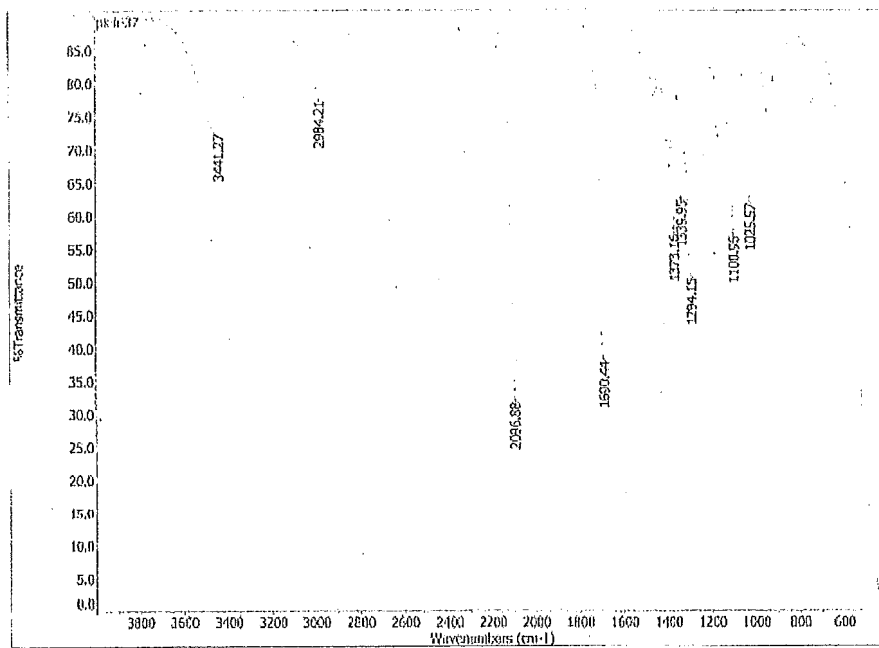

Stanford University Chemistry Department  
Trost Lab HPLC Report

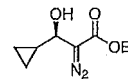

Data File: c:\star\data\philip\luk-11-36-as-99.5-0.5

Injection Date: 07/31/2009 12:05:39

Sample Prep Info

Injection Method: c:\star\data\javid\chiral right method

Manual Injection

Run Time (min): 66.443

Instrument (in): Chiral LC Right

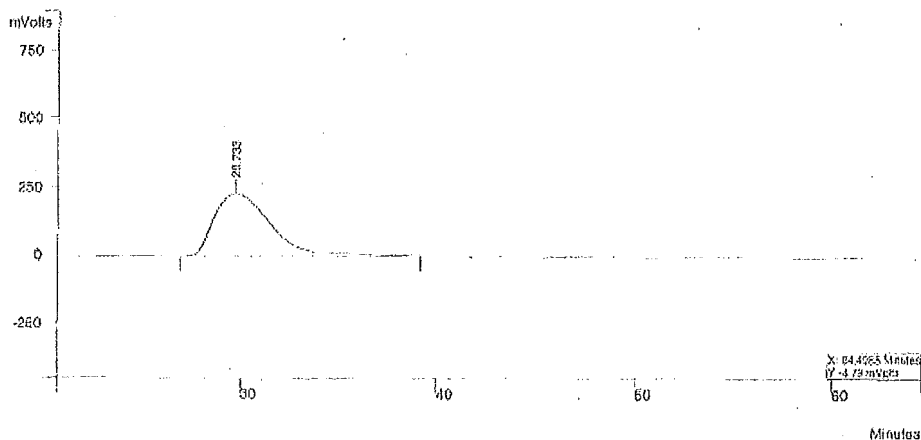

| Peak No | Ret. Time (min) | Peak Area | Width 1/2 (sec) | Percent Area | Method Notes    |
|---------|-----------------|-----------|-----------------|--------------|-----------------|
| 1       | 29.733          | 46116976  | 184.4           | 100.00       | No Method Notes |
|         |                 | 46116976  |                 | 100.00       |                 |

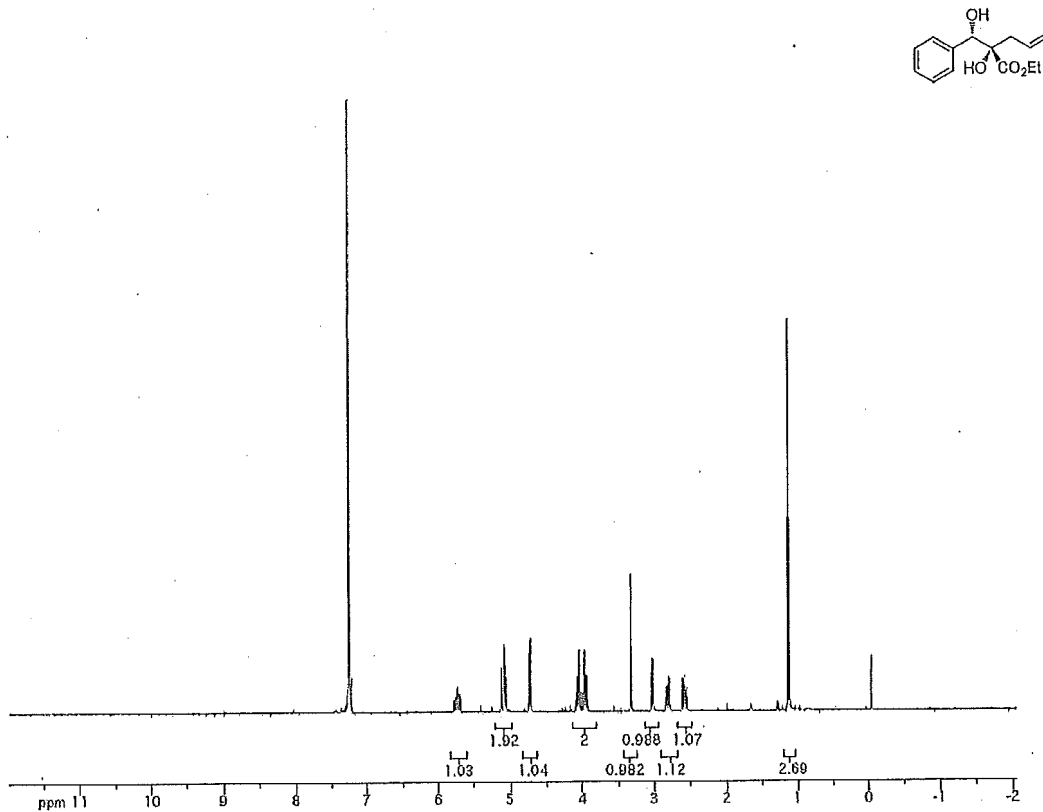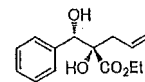

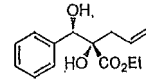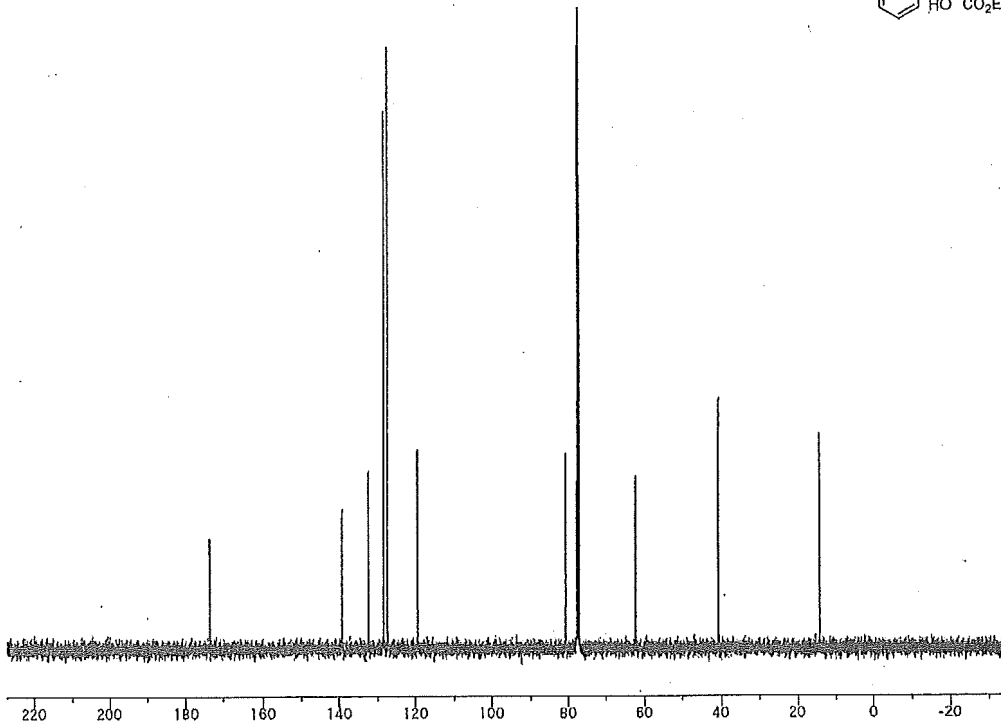

Stanford University Chemistry Department  
Trost Lab HPLC Report

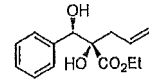

Data File: c:\star\data\philip\pk-1-62-ad-90-10-1  
 Inj. Date: 06/03/2009 02:52:04  
 Injection Method: c:\star\data\dauid\chiral right method  
 Run Time (min): 16.835  
 Instrument (id): Chiral LC Right

Sample Prep Info  
Manual Injection

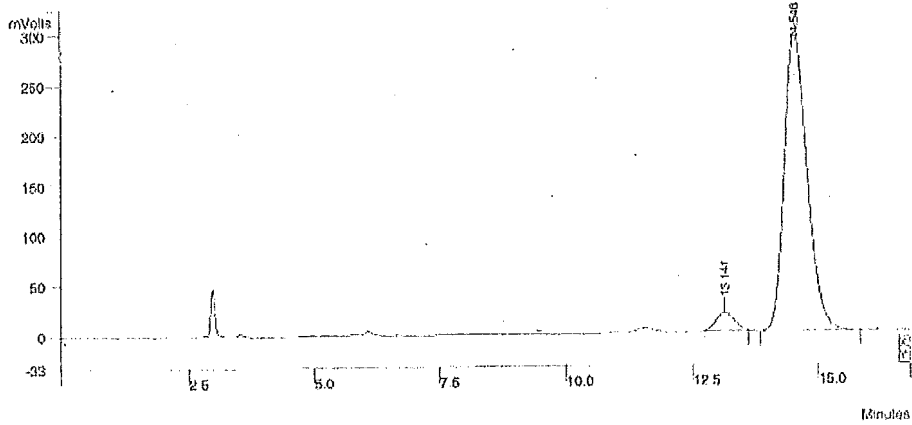

| Peak No | Ret. Time (min) | Peak Area | Width 1/2 (sec) | Percent Area |
|---------|-----------------|-----------|-----------------|--------------|
| 1       | 13.141          | 445468    | 24.1            | 4.53         |
| 2       | 14.546          | 9391604   | 29.2            | 95.47        |
|         |                 | 9837072   |                 | 100.00       |

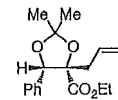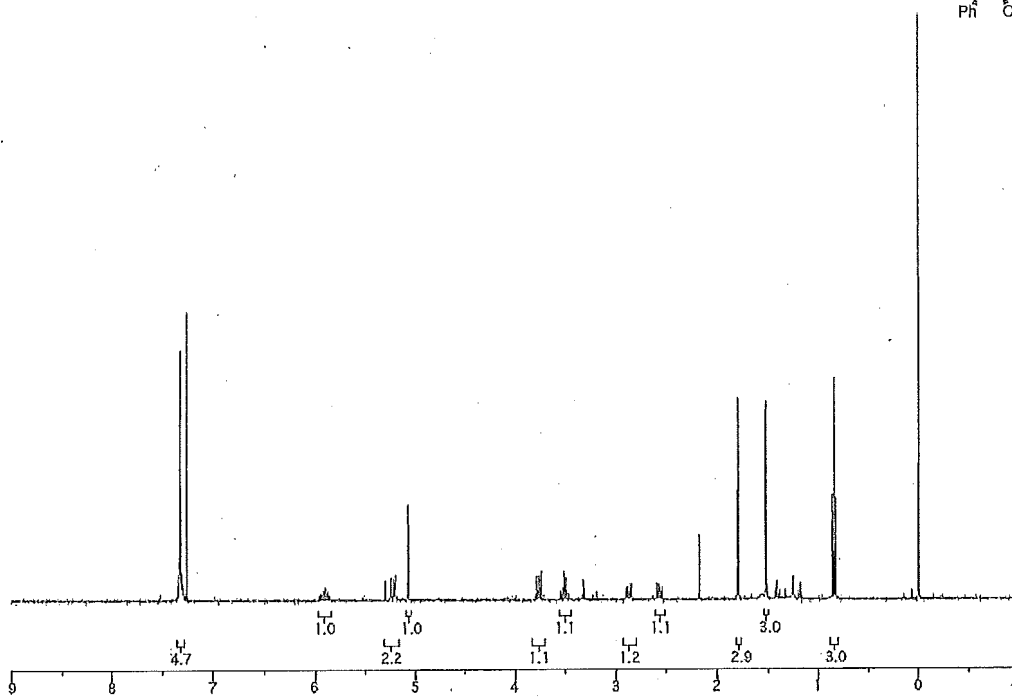

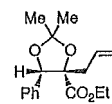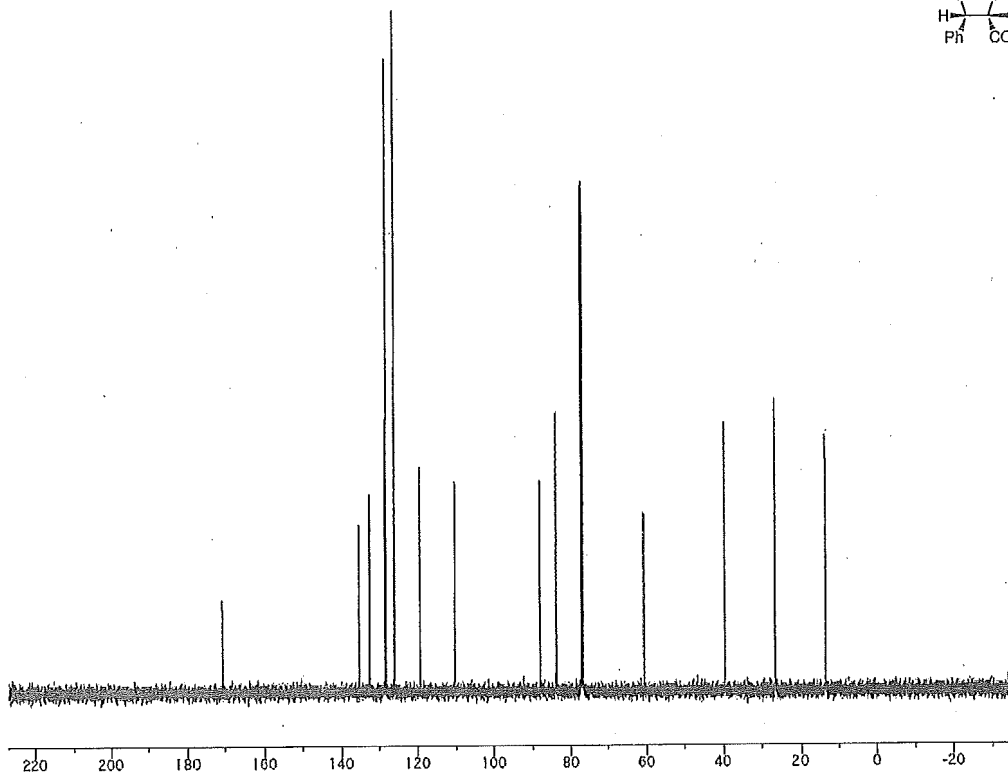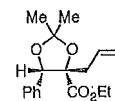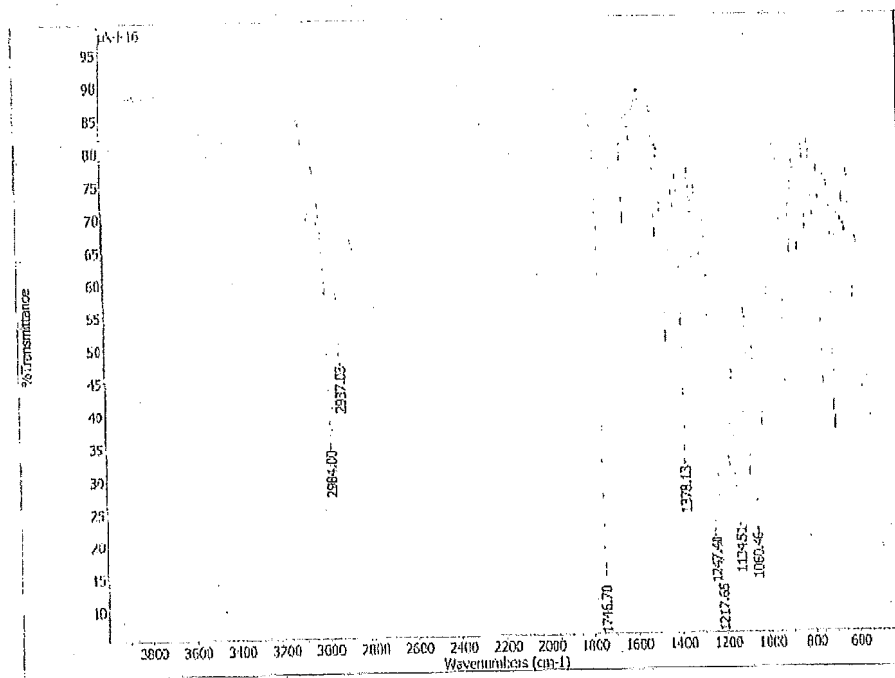

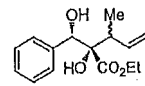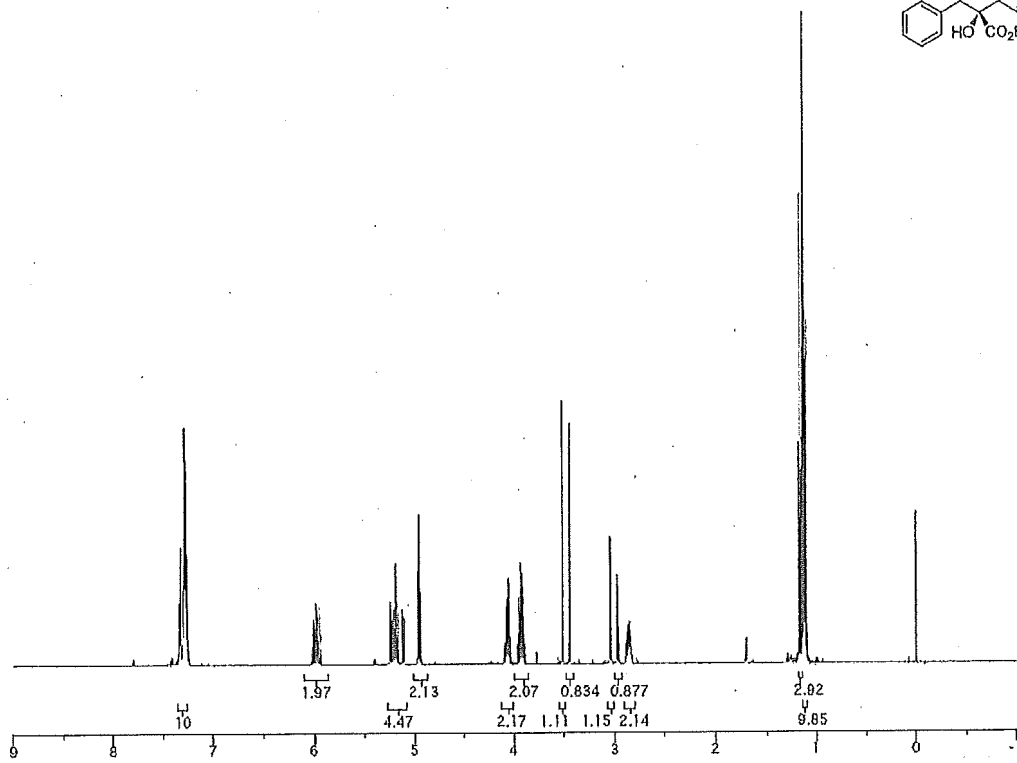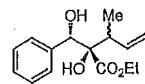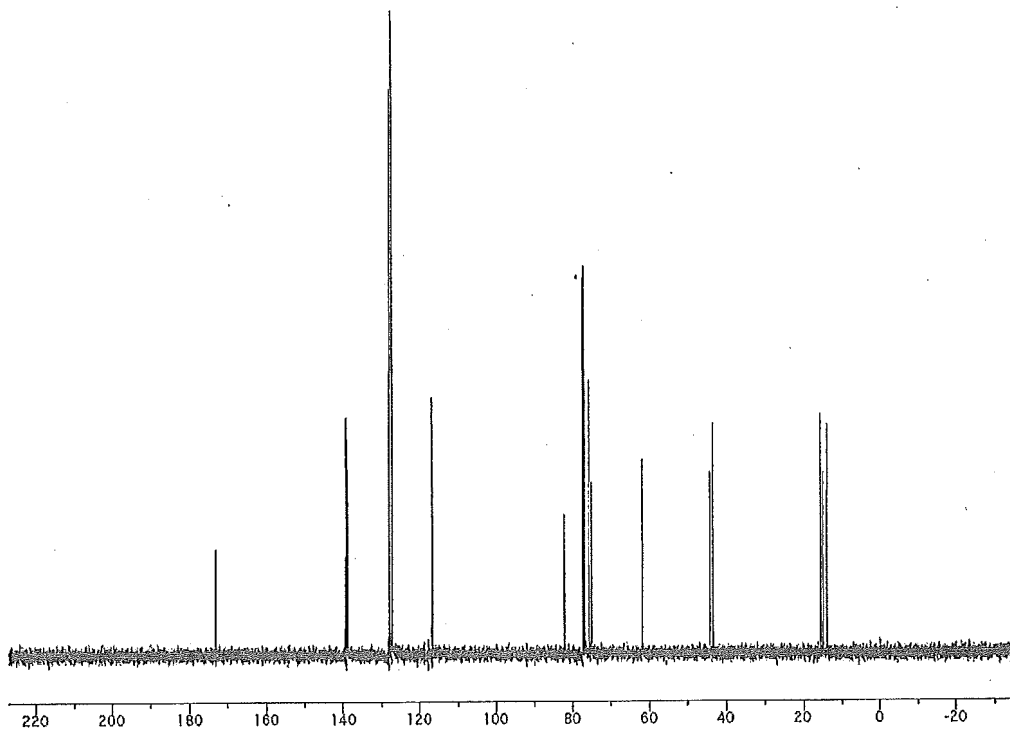

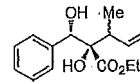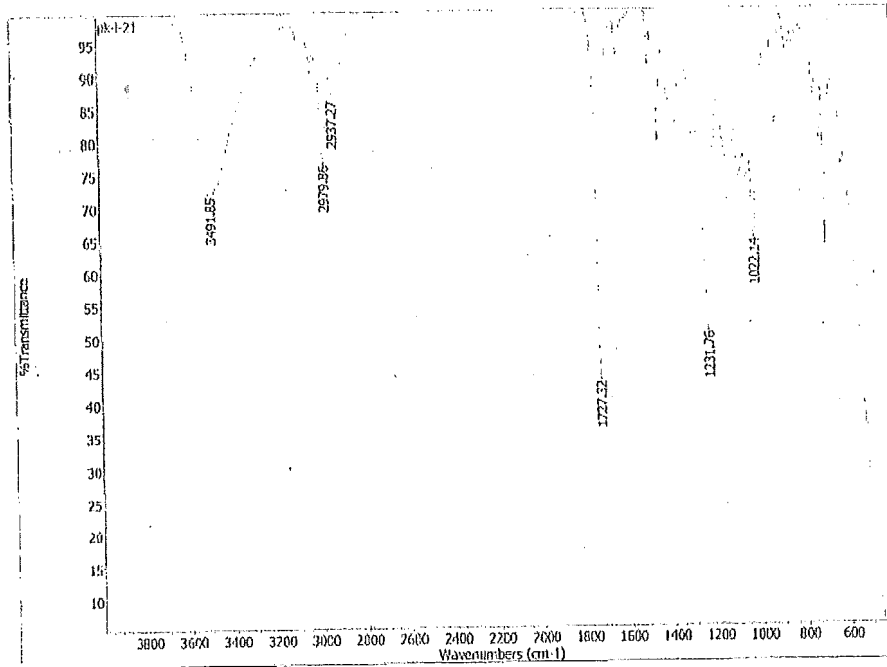

Stanford University Chemistry Department  
Trost Lab HPLC Report

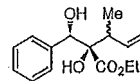

Data File: c:\star\data\shillip\pk-i-68-0d-99-1-081  
 Inj. on Date: 08/16/2009 07:12:41  
 Injection Method: c:\star\data\shillip\right method  
 Run Time (min): 38.547  
 Instrument (inj): Chiral LC Right

Sample Prep Info  
Manual injection

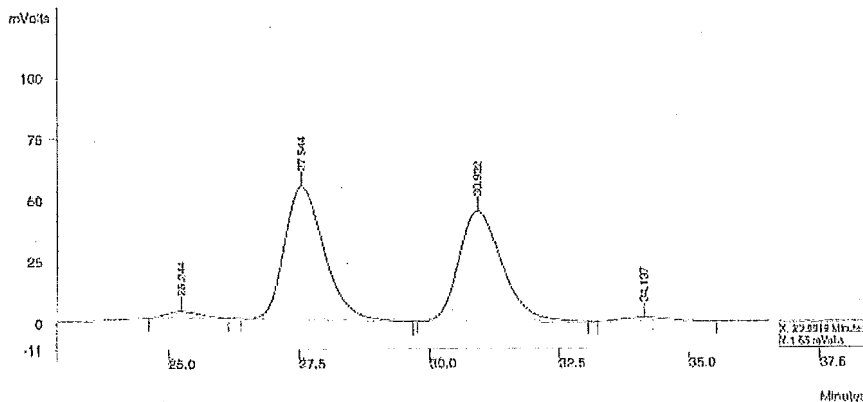

| Peak No | Ret. Time (min) | Peak Area | Width 1/2 (sec) | Percent Area |
|---------|-----------------|-----------|-----------------|--------------|
| 1       | 25.244          | 125335    | 42.4            | 2.33         |
| 2       | 27.544          | 2850485   | 47.6            | 50.76        |
| 3       | 30.922          | 2554486   | 52.4            | 45.49        |
| 4       | 34.137          | 85089     | 49.2            | 1.52         |
|         |                 | 5615415   |                 | 100.00       |

90% ee  
94% ee

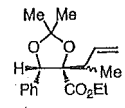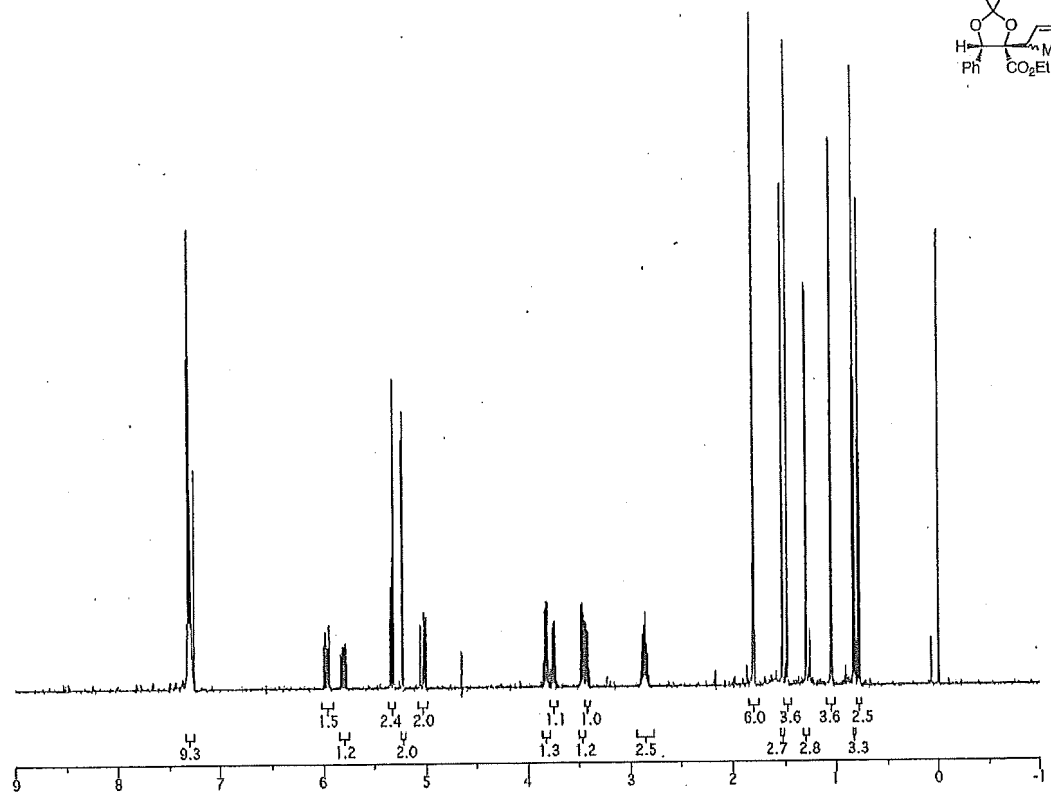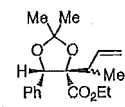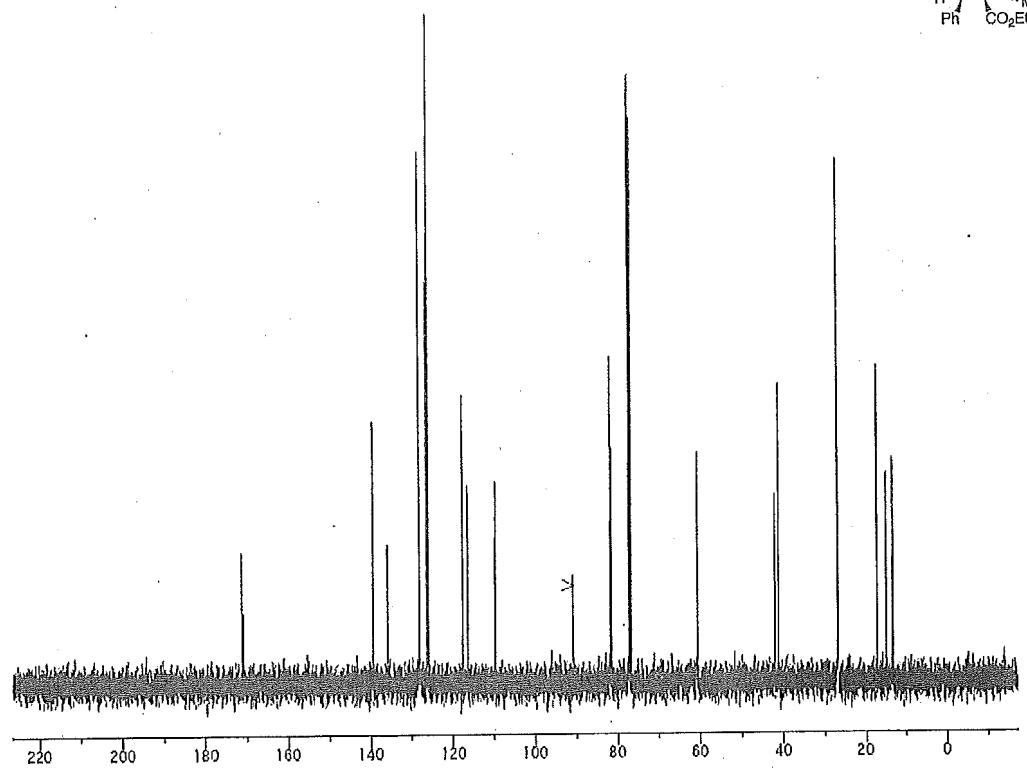



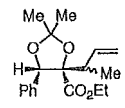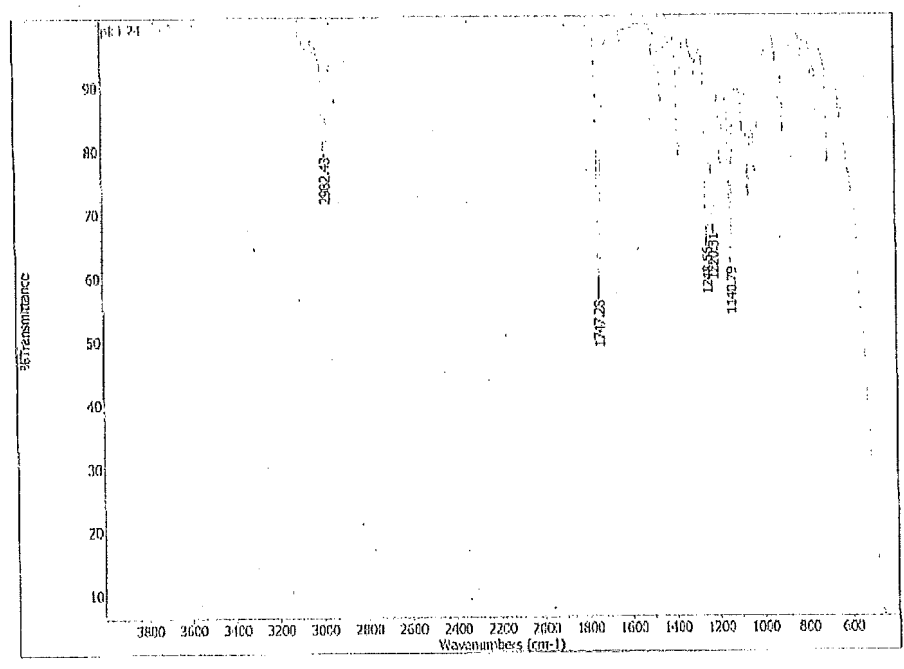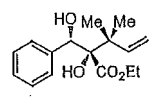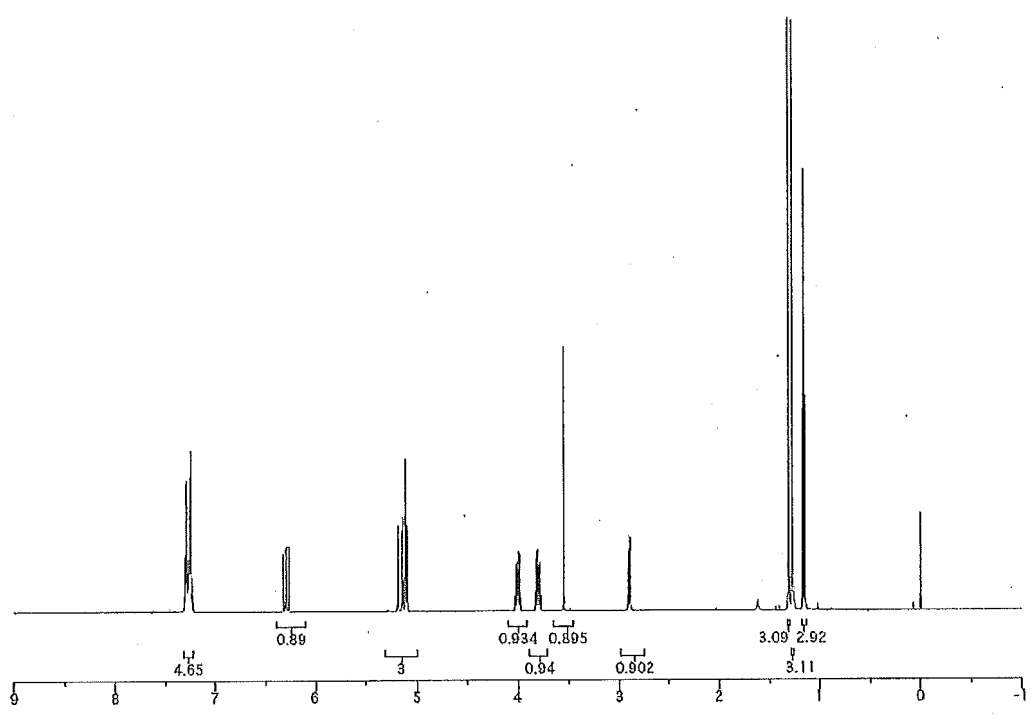

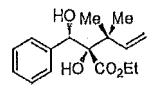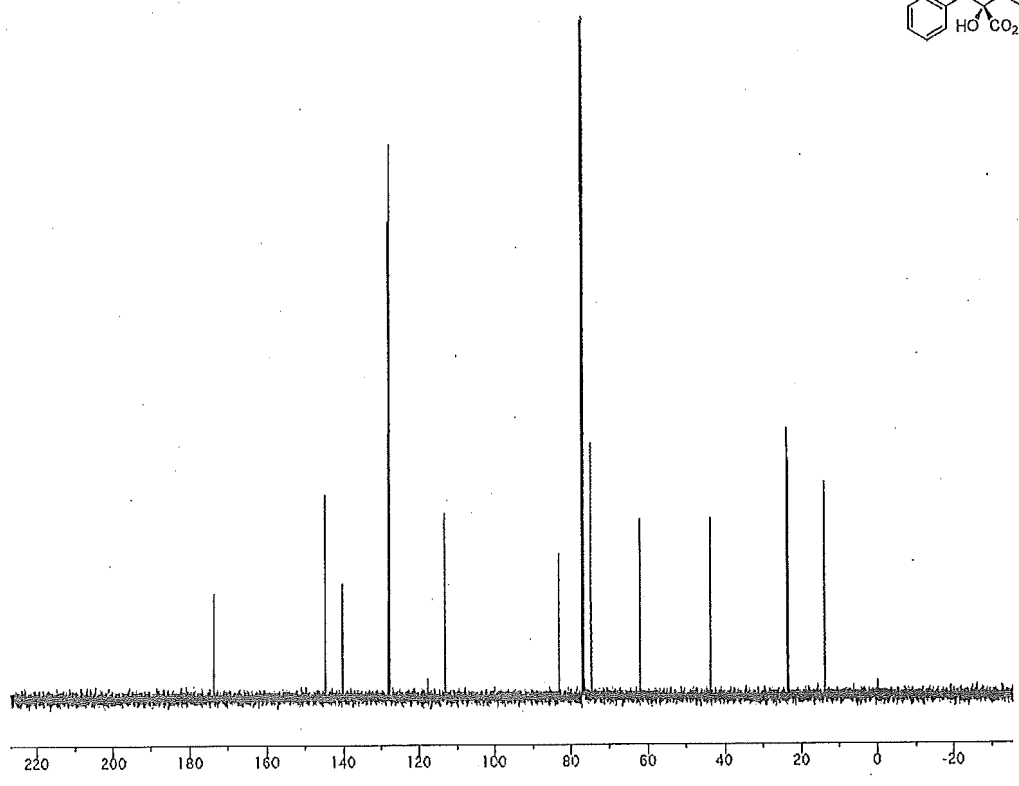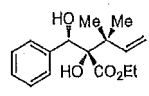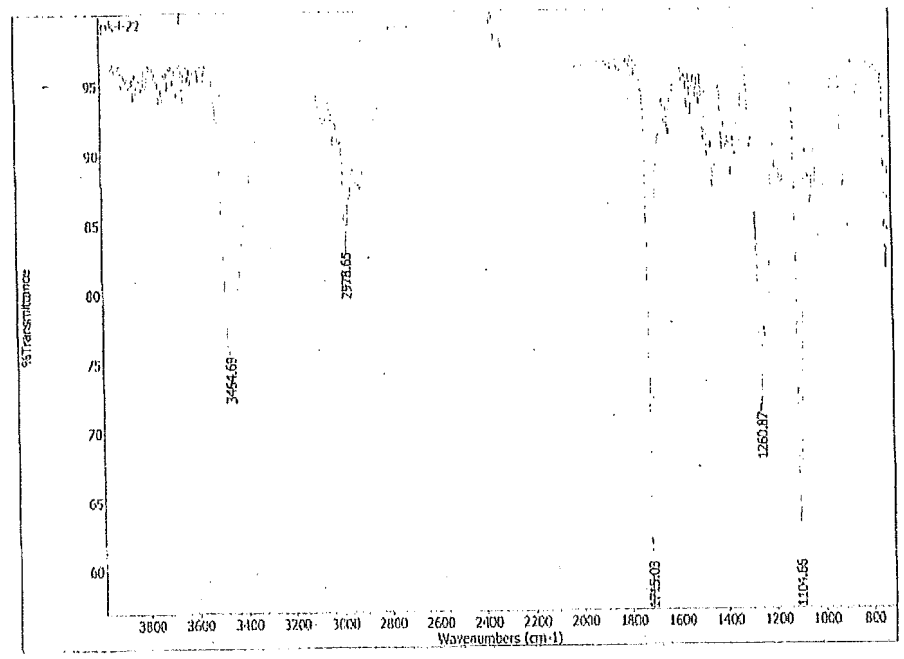

Stanford University Chemistry Department  
Trost Lab HPLC Report

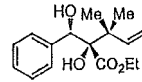

File: e:\sturd\data\pbl\ppk-1-63-1a-90-10-1uhuh-220.i      Sample Prep Info  
 Injection Date: 06/05/2009 06:24:08      Manual Injection  
 Injection Method: e:\sturd\chiral k left method\chiral left  
 Run Time (min): 10.837  
 Instrument (obj): Chiral LC Left

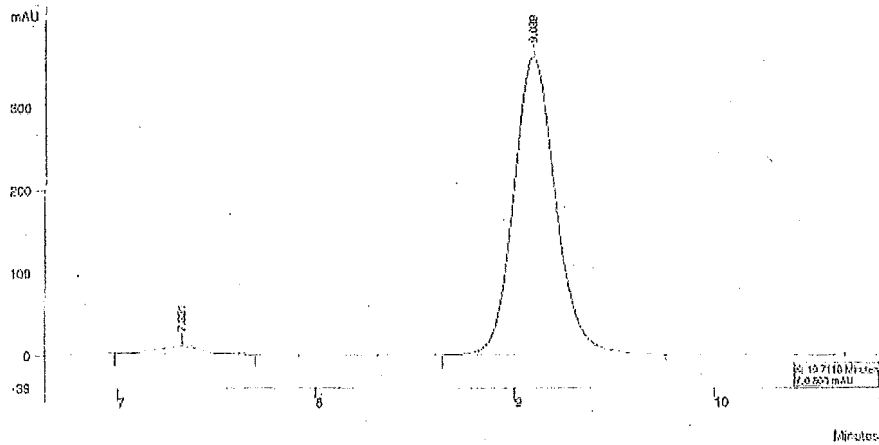

| Peak No | Ret. Time (min) | Width 1/2 (sec) | Peak Area | Percent Area |
|---------|-----------------|-----------------|-----------|--------------|
| 1       | 7.371           | 12.4            | 131852    | 2.45         |
| 2       | 9.089           | 13.2            | 5241158   | 97.55        |
|         |                 |                 | 5373040   | 100.00       |

9.30

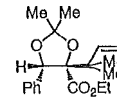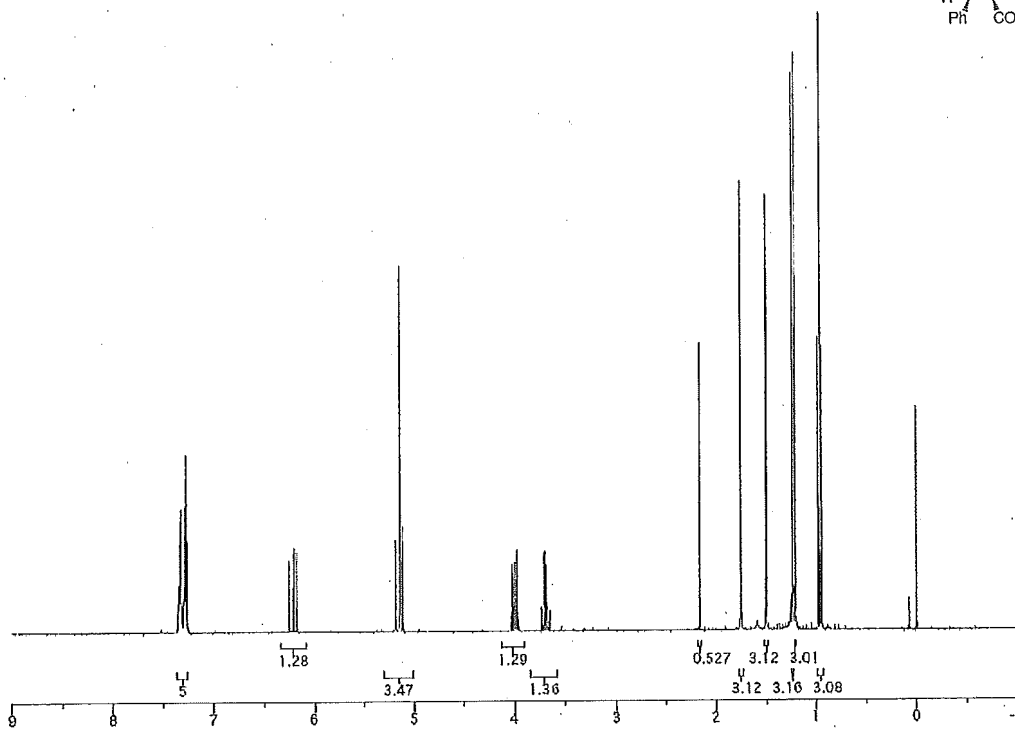

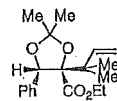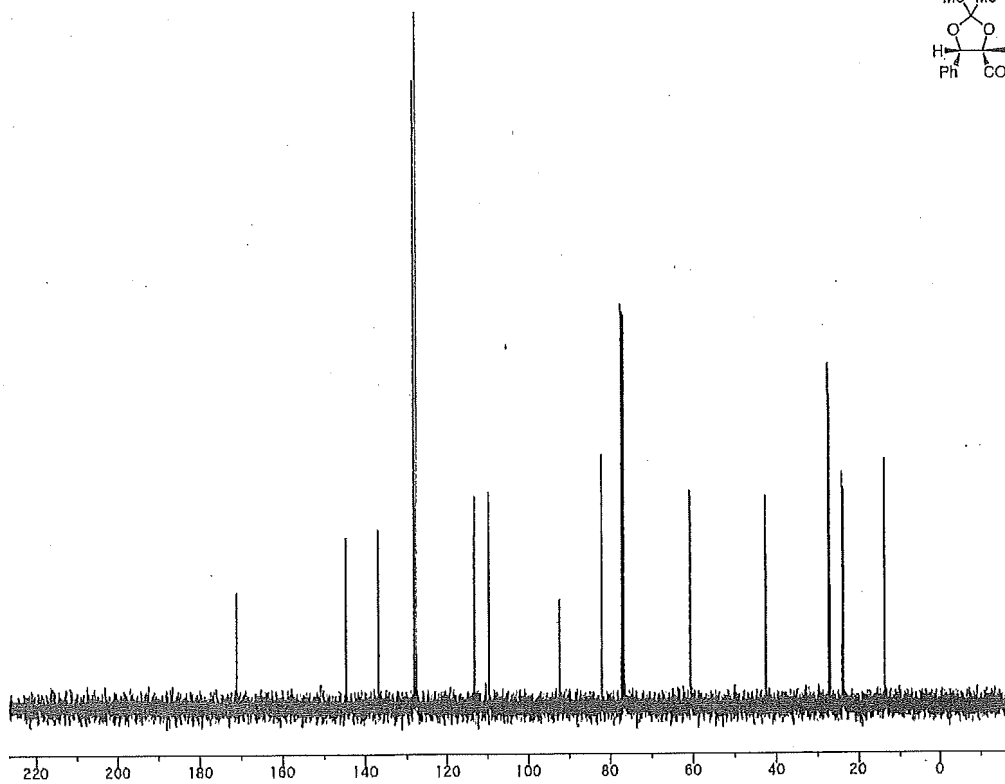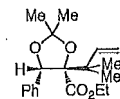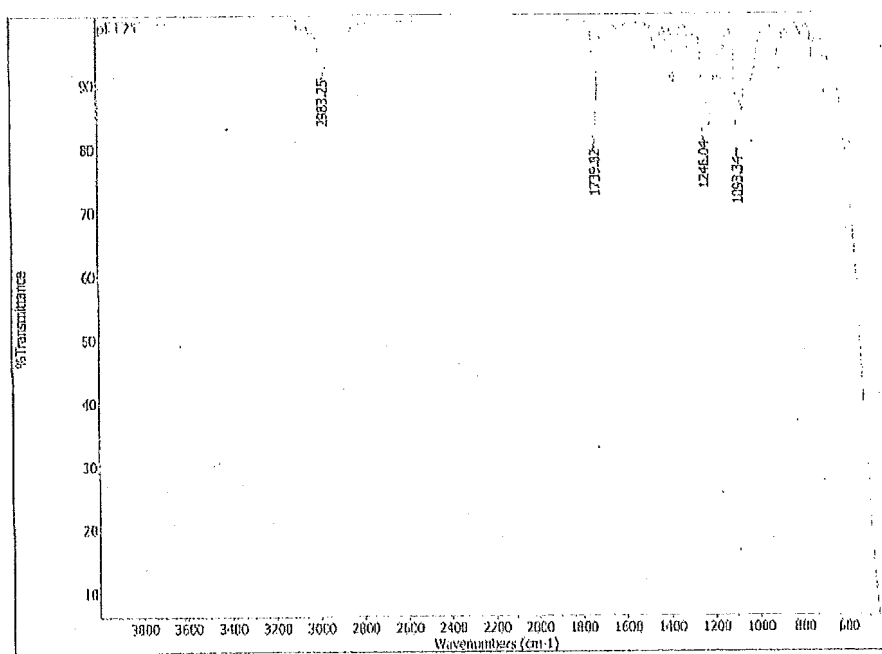

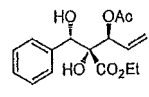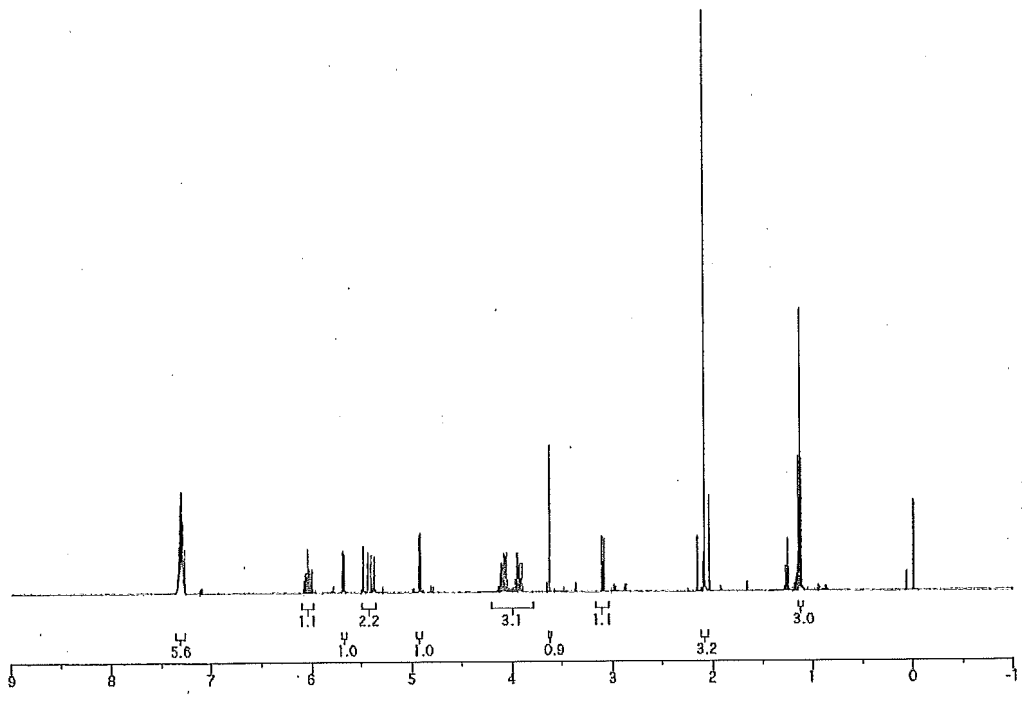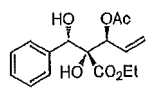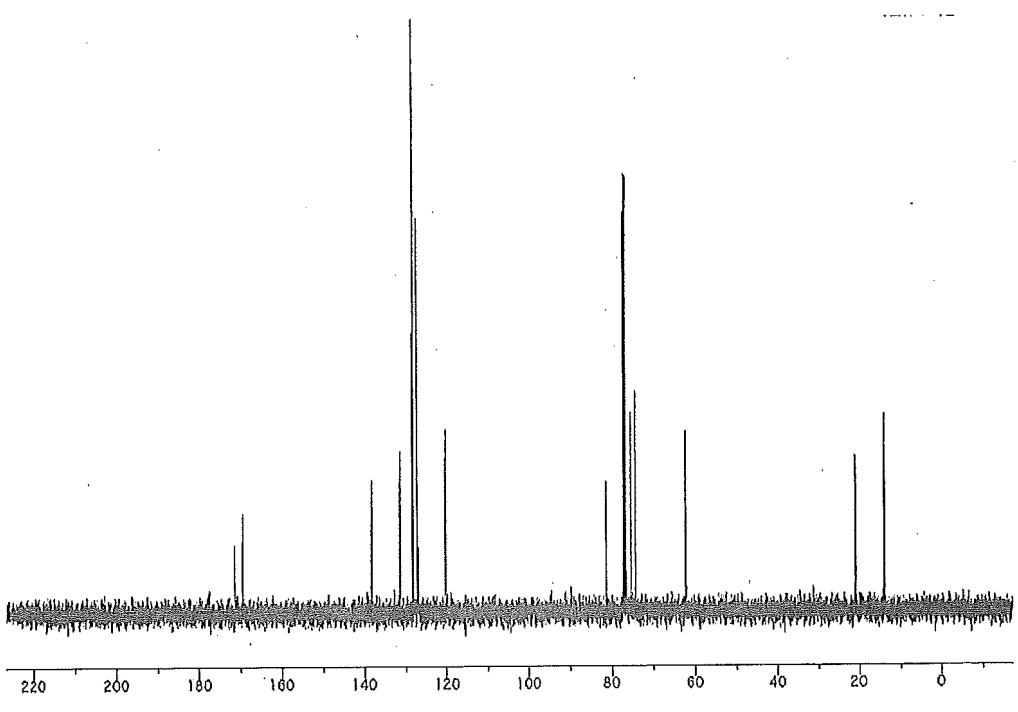

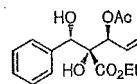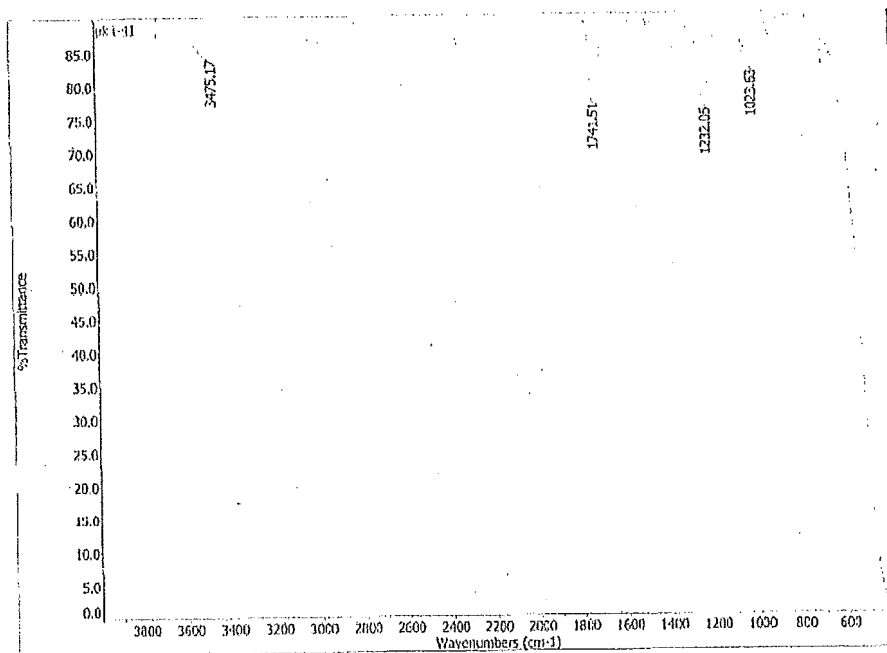

Stanford University Chemistry Department  
Trost Lab HPLC Report

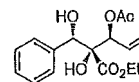

Data File: c:\stan\data\phil\pp\p-1-84-lu-90-10-08mlab-220 Sample Prep Info  
 Injection Date: 08/25/2009 10:54:56 Manual Injection  
 Injection Method: c:\stan\chiral\left\method\chiral left  
 Run Time (min): 33.410  
 Instrument (Lab): Chiral LC Left

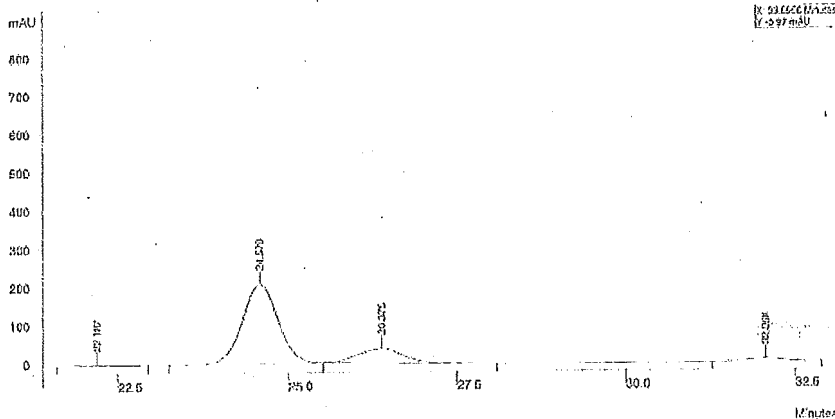

| Peak No | Ret. Time (min) | Width 1/2 (sec) | Peak Area | Percent Area |
|---------|-----------------|-----------------|-----------|--------------|
| 1       | 22.187          | 49.0            | 83782     | 0.87         |
| 2       | 24.579          | 33.6            | 7497301   | 78.72        |
| 3       | 26.375          | 41.2            | 1635526   | 17.07        |
| 4       | 32.058          | 39.0            | 318524    | 3.34         |
|         |                 |                 | 9524133   | 100.00       |

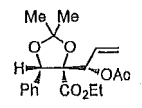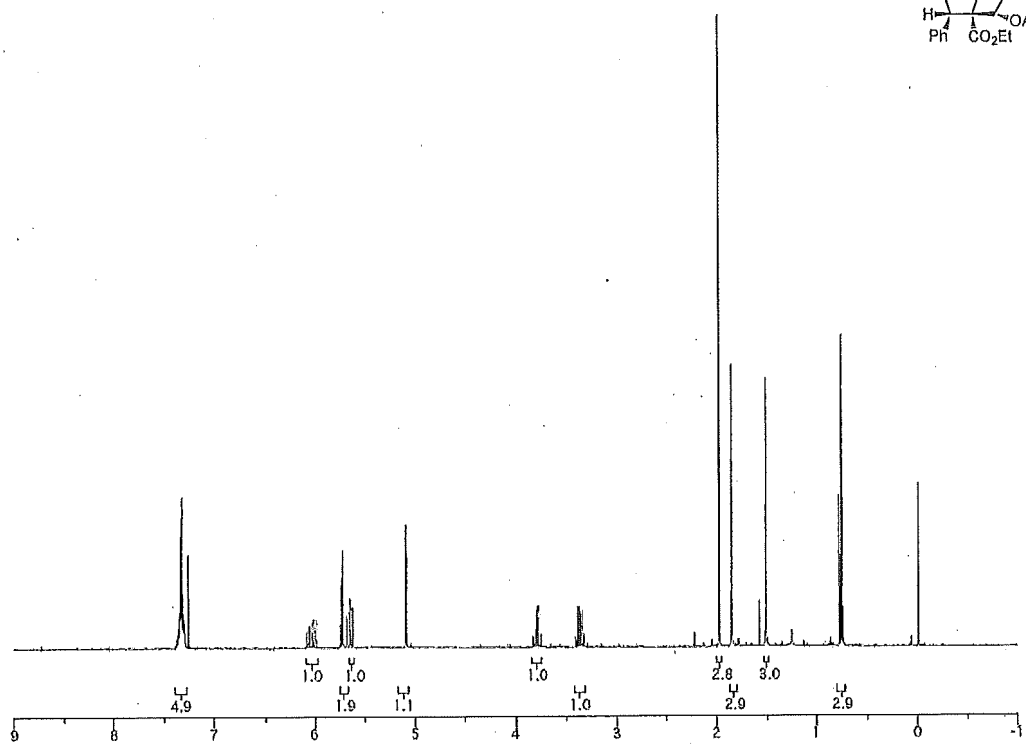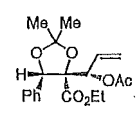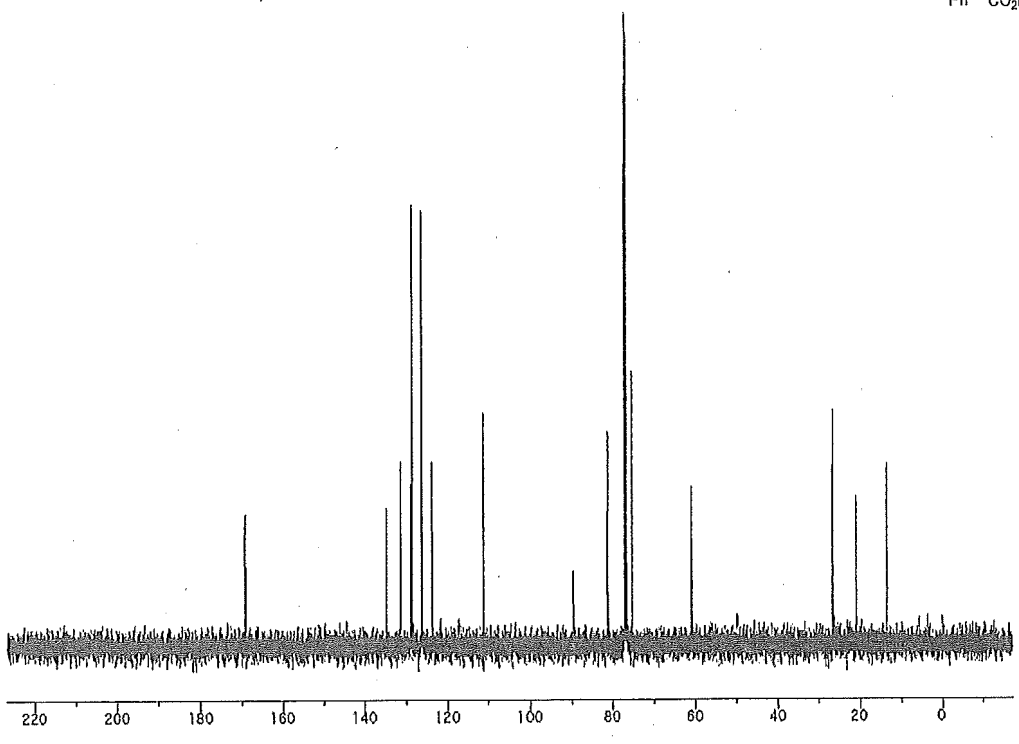

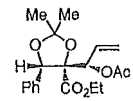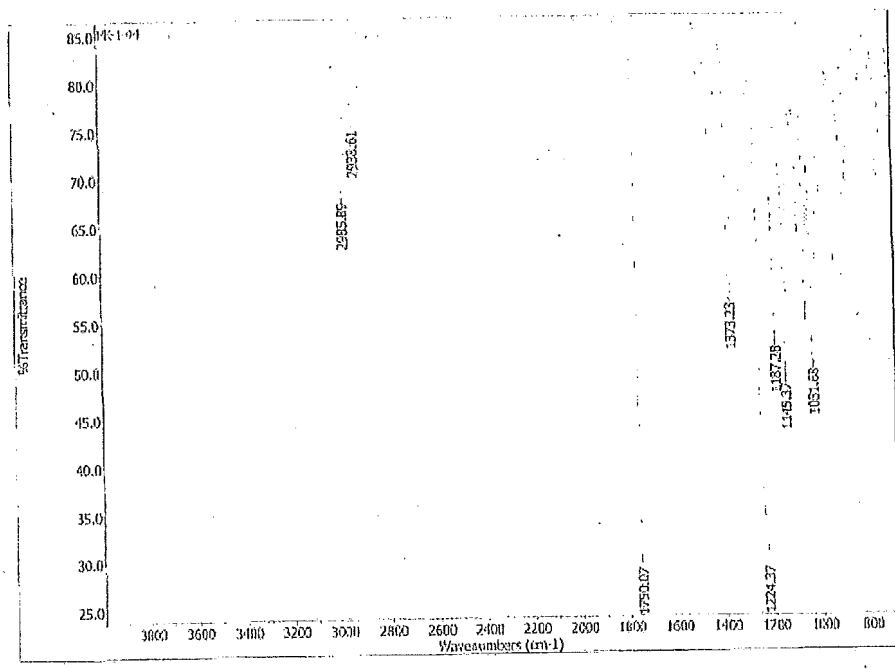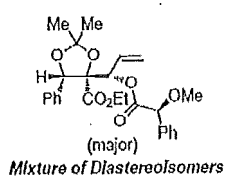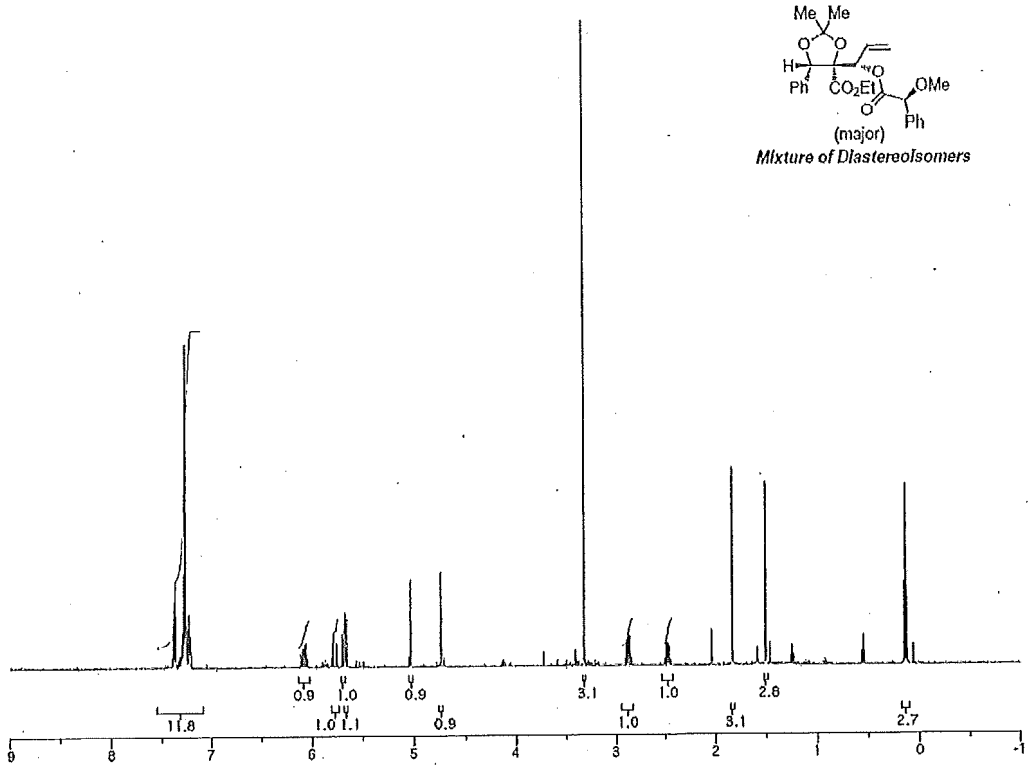



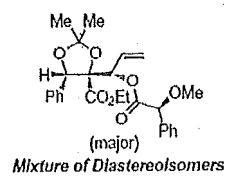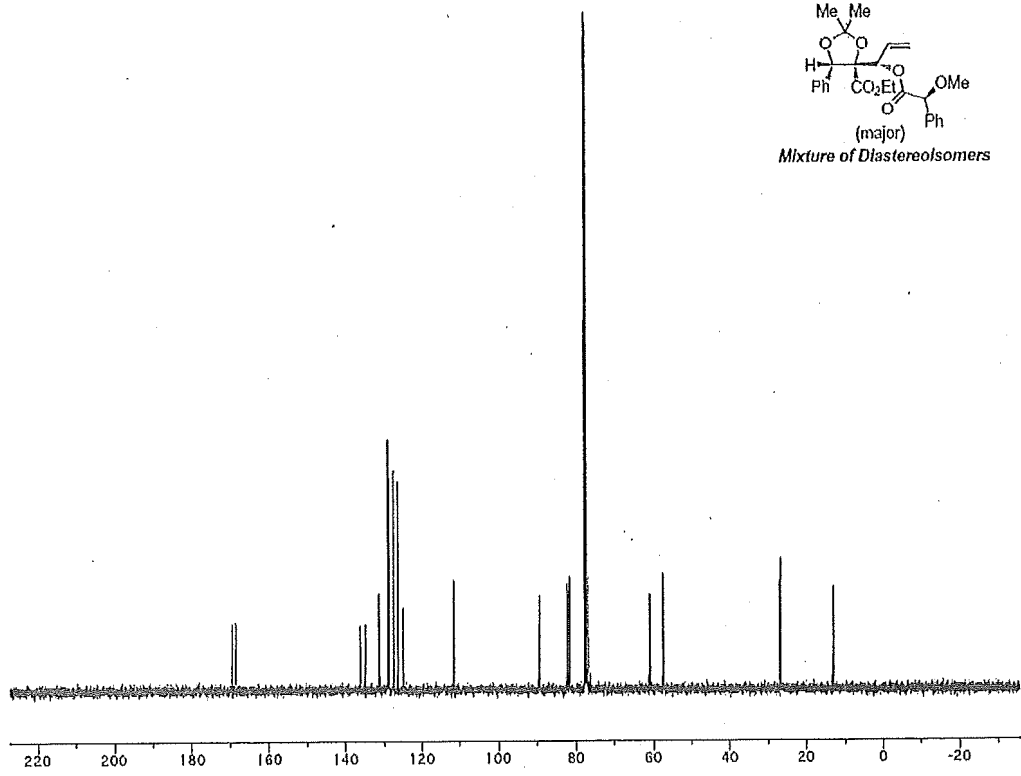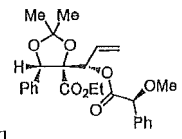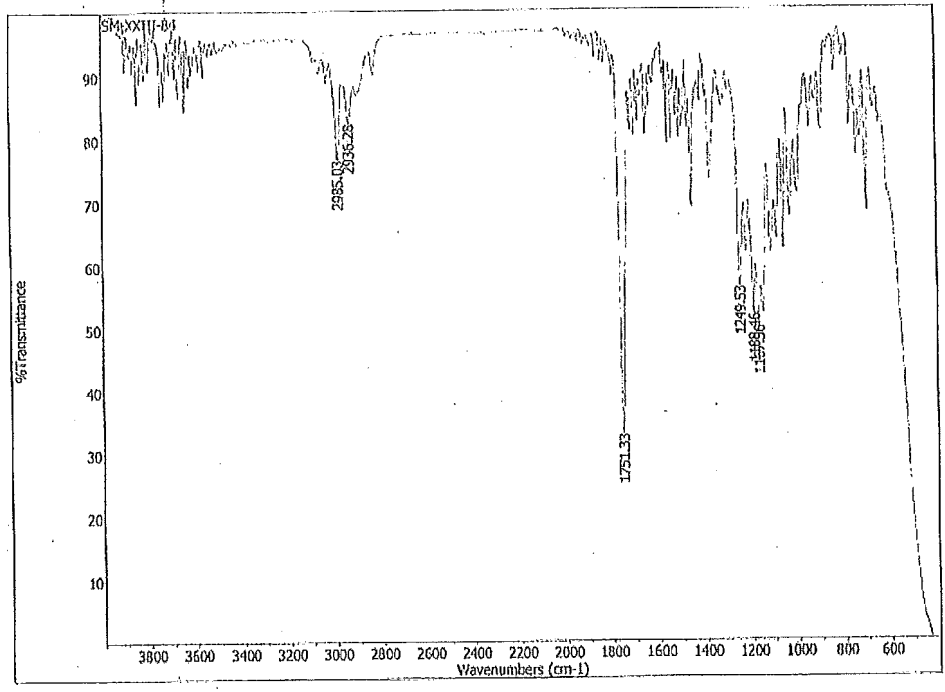

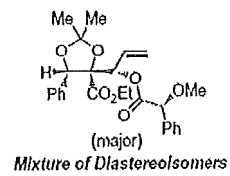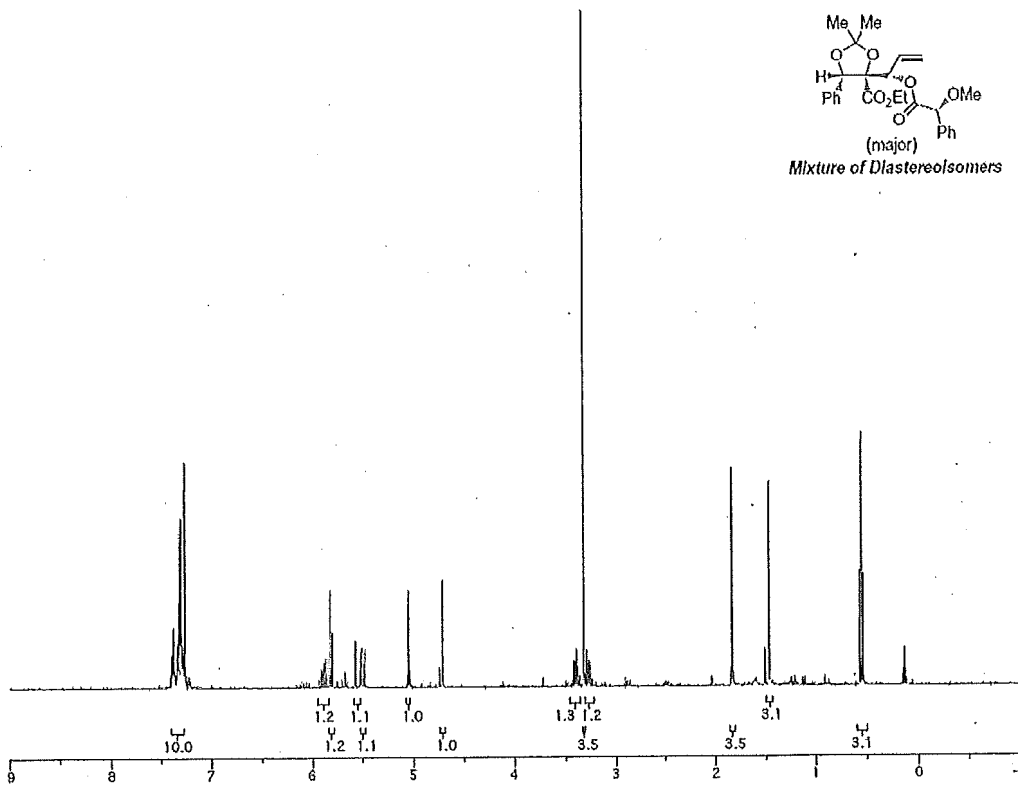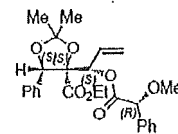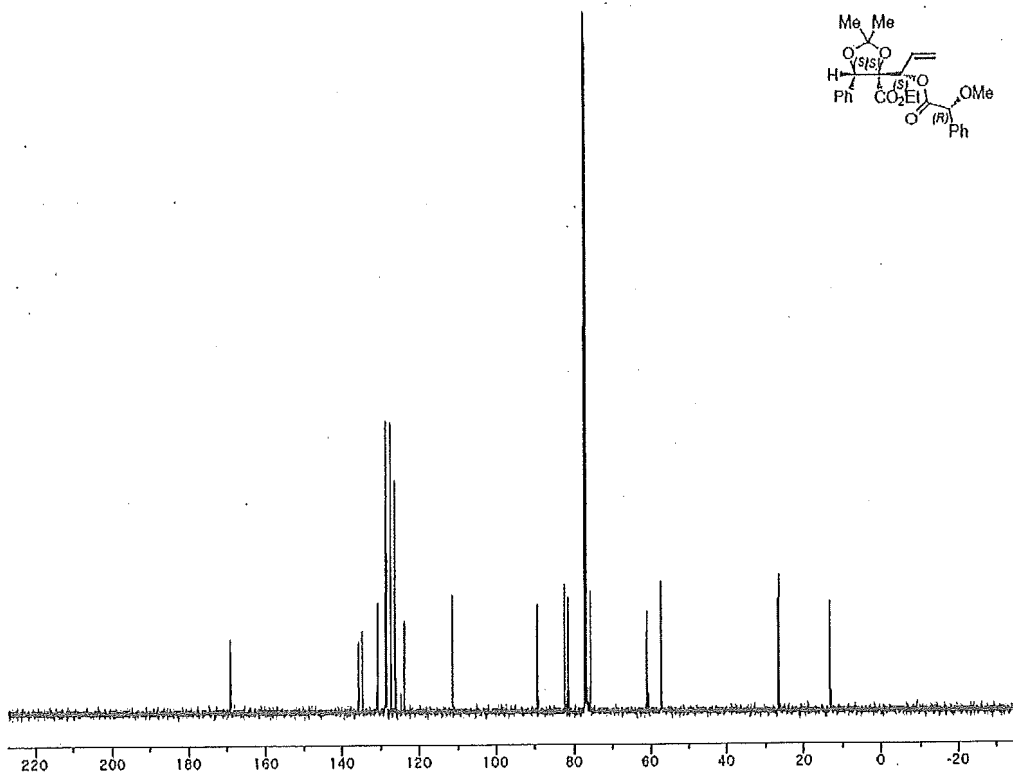

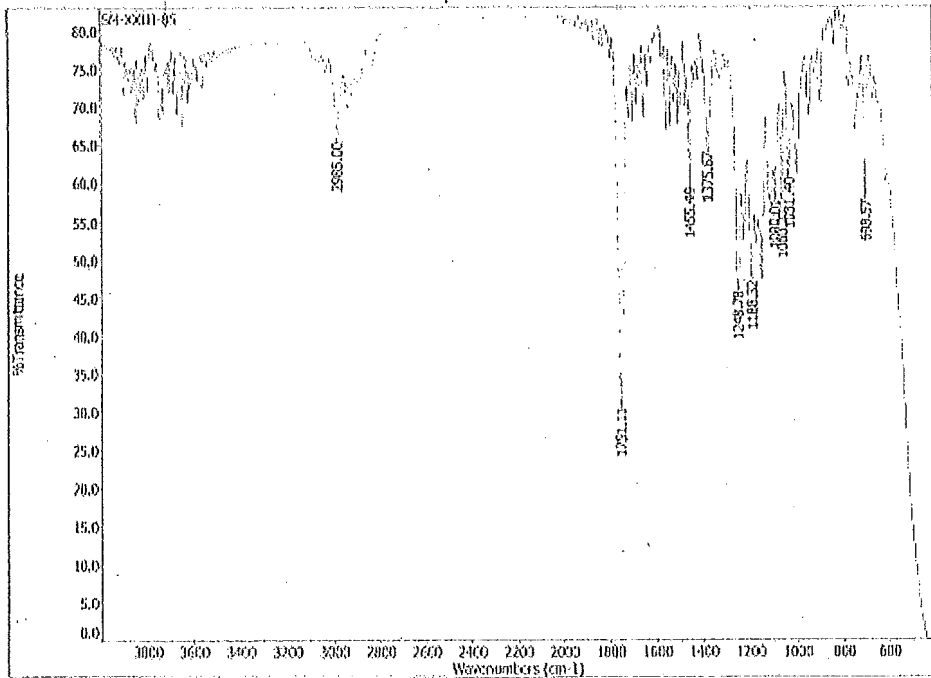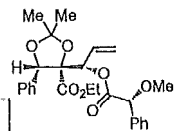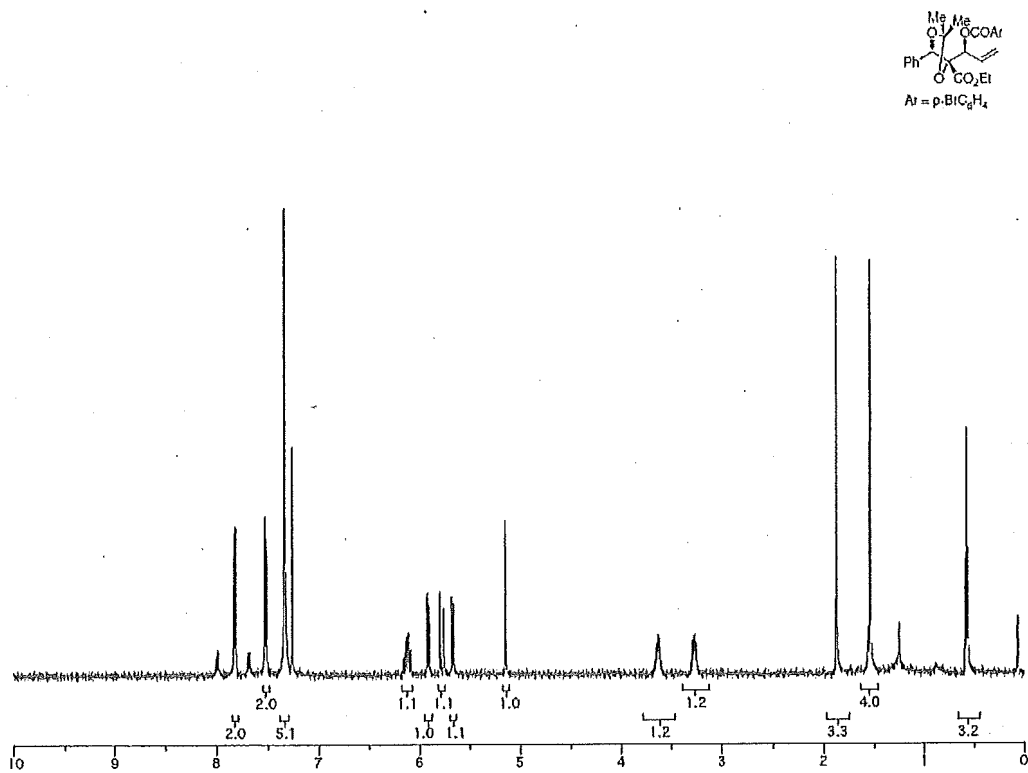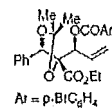

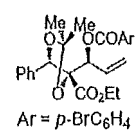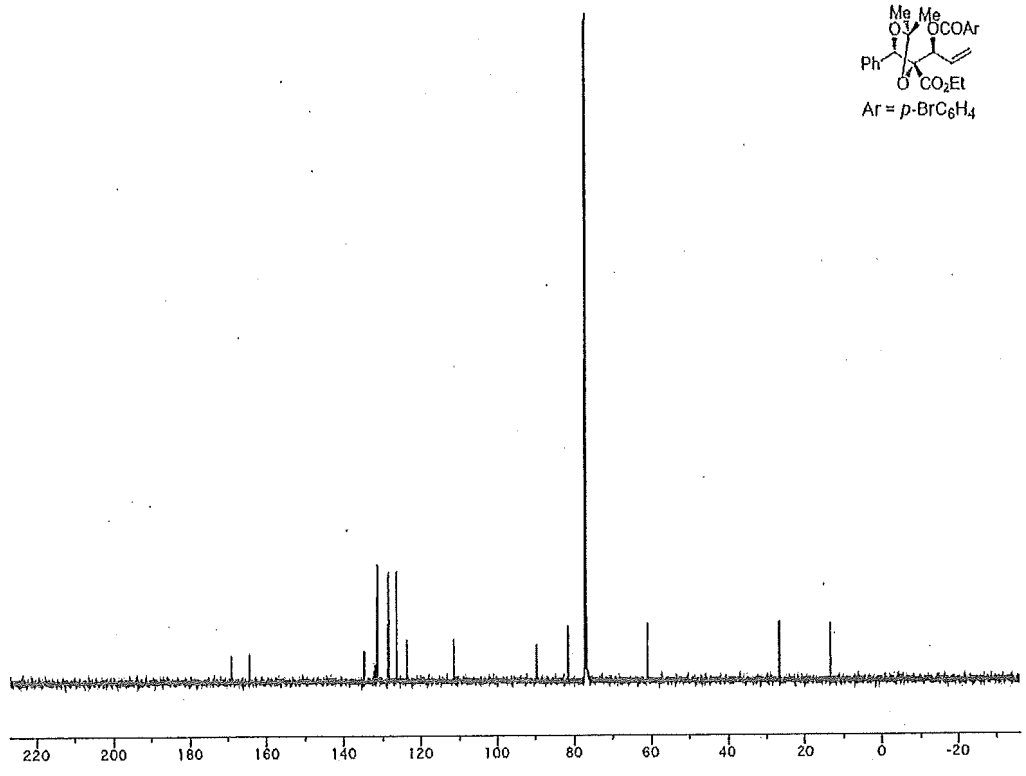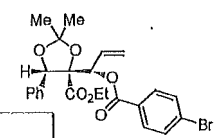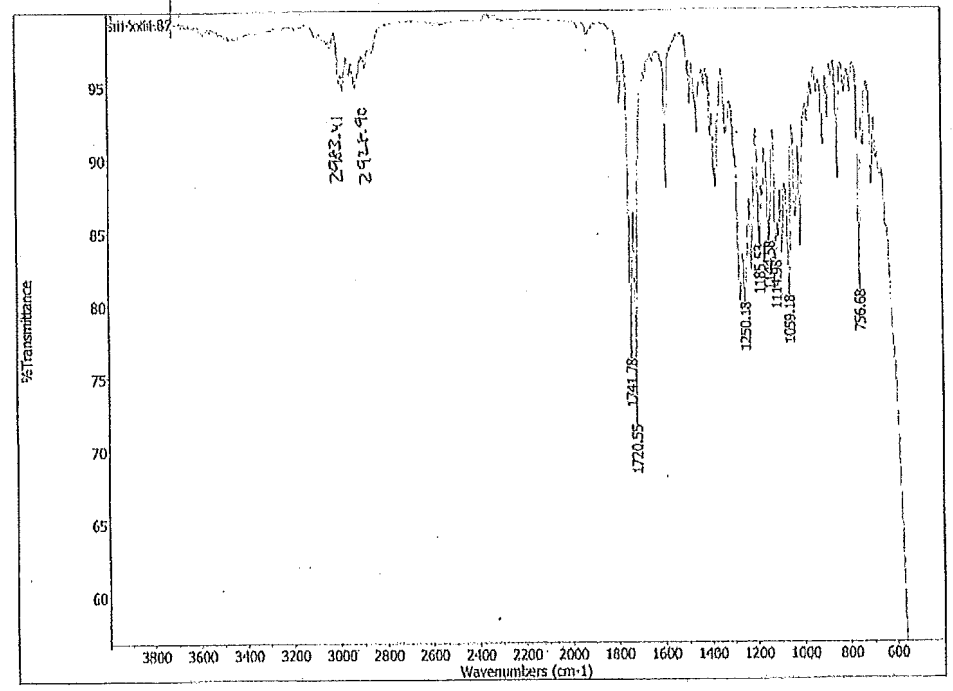

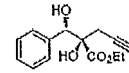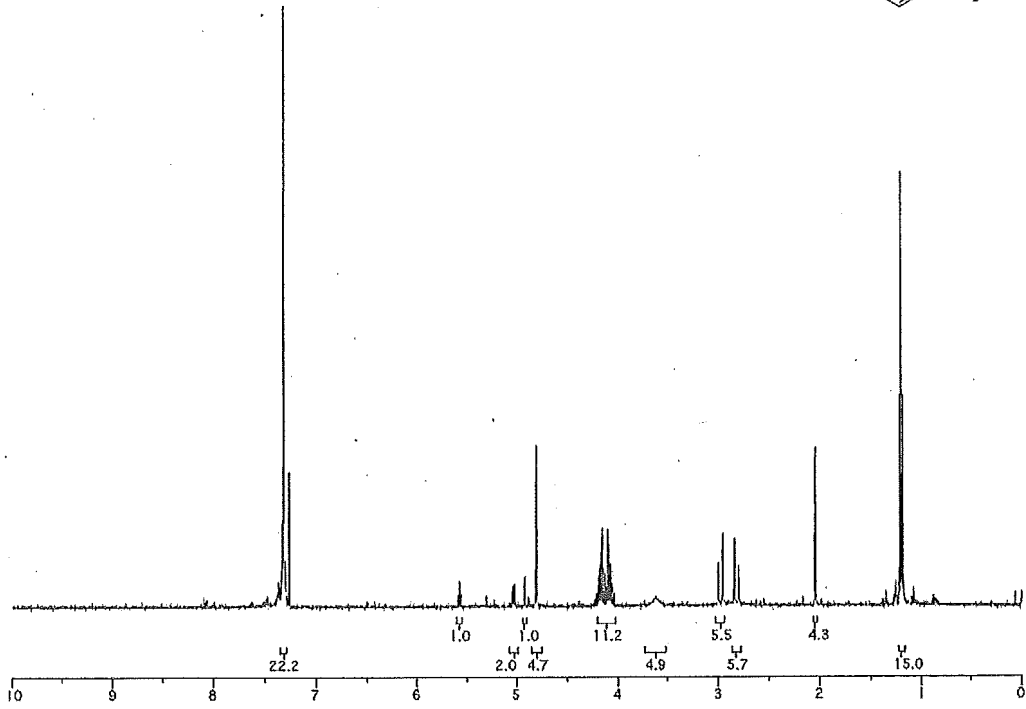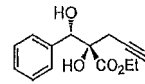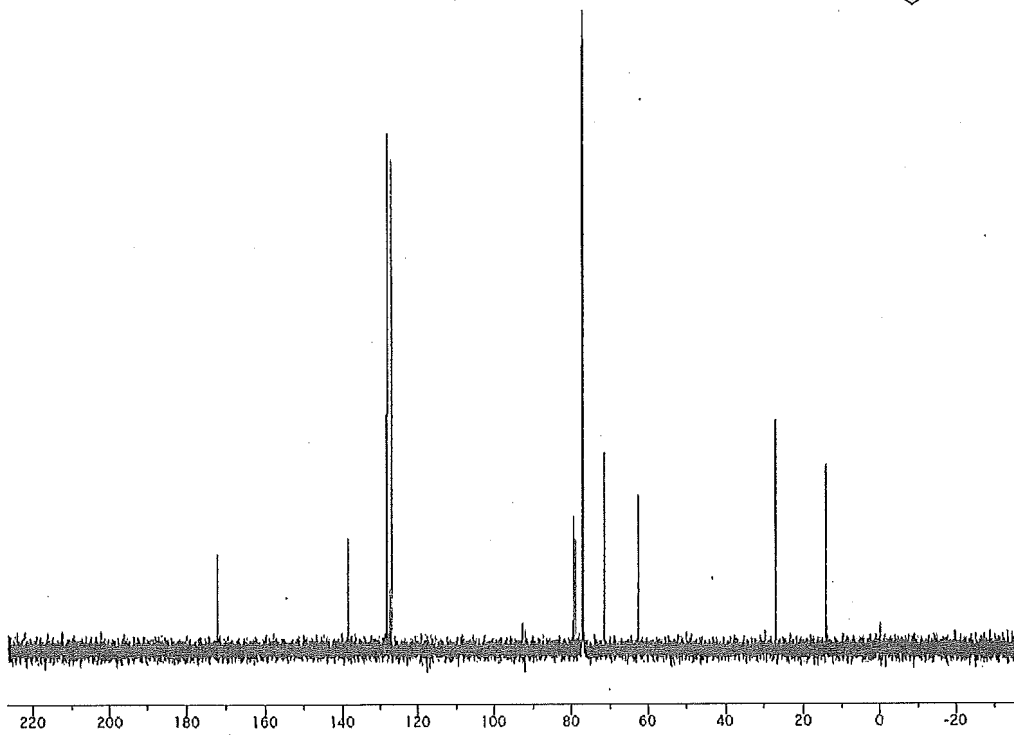

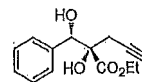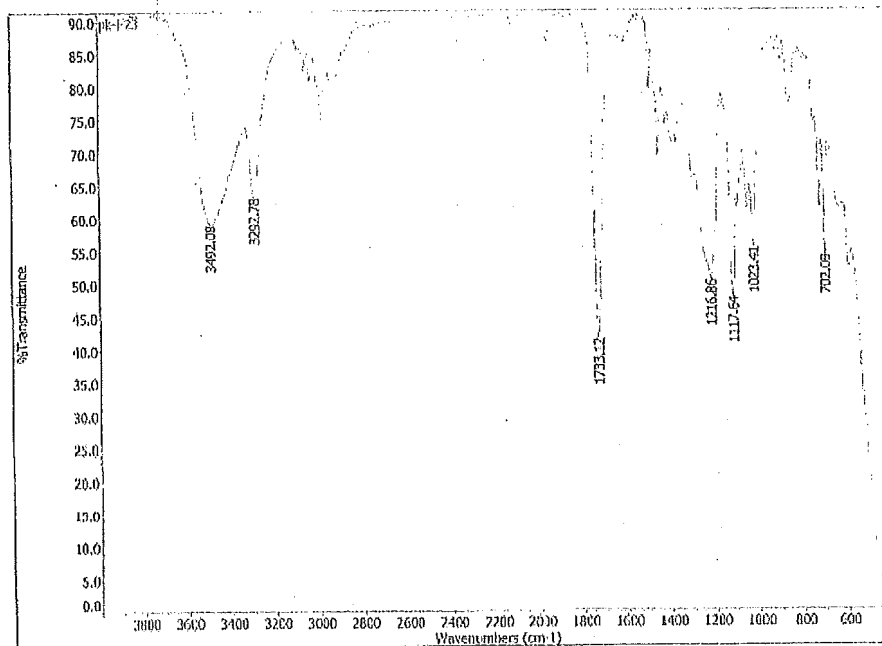

Stanford University Chemistry Department  
Trost Lab HPLC Report

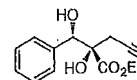

Data File: c:\star\data\hplc\pk-1-78-01-90-10-08  
Inj. In Date: 06/20/2009 05:32:51  
Injection Method: c:\star\data\hplc\chiral right method  
Run Time (min): 42.491  
Instrument (Inj): Chiral LC Right

Sample Prep Info  
Manual injection

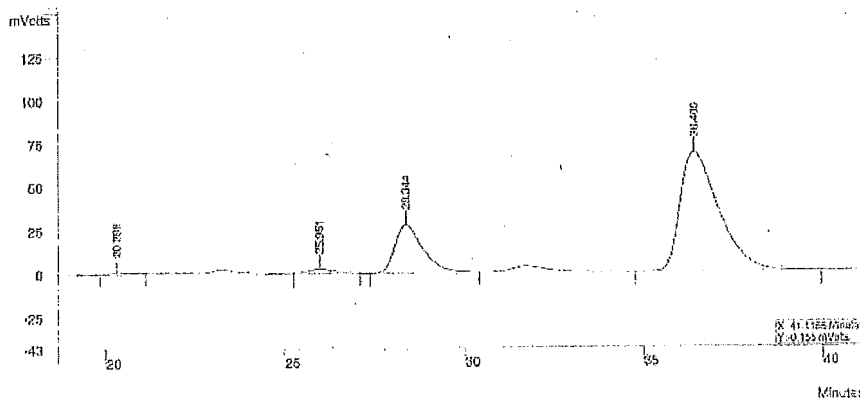

| Peak No | Ret. Time (min) | Peak Area | Width 1/2 (sec) | Percent Area |
|---------|-----------------|-----------|-----------------|--------------|
| 1       | 20.298          | 26083     | 57.7            | 0.39         |
| 2       | 25.951          | 107770    | 38.9            | 1.60         |
| 3       | 28.344          | 1469270   | 48.6            | 21.85        |
| 4       | 36.409          | 5121055   | 68.4            | 70.16        |
|         |                 | 6724178   |                 | 100.00       |

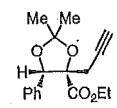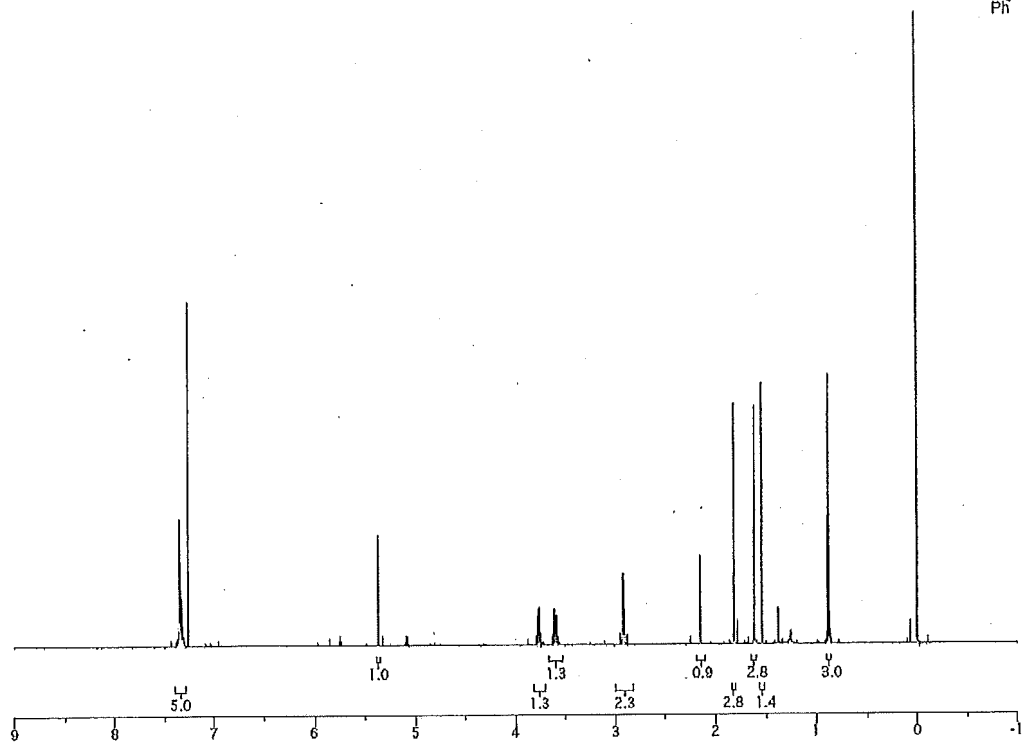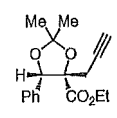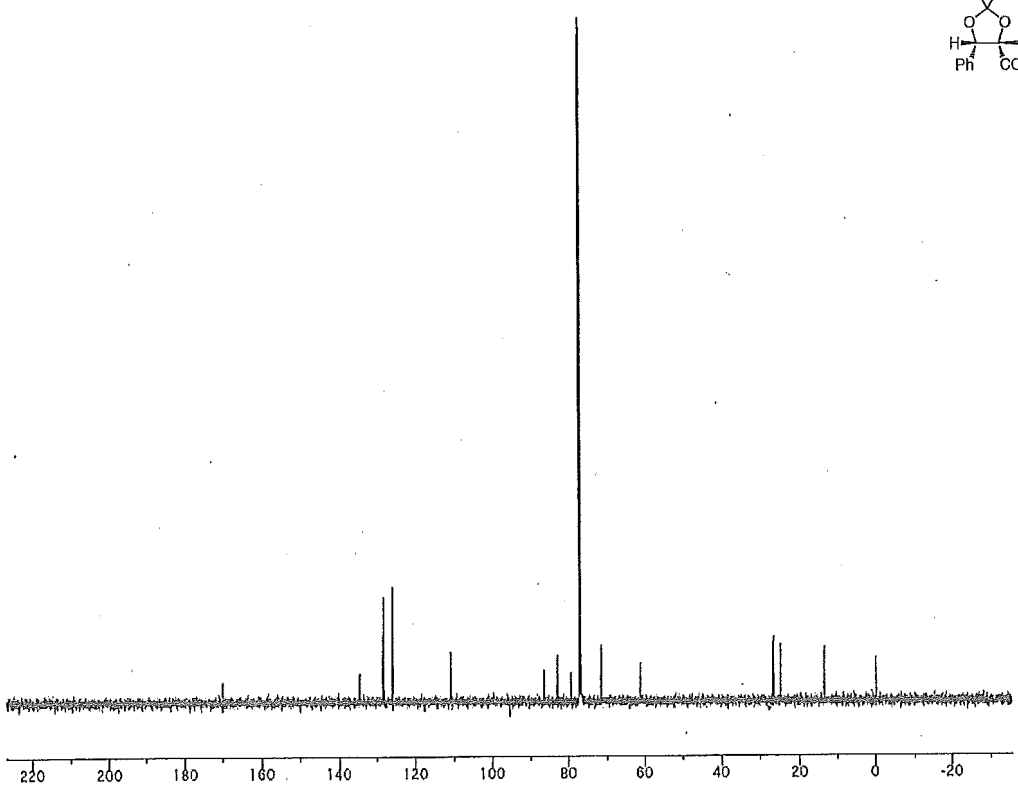

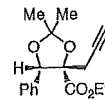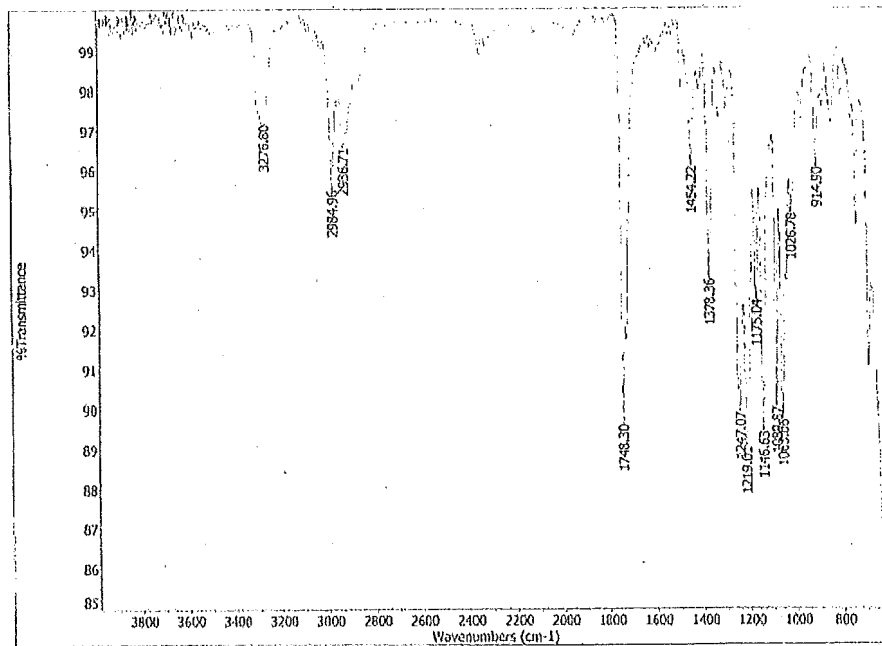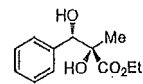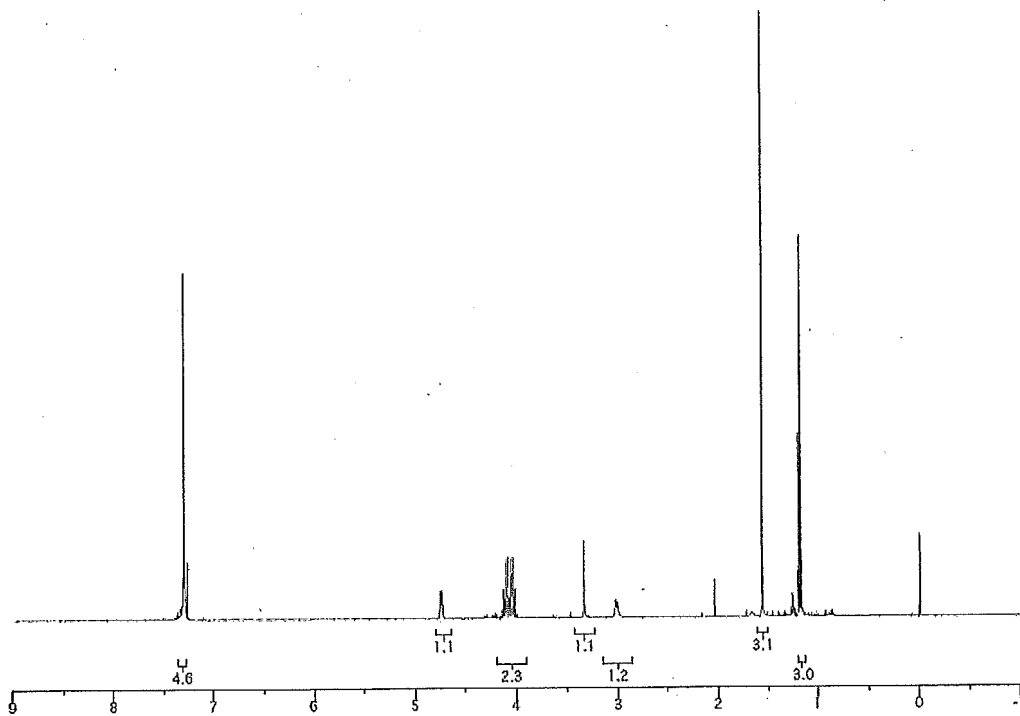



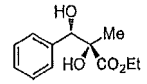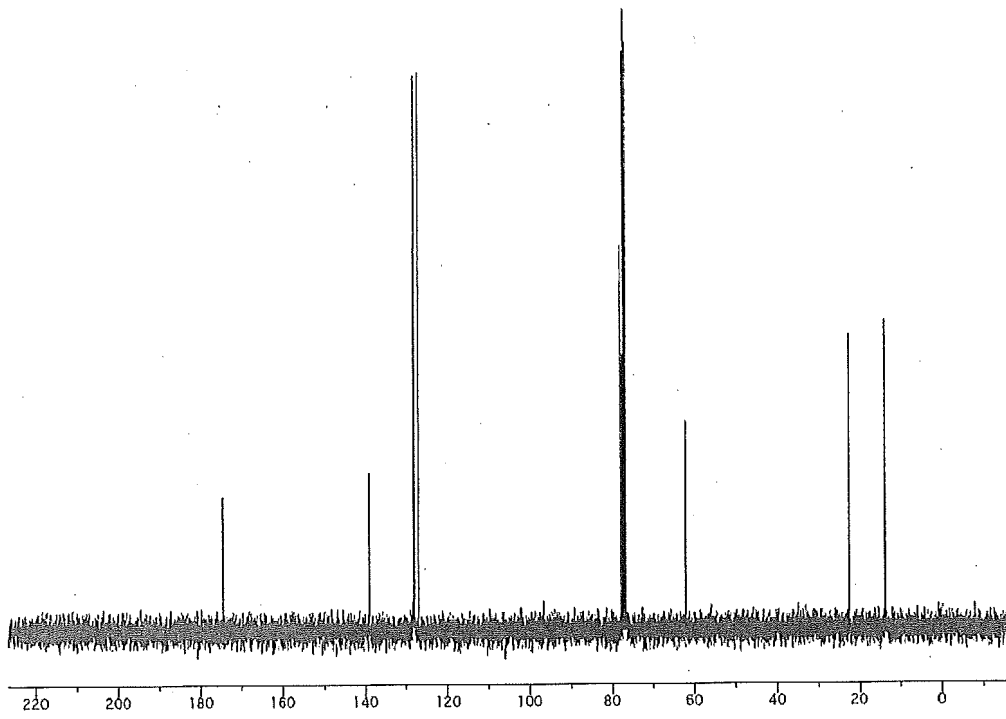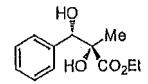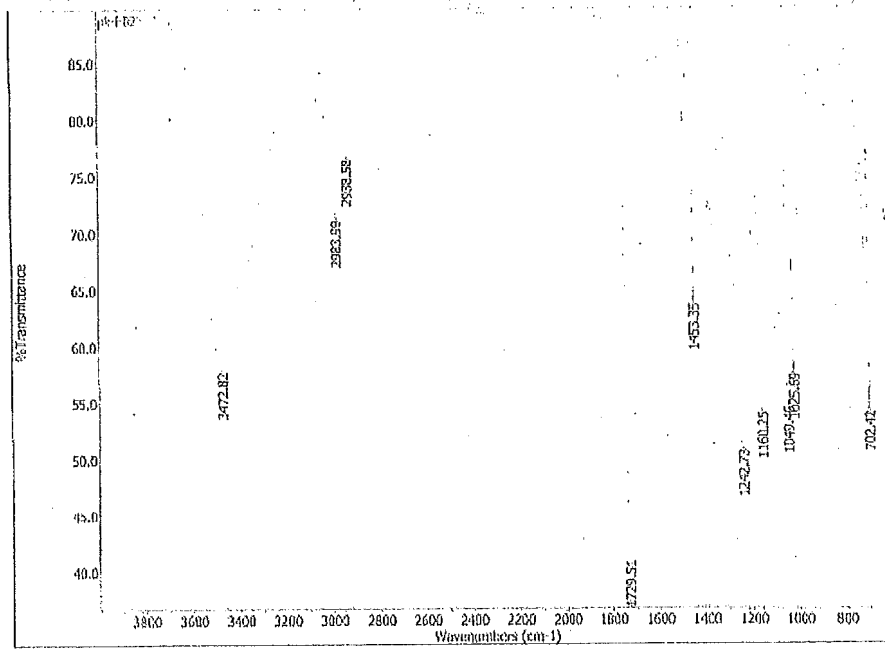

Stanford University Chemistry Department  
Trost Lab HPLC Report

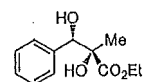

Data File: e:\star\data\phillip\ok-1-83-ad-90-10-01  
 Injection Date: 06/25/2009 11:08:04  
 Injection Method: e:\star\data\phillip\chiral right method  
 Run Time (min): 21.188  
 Instrument (Unit): Chiral LC Right

Sample Prep Info  
Manual Injection

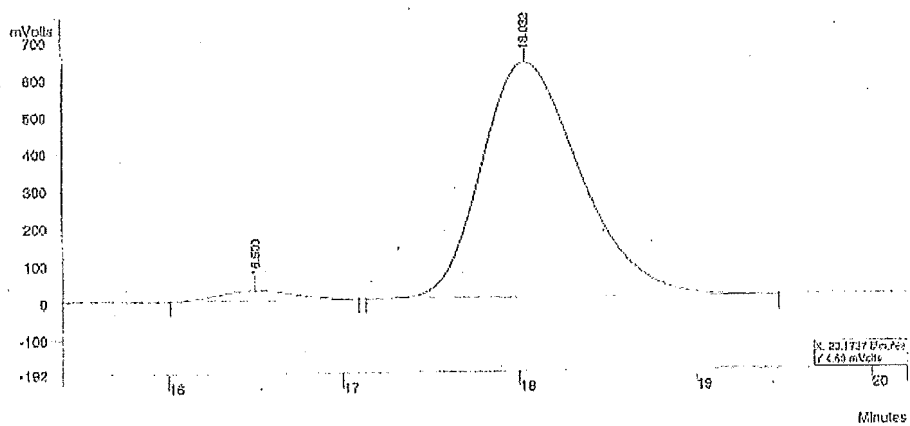

| Peak No | Ret. Time (min) | Peak Area | Width 1/2 (sec) | Percent Area |
|---------|-----------------|-----------|-----------------|--------------|
| 1       | 16.500          | 786451    | 29.3            | 3.15         |
| 2       | 18.032          | 24142964  | 35.5            | 96.85        |
|         |                 | 24929416  |                 | 100.00       |

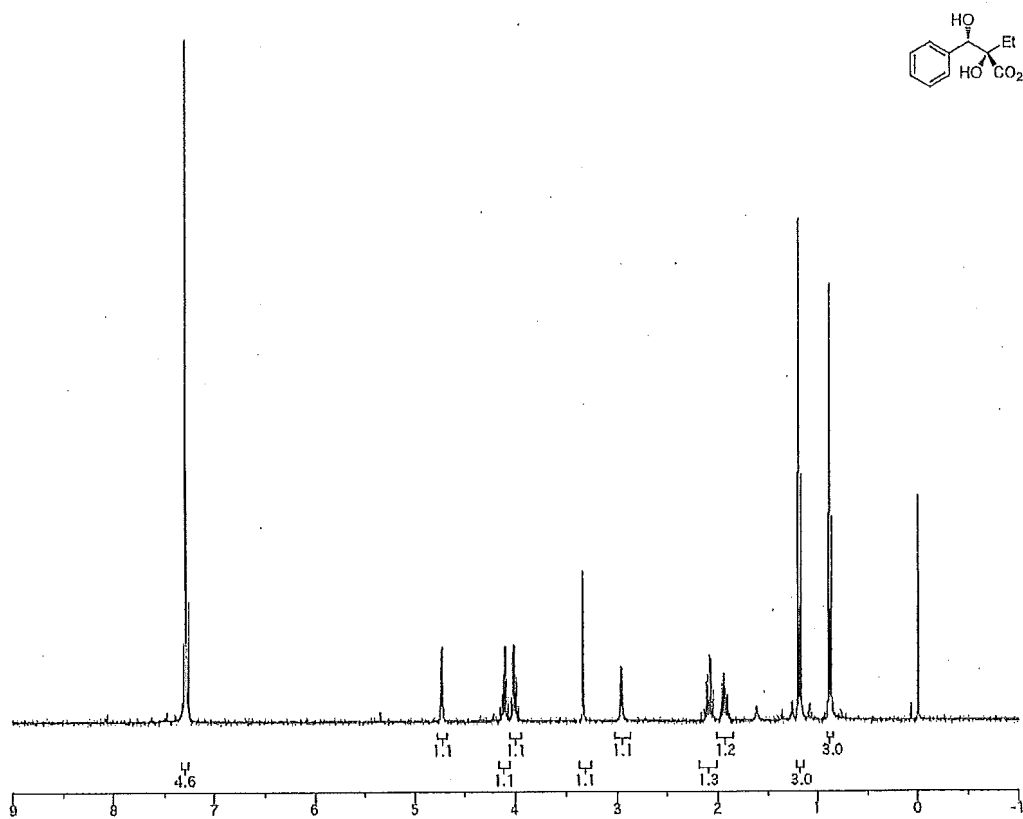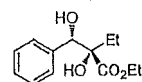

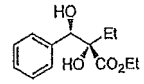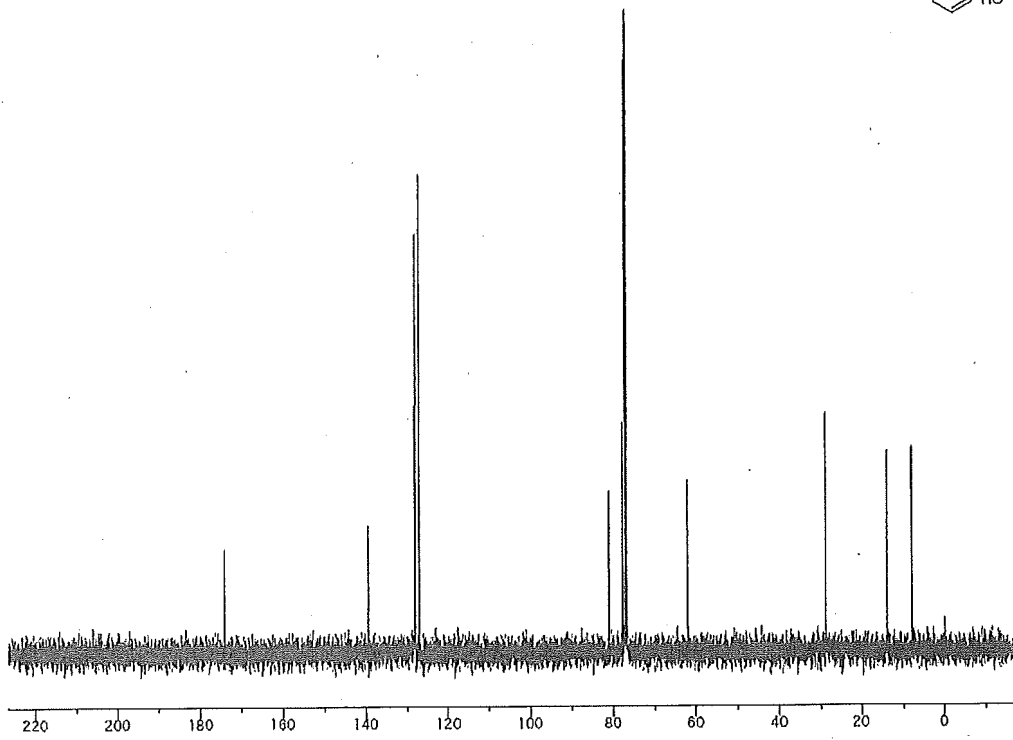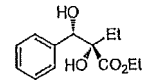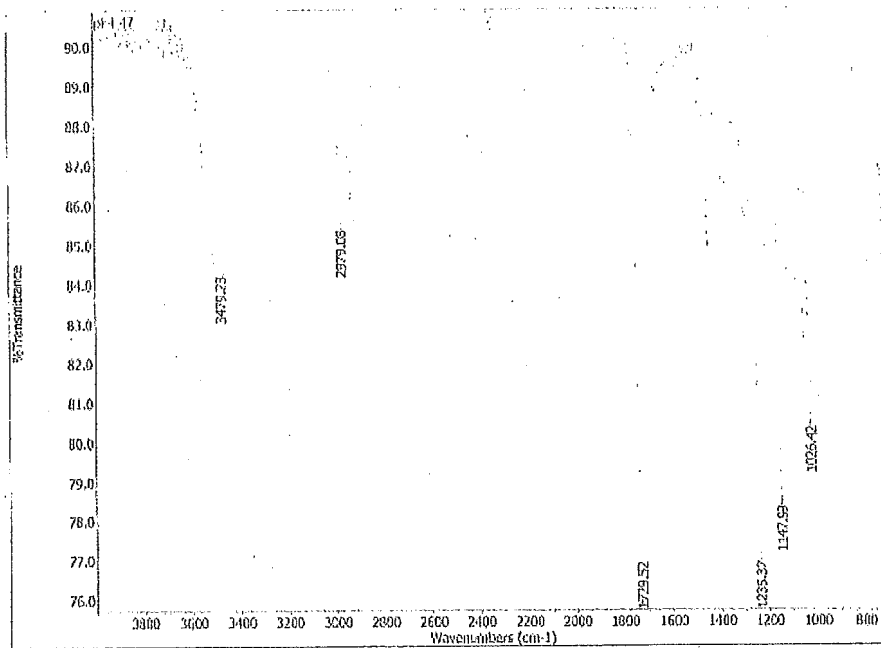

Stanford University Chemistry Department  
Trost Lab HPLC Report

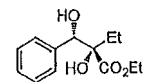

Data File: e:\star\data\philip\pk-1-81-ad-90-10-1r  
 In' on Date: 06/22/2009 07:21:59  
 In' on Method: e:\star\data\philip\chiral.rpt method  
 Run Time (min): 17.183  
 Instrument (Unit): Chiral LC Right

Sample Prep Info  
Manual Injection

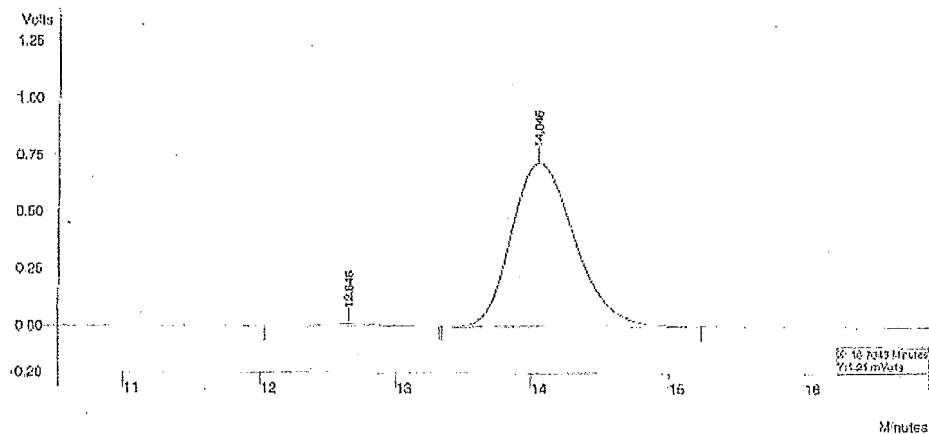

| Peak No | Ret. Time (min) | Peak Area | Width L/2 (sec) | Percent Area |
|---------|-----------------|-----------|-----------------|--------------|
| 1       | 12.646          | 295118    | 23.4            | 1.27         |
| 2       | 14.046          | 22952140  | 29.7            | 98.73        |
|         |                 | 23247258  |                 | 100.00       |

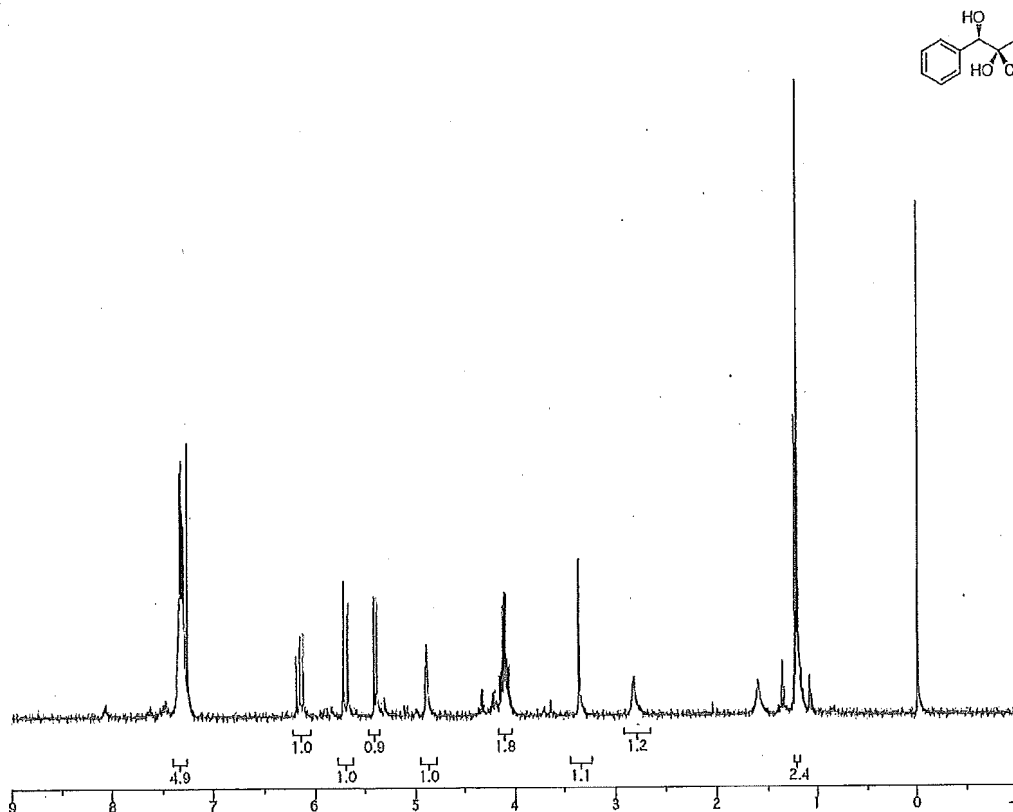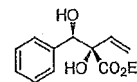

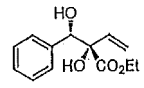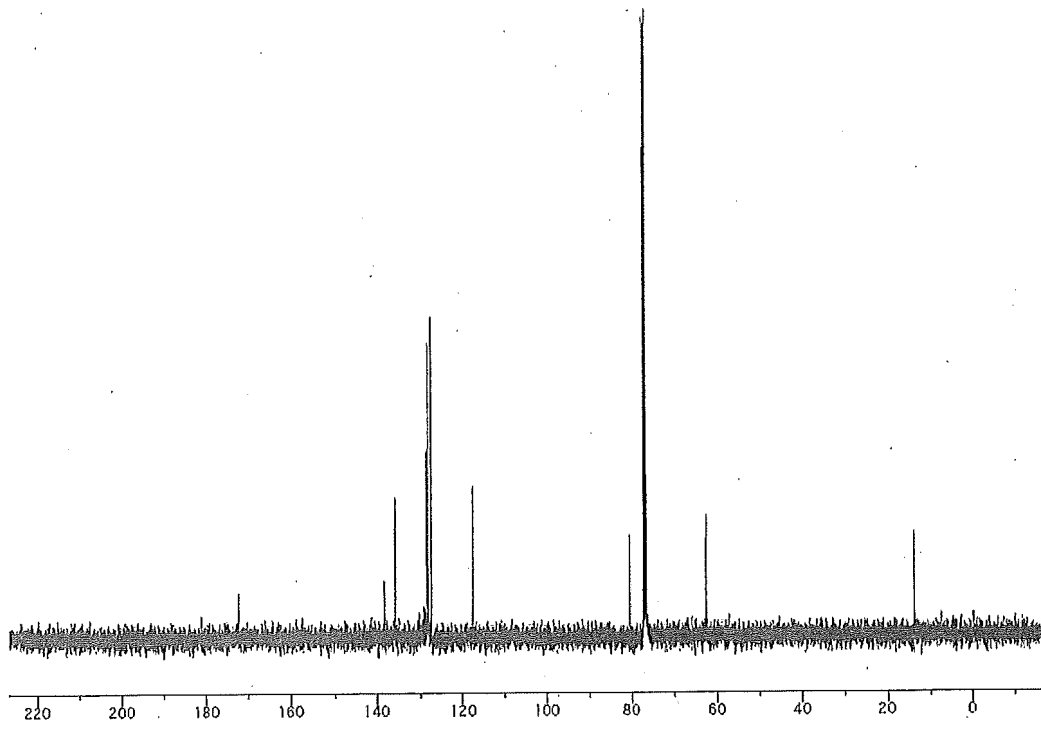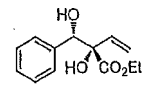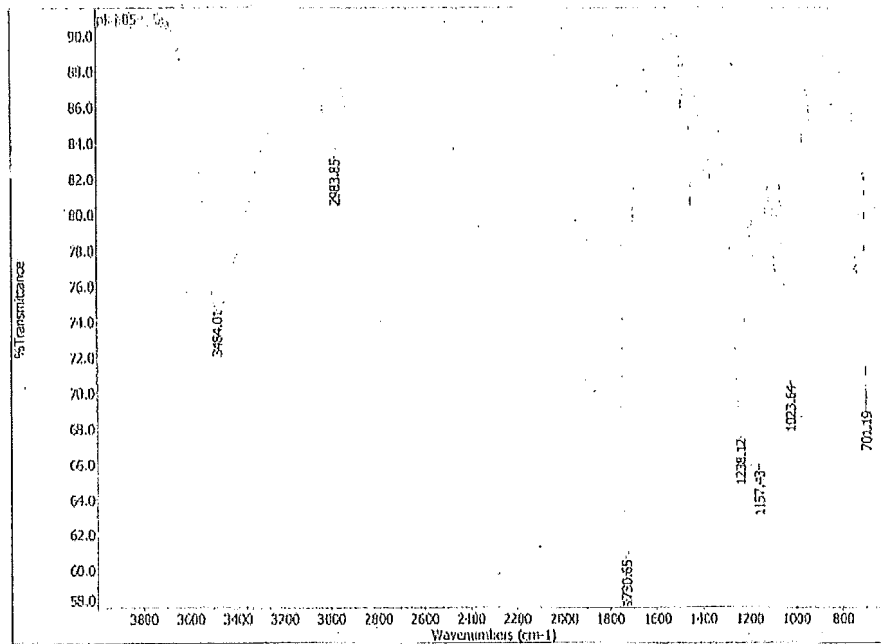

Stanford University Chemistry Department  
Tröst Lab HPLC Report

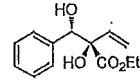

Data File: e:\star\data\phillip\06k-1-92-ad-90-10-01  
 Injection Date: 07/02/2009 05:07:11  
 Injection Method: e:\star\data\dauid\chiral right method  
 Run Time (min): 31.010  
 Instrument (lab): Chiral LC Right

Sample Prep Info  
Manual Injection

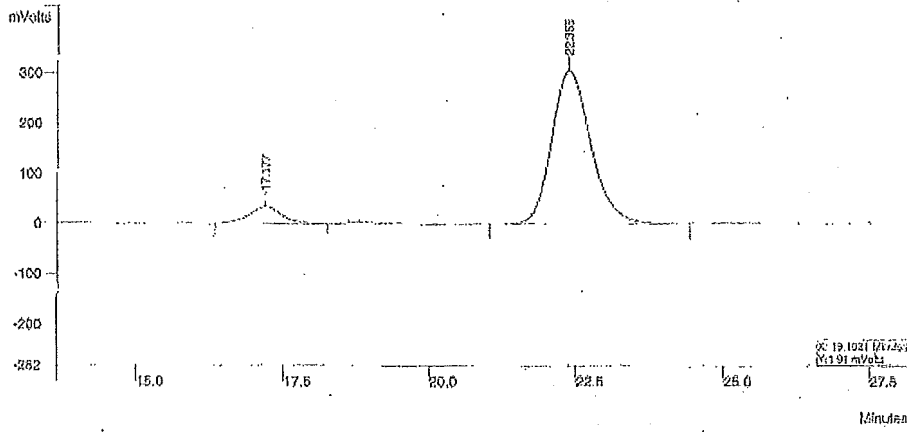

| Peak No | Ret. Time (min) | Peak Area | Width 1/2 (sec) | Percent Area |
|---------|-----------------|-----------|-----------------|--------------|
| 1       | 17.177          | 1343368   | 33.7            | 8.27         |
| 2       | 22.355          | 13792812  | 41.5            | 91.73        |
|         |                 | 15036180  |                 | 100.00       |

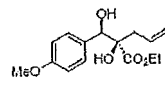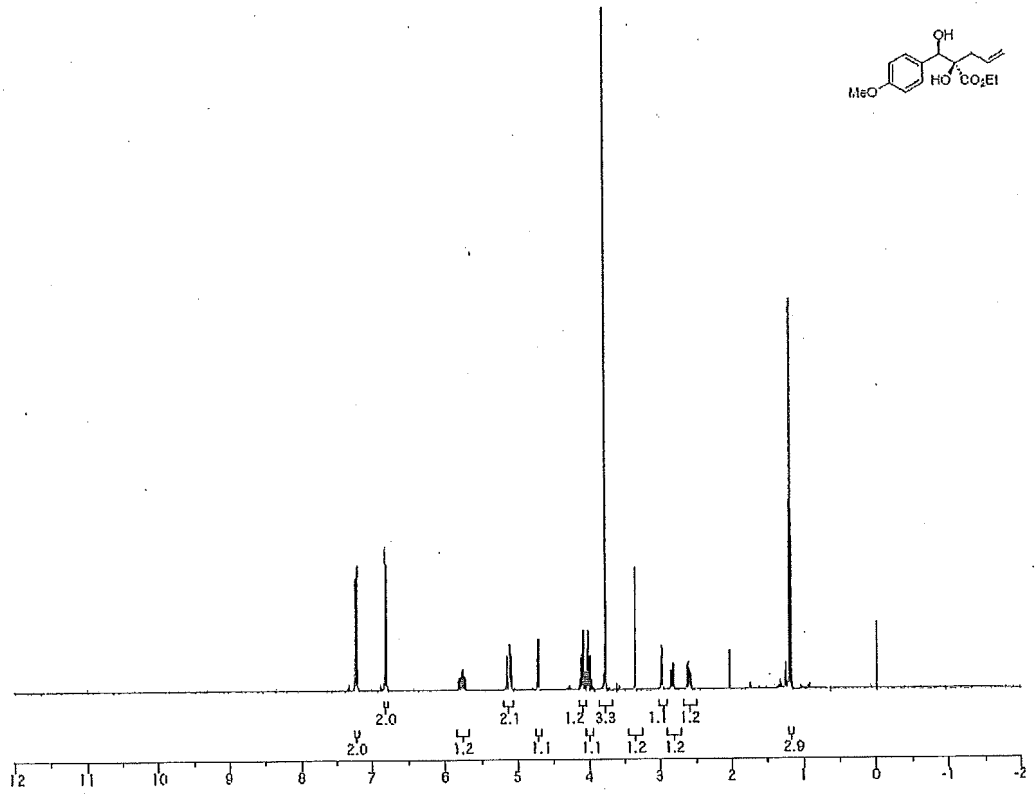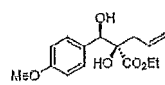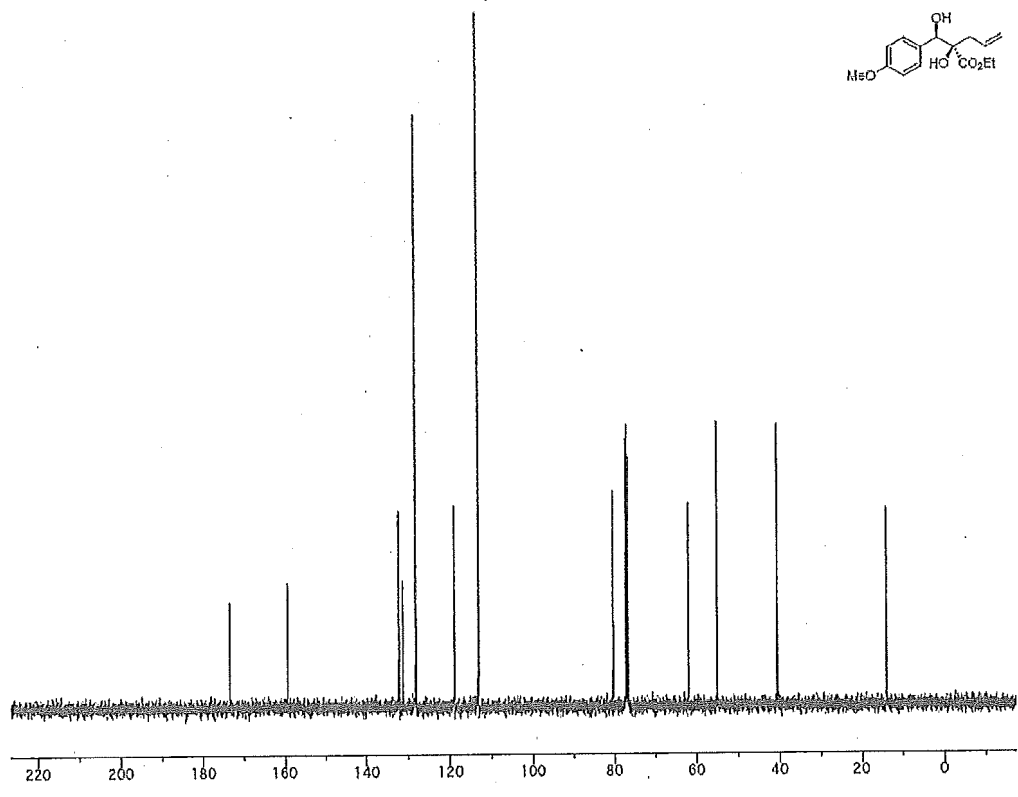

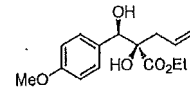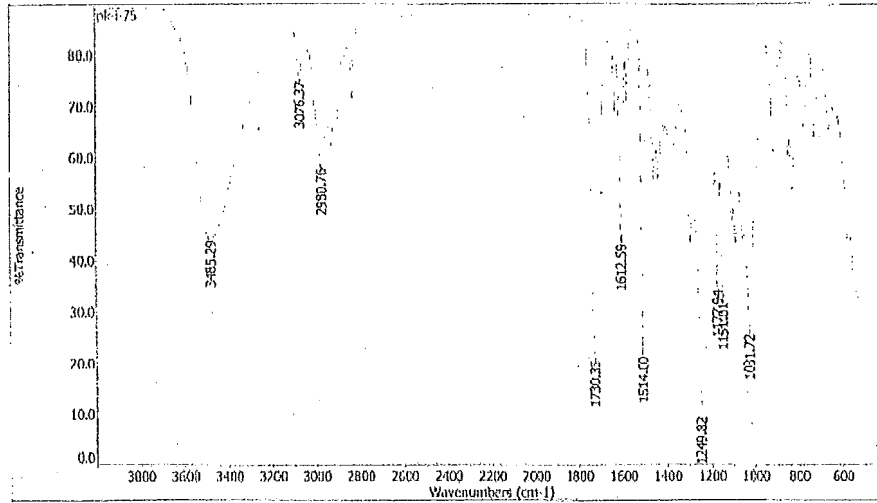

Stanford University Chemistry Department  
Trost Lab HPLC Report

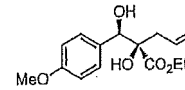

Data File: c:\stuf\data\philpp\ph-ii-4-le-90-10-1mb\mb-220.r  
 Injection Date: 07/09/2009 05:31:50  
 Injection Method: c:\stuf\chiral\le left\methods\chiral left  
 Run Time (min): 35.030  
 Instrument (inj): Chiral LC Left

Sample Prep Info  
Manual Injection

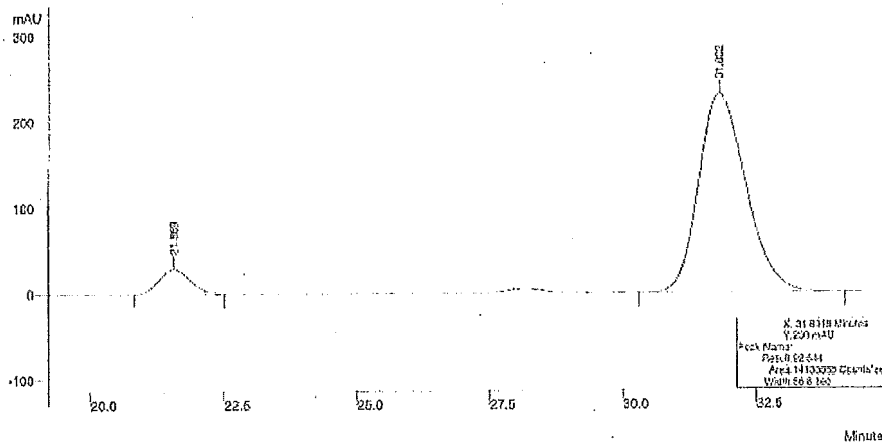

| Peak No | Ret. Time (min) | Width 1/2 (sec) | Peak Area | Percent Area |
|---------|-----------------|-----------------|-----------|--------------|
| 1       | 21.569          | 37.1            | 1138737   | 7.46         |
| 2       | 31.802          | 56.8            | 14133568  | 92.54        |
|         |                 |                 | 15272305  | 100.00       |



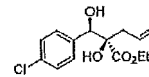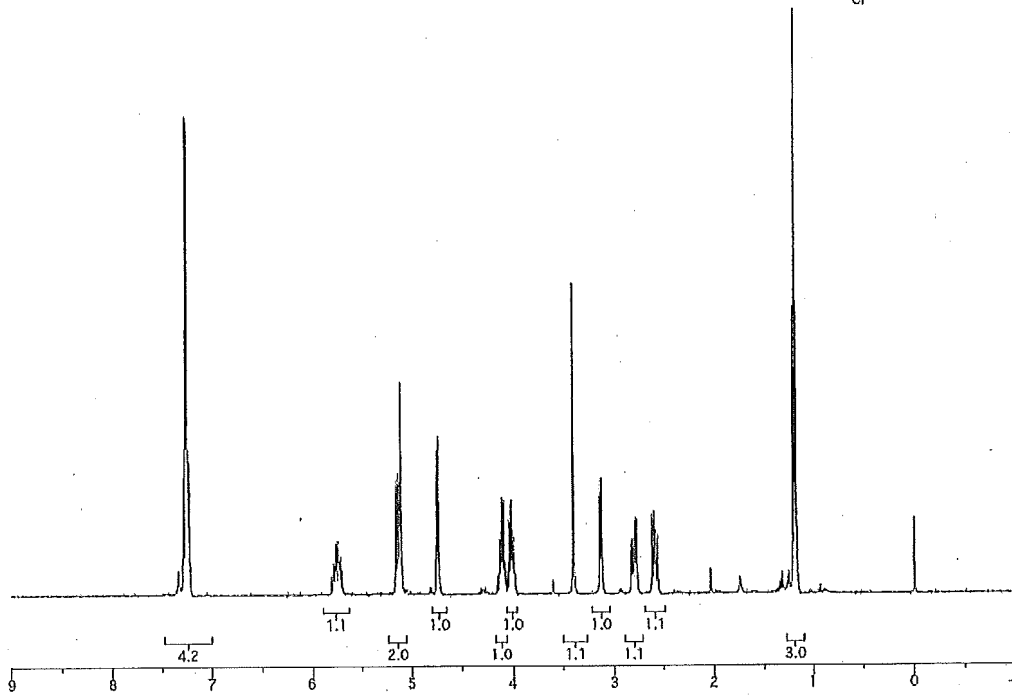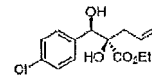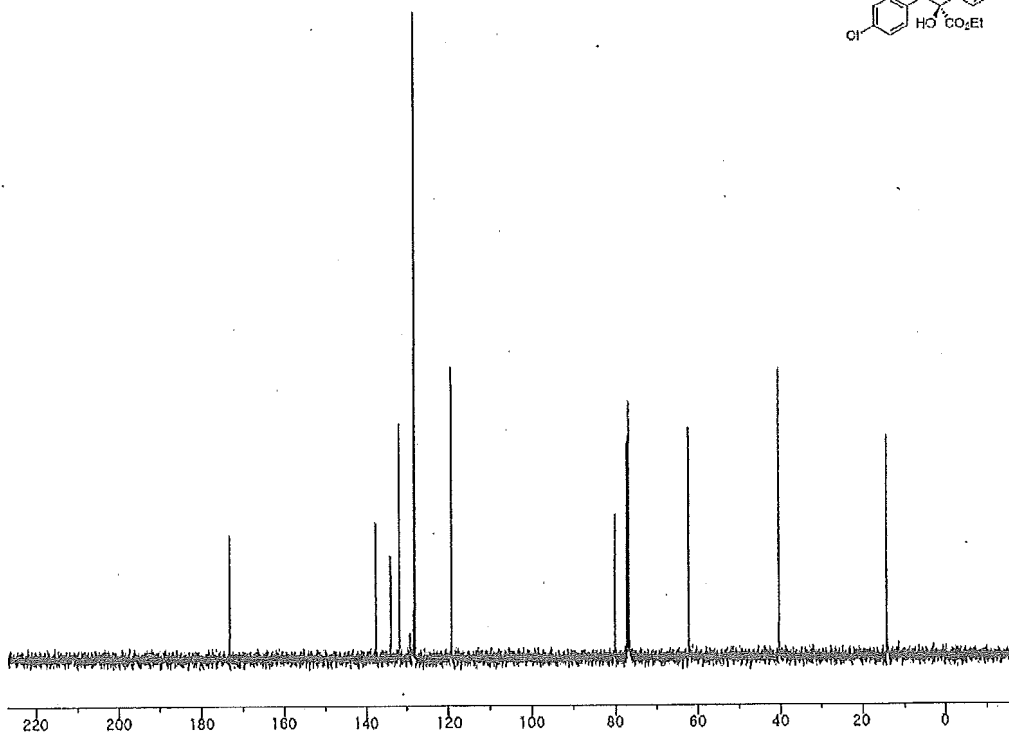

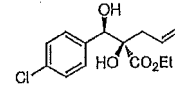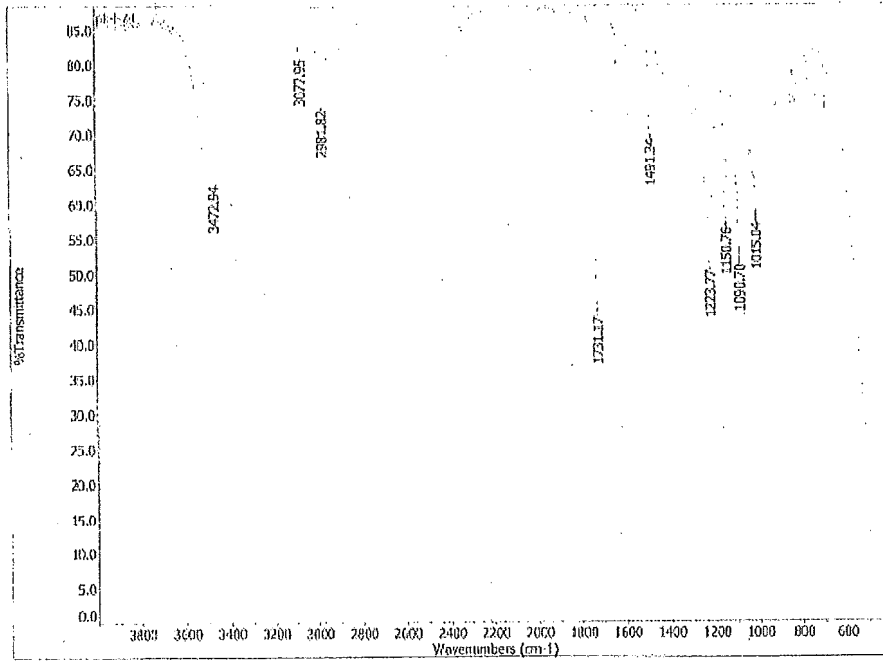

Stanford University Chemistry Department  
Trost Lab HPLC Report

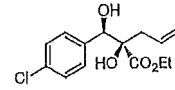

Data File: c:\star\data\phil\pprk-4-3-1c-95-5-1\mfmh-22000  
 Injection Date: 07/08/2009 10:22:02  
 Injection Method: c:\star\chiral\lc-left\methods\chiral-left  
 Run Time (min): 18.128  
 Instrument (Inj): Chiral LC Left

Sample Prep Info  
Manual Injection

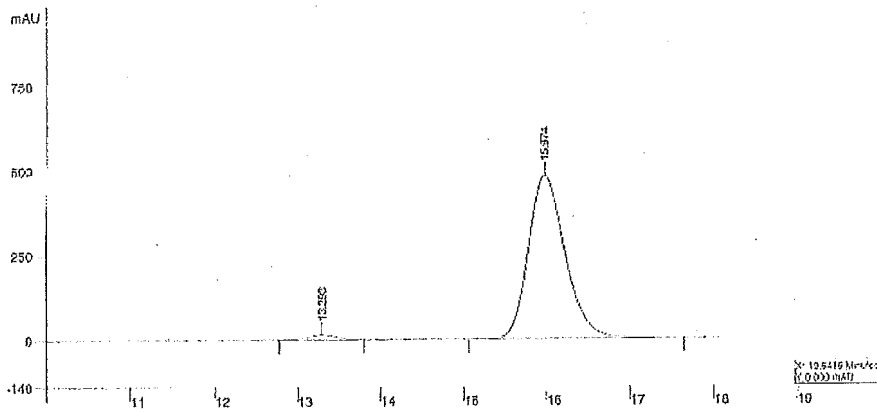

| Peak No | Ret. Time (min) | Width 1/2 (sec) | Peak Area | Percent Area |
|---------|-----------------|-----------------|-----------|--------------|
| 1       | 13.293          | 22.6            | 335242    | 2.20         |
| 2       | 15.974          | 28.2            | 14922004  | 97.80        |
|         |                 |                 | 15257346  | 100.00       |

Minutes

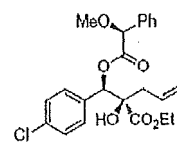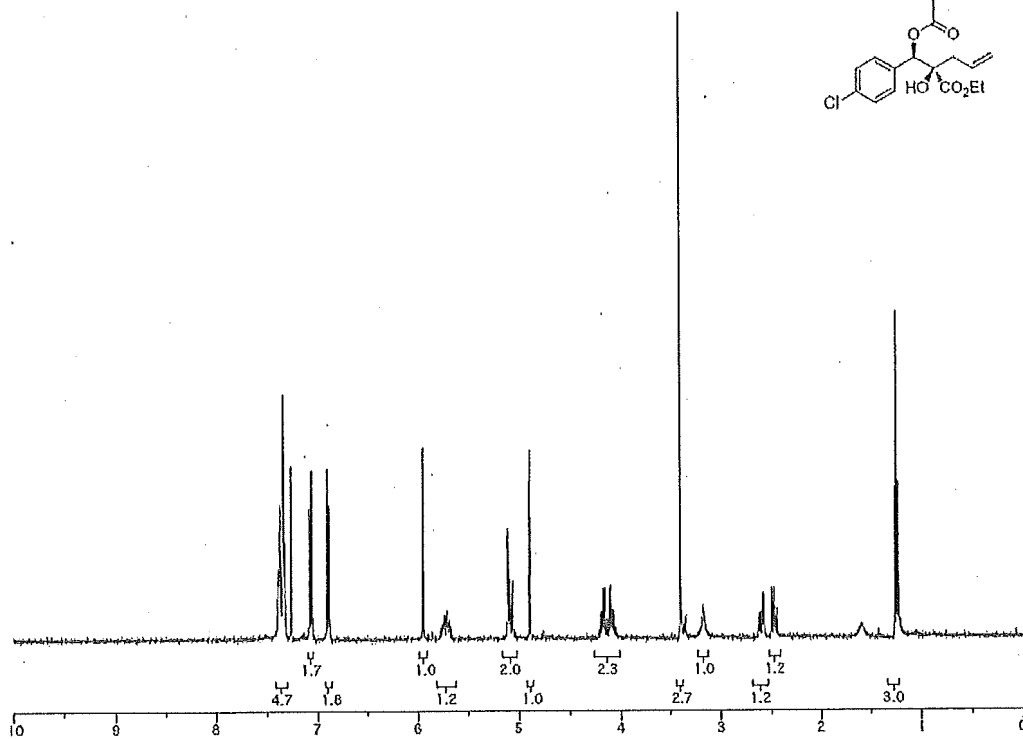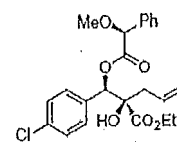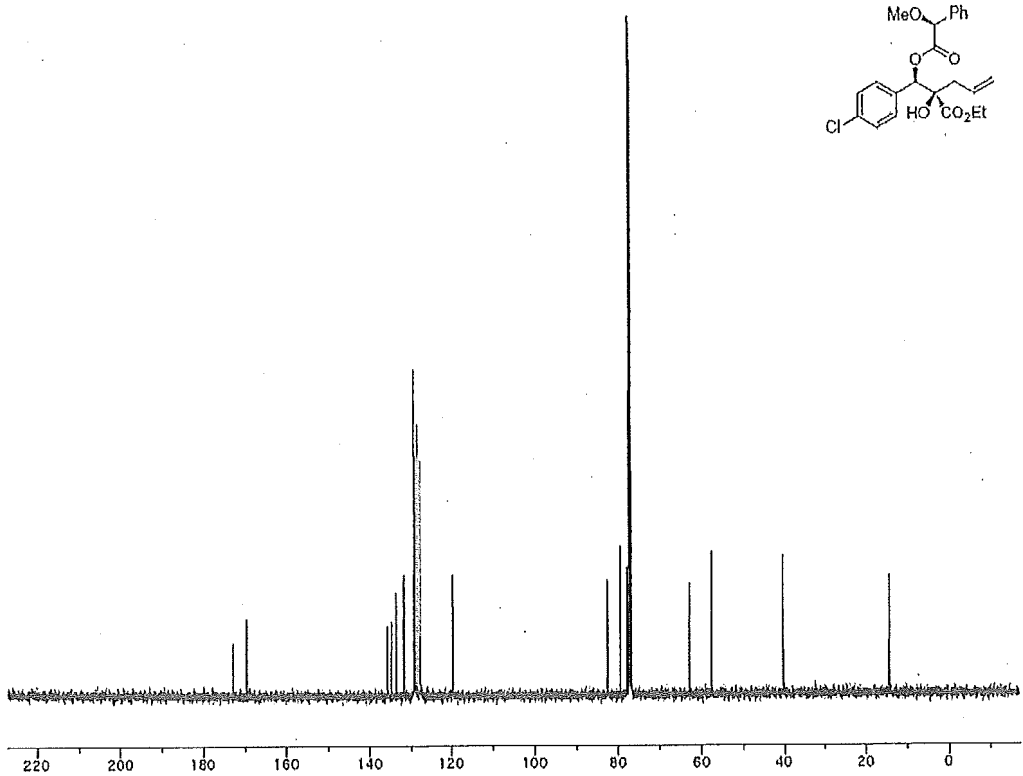

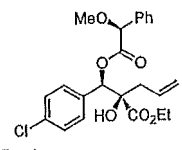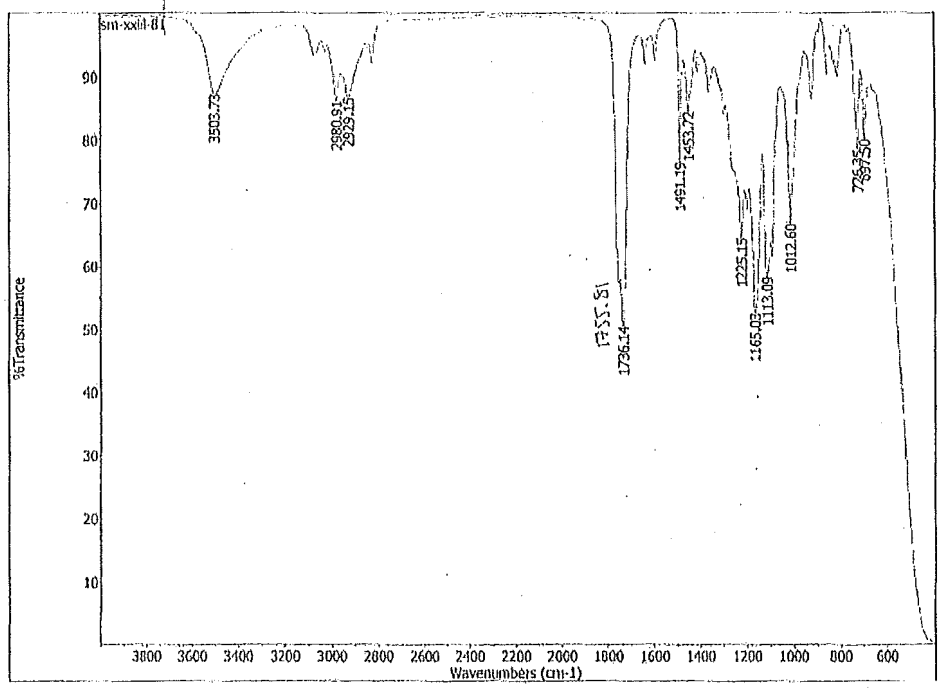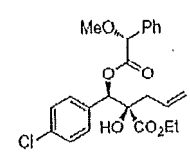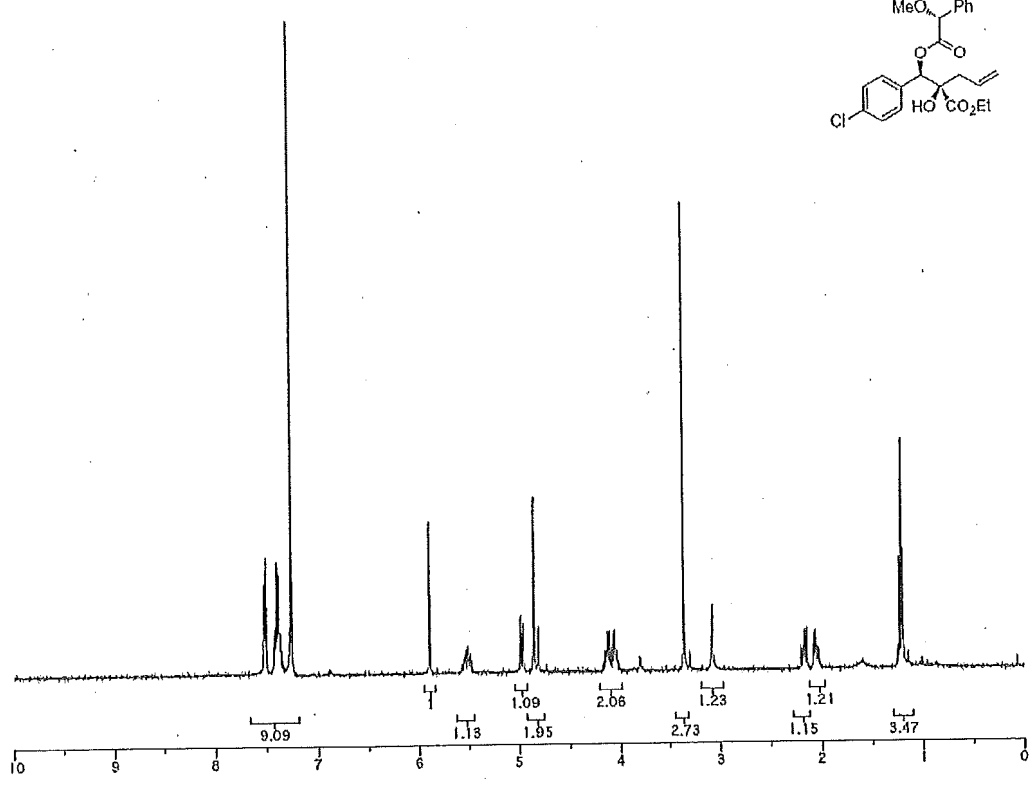

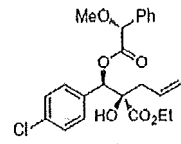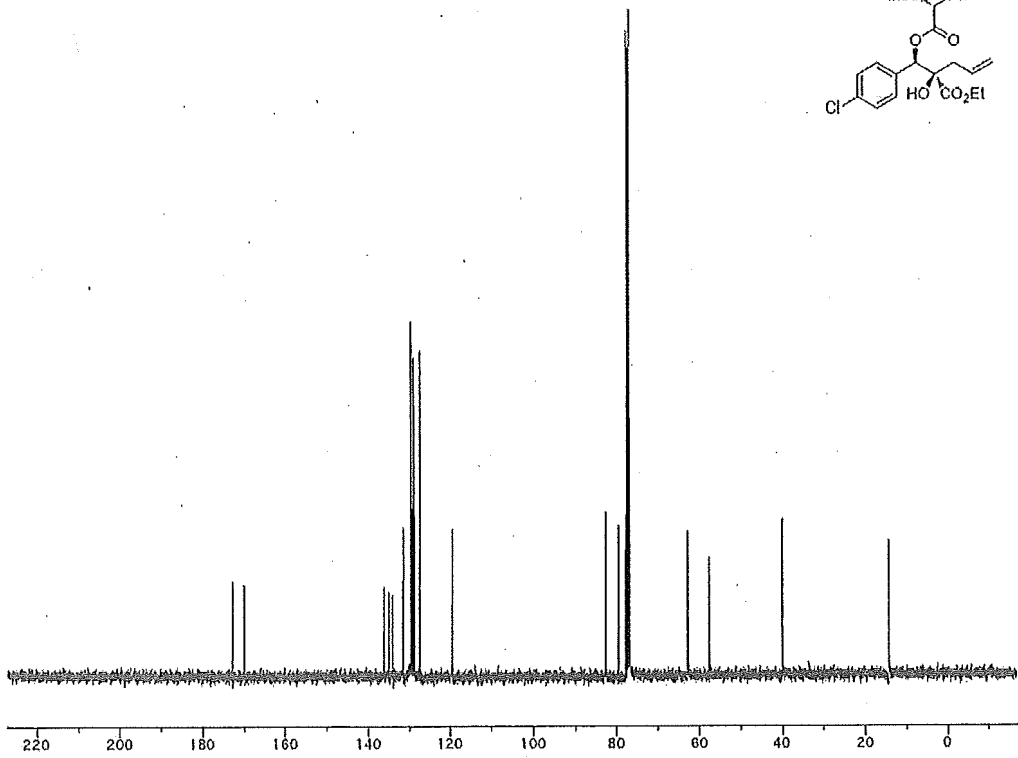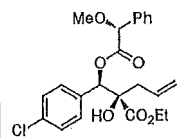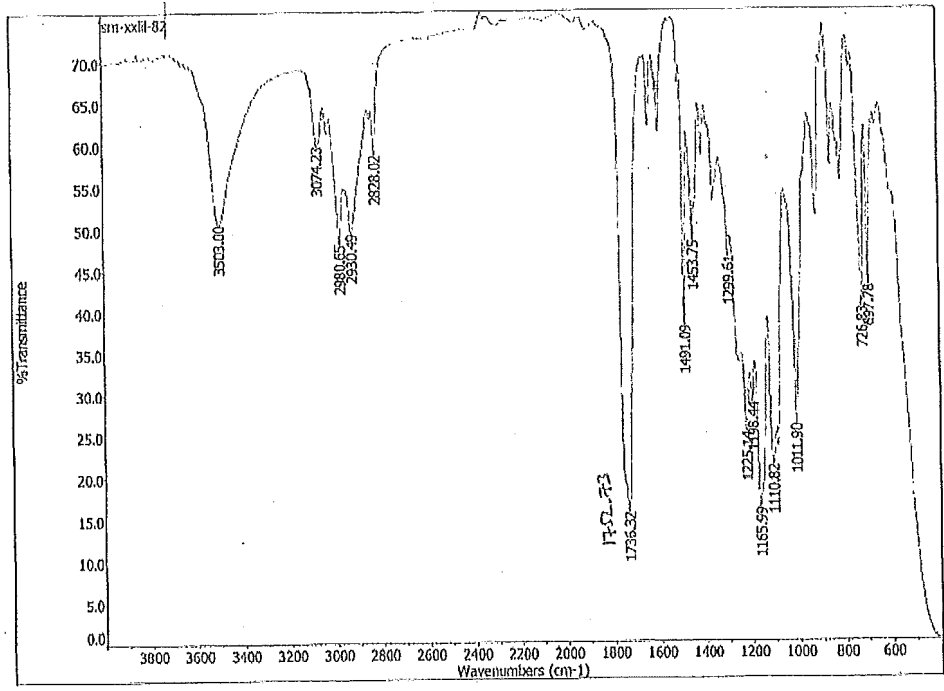

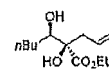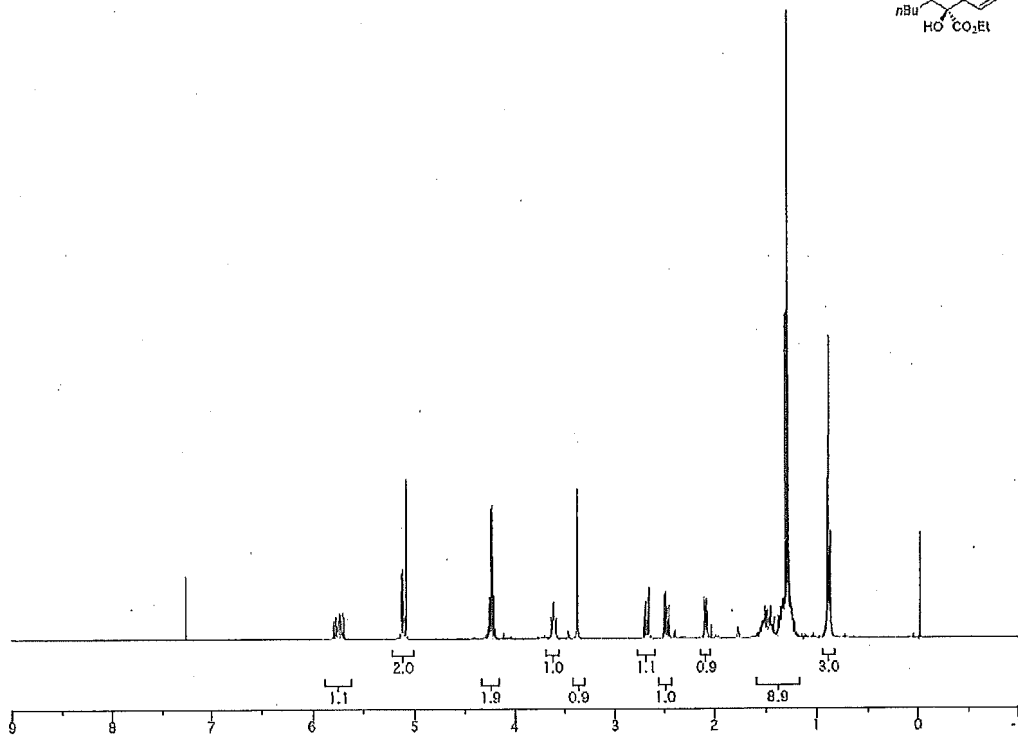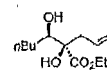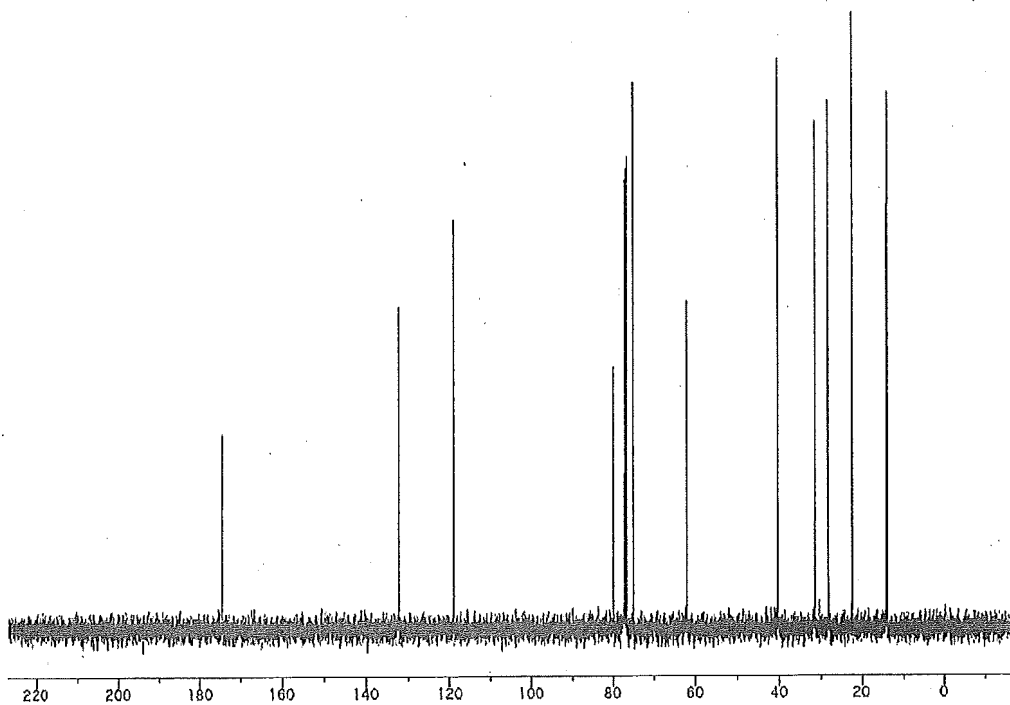

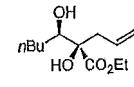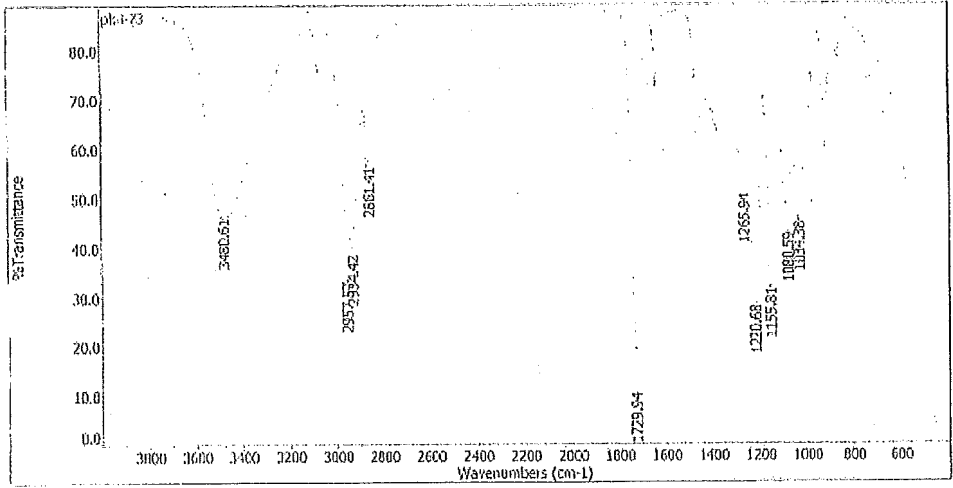

Stanford University Chemistry Department  
Trost Lab HPLC Report

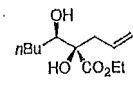

Data File: c:\star\data\hplc\ak-ii-6-ad-90-10-08  
 Injection Date: 07/08/2009 06:56:41  
 Injection Method: c:\star\data\hplc\chiral right method  
 Run Time (min): 15.221  
 Instrument (Inj): Chiral LC Right

Sample Prep Info  
Manual Injection

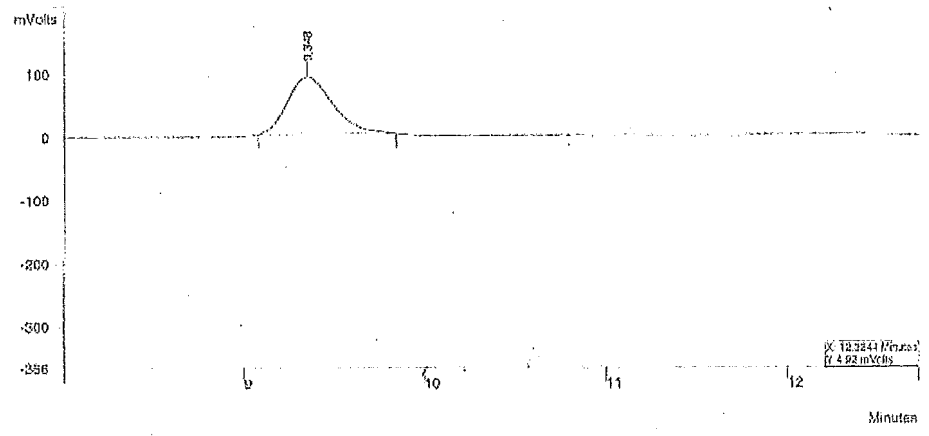

| Peak No | Ret. Time (min) | Peak Area | Width 1/2 (sec) | Percent Area |
|---------|-----------------|-----------|-----------------|--------------|
| 1       | 9.348           | 1580392   | 16.2            | 100.00       |

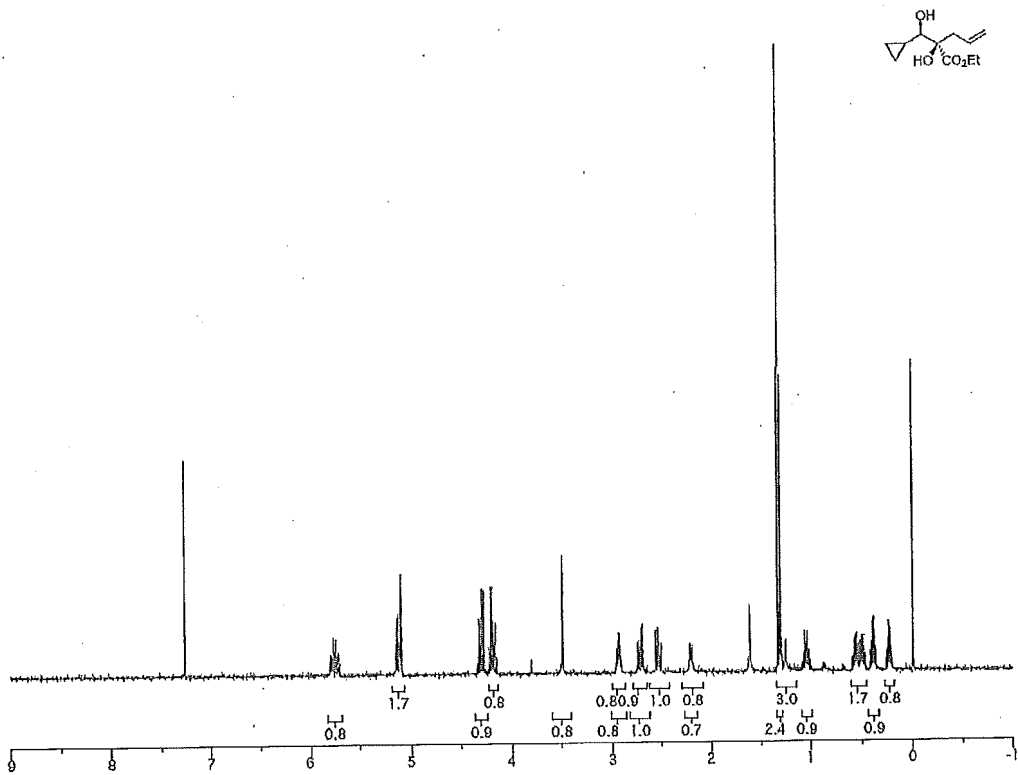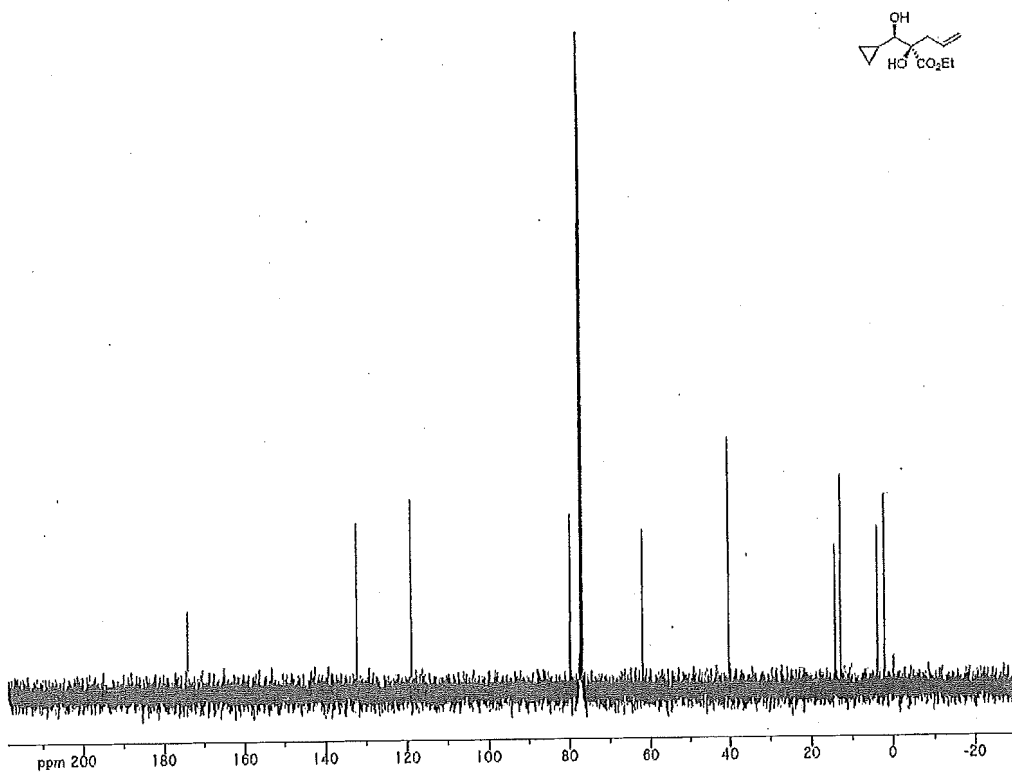



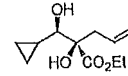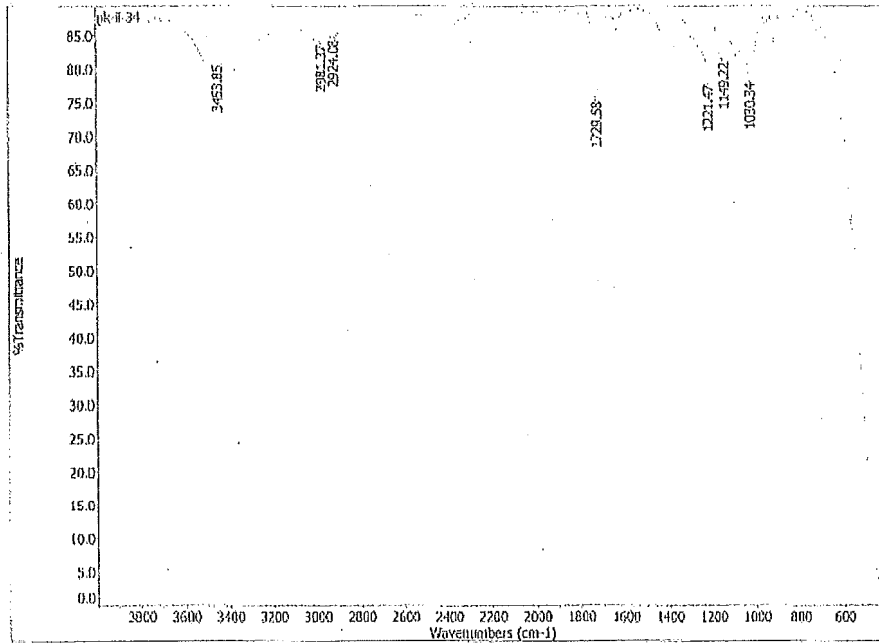

Stanford University Chemistry Department  
Trost Lab HPLC Report

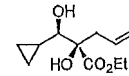

File: c:\star\data\phl\pp\pk-ii-47-in-98-2-1mlmln-220.r  
Injection Date: 08/06/2009 01:47:04  
Injection Method: c:\star\chiral\left\method\chiral left  
Run Time (min): 35.515  
Instrument (inj): Chiral LC Left

Sample Prep Info  
 Manual Injection

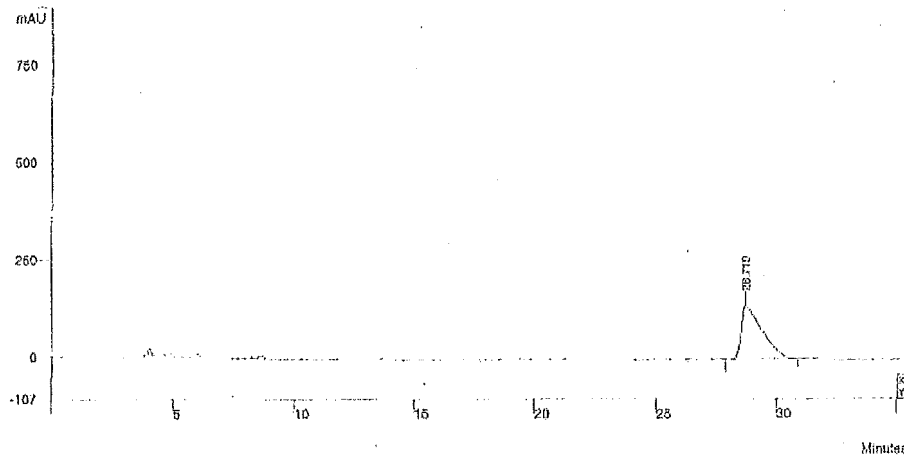

| Peak No | Ret. Time (min) | Width 1/2 (sec) | Peak Area | Percent Area |
|---------|-----------------|-----------------|-----------|--------------|
| 1       | 38.719          | 55.5            | 8194437   | 100.00       |
|         |                 |                 | 8194437   | 100.00       |

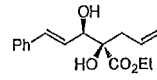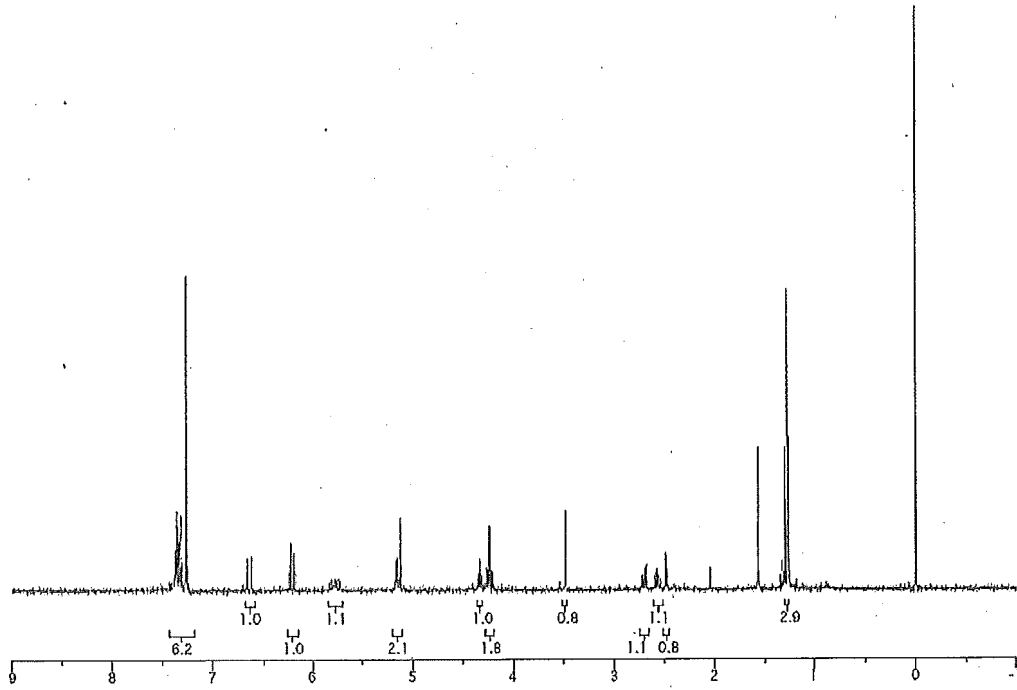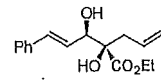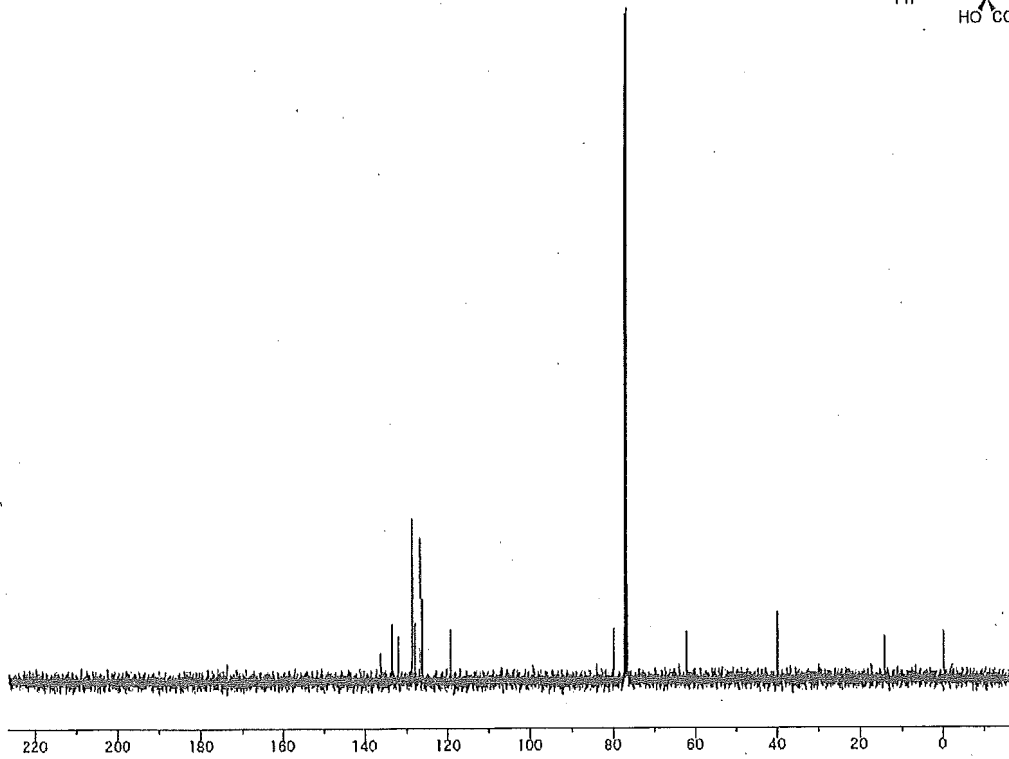

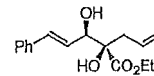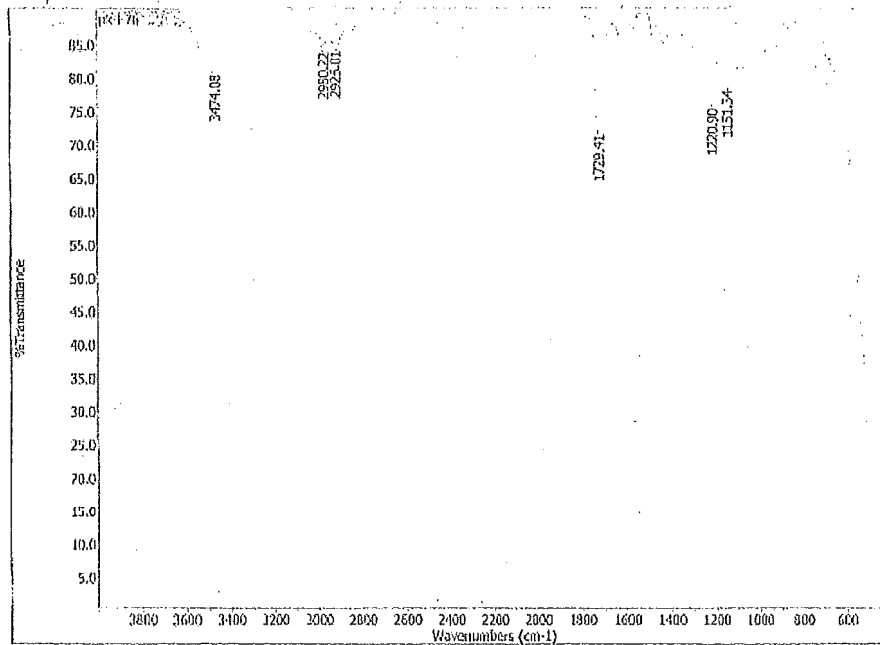

Stanford University Chemistry Department  
Trost Lab HPLC Report

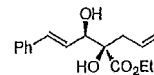

File: c:\star\data\phl\pppk-ii-5-ic-98-5-1ml\dn-220.ru      Sample Prep Info  
 Injection Date: 07/09/2009 04:54:01      Manual Injection  
 Injection Method: c:\star\chiral\ic-left\method\chiral-left  
 Run Time (min): 39.920  
 Instrument (inj): Chiral LC Left

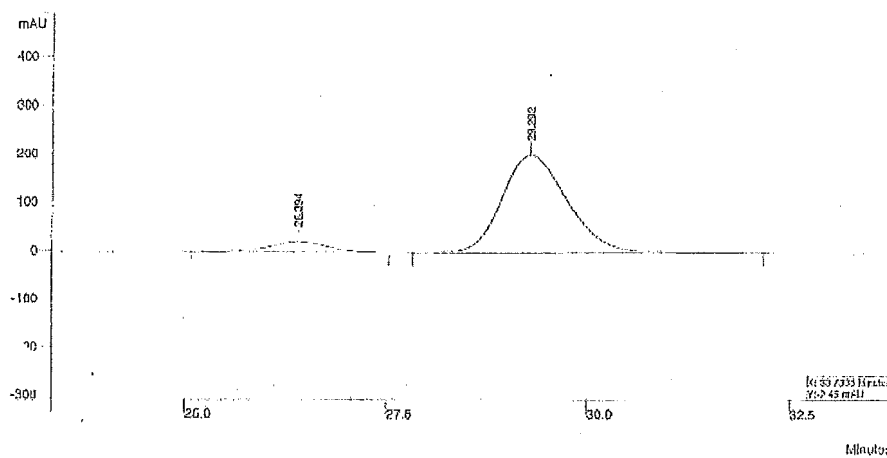

| Peak No | Ret. Time (min) | Width 1/2 (sec) | Peak Area | Percent Area |
|---------|-----------------|-----------------|-----------|--------------|
| 1       | 26.394          | 47.7            | 1135417   | 9.03         |
| 2       | 29.292          | 52.1            | 11439503  | 90.97        |
|         |                 |                 | 12574920  | 100.00       |

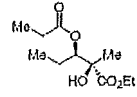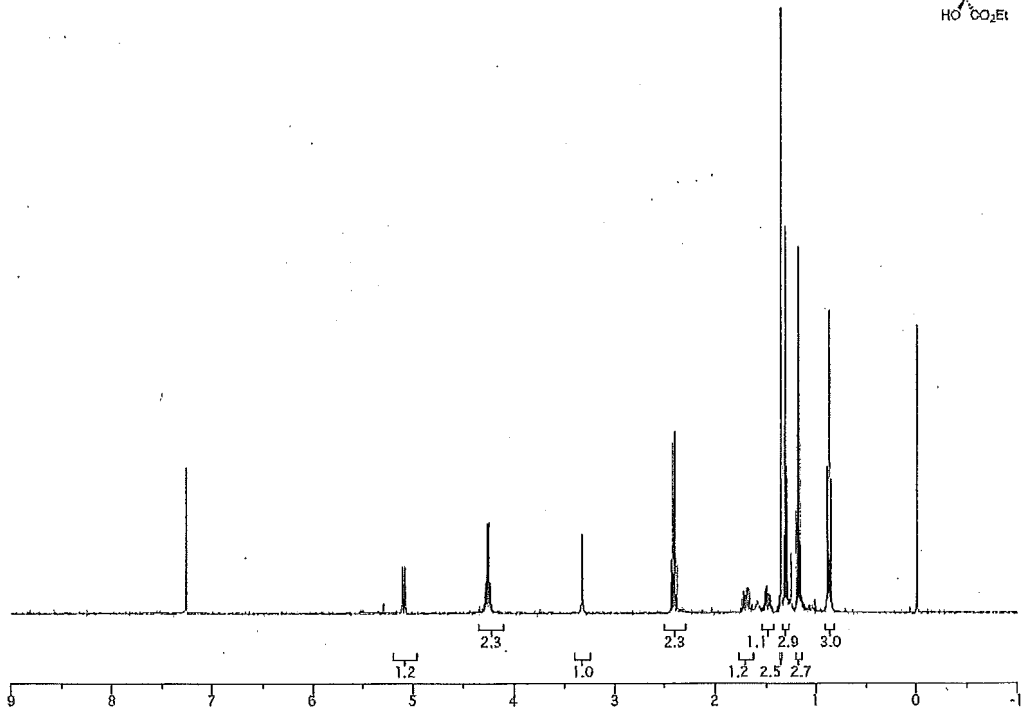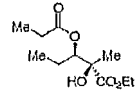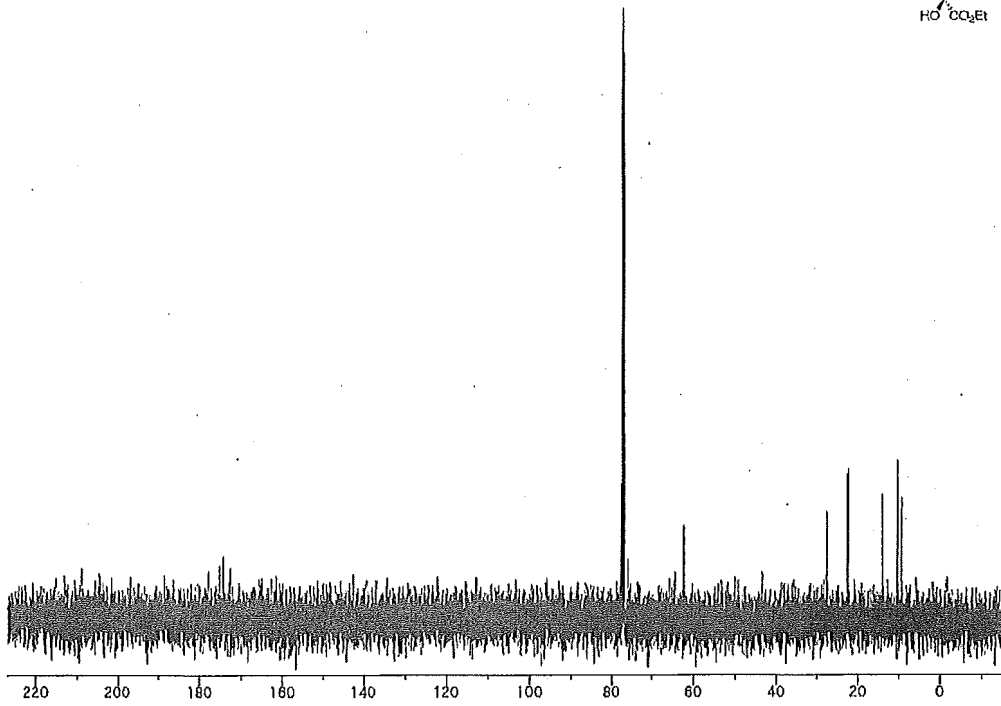

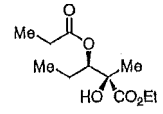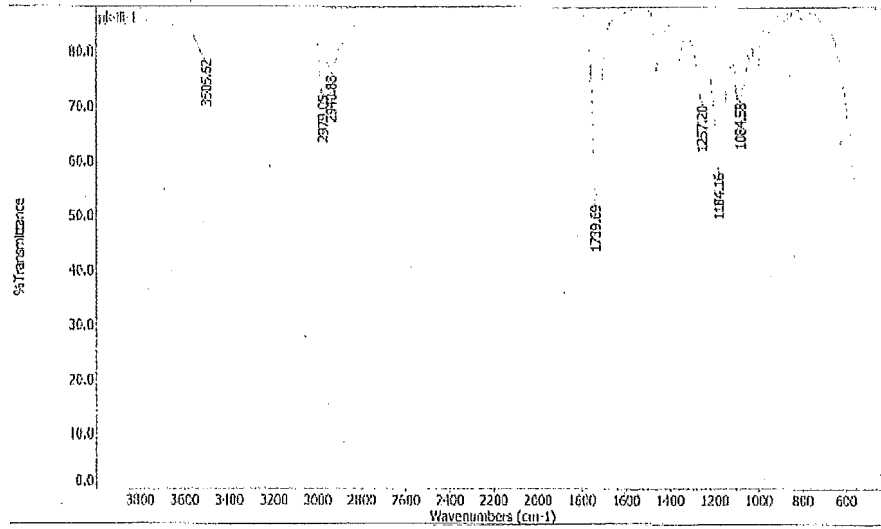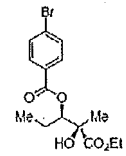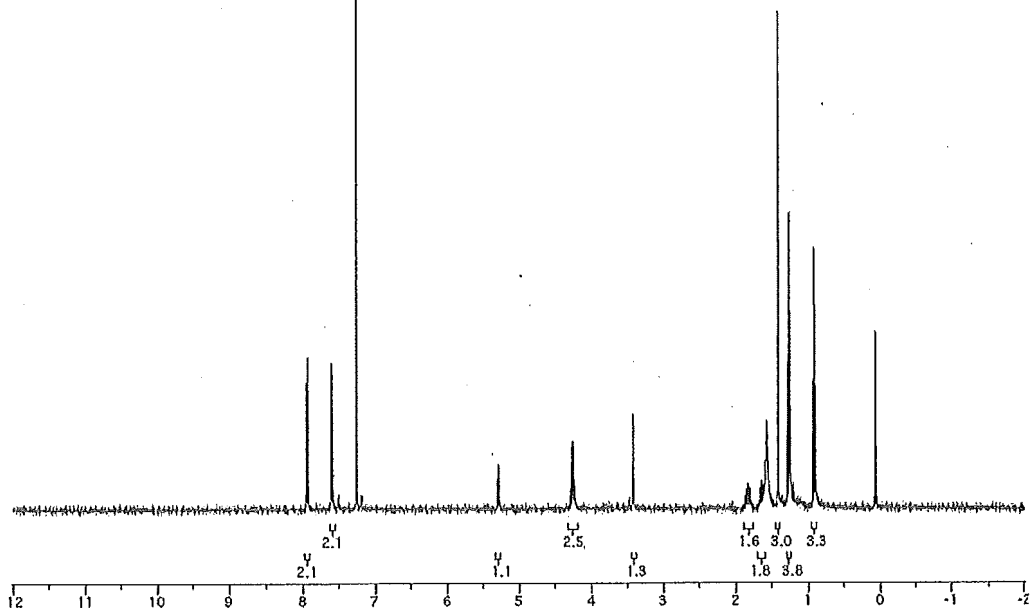

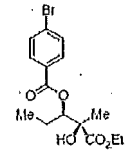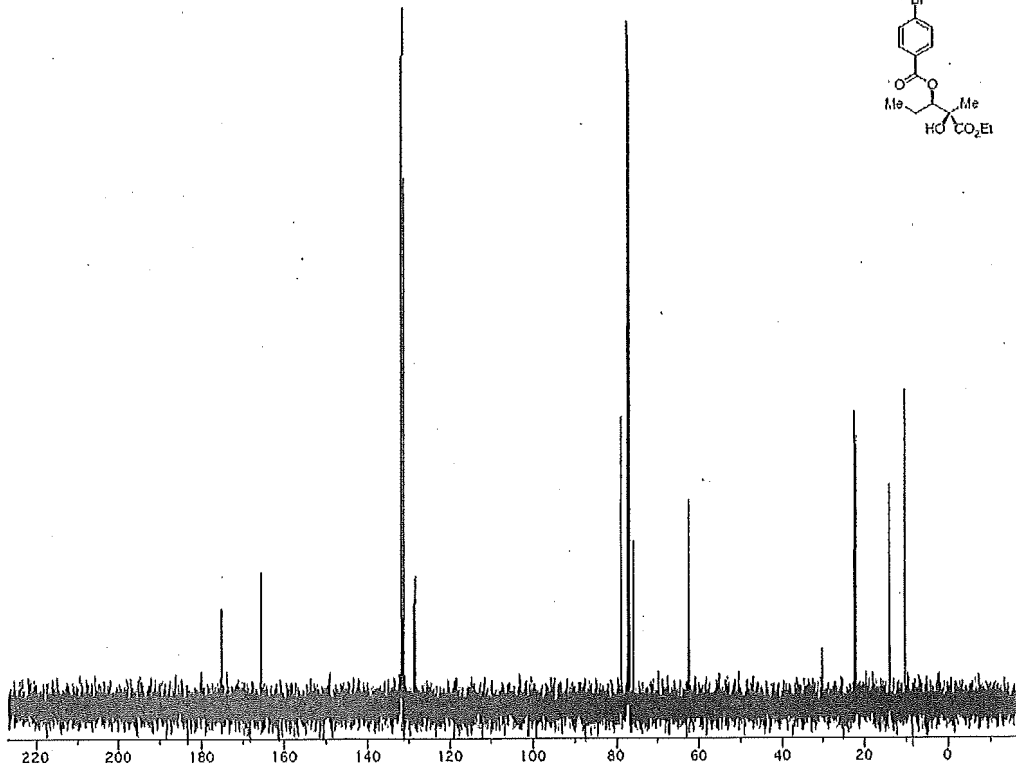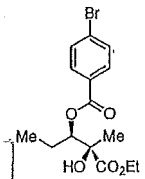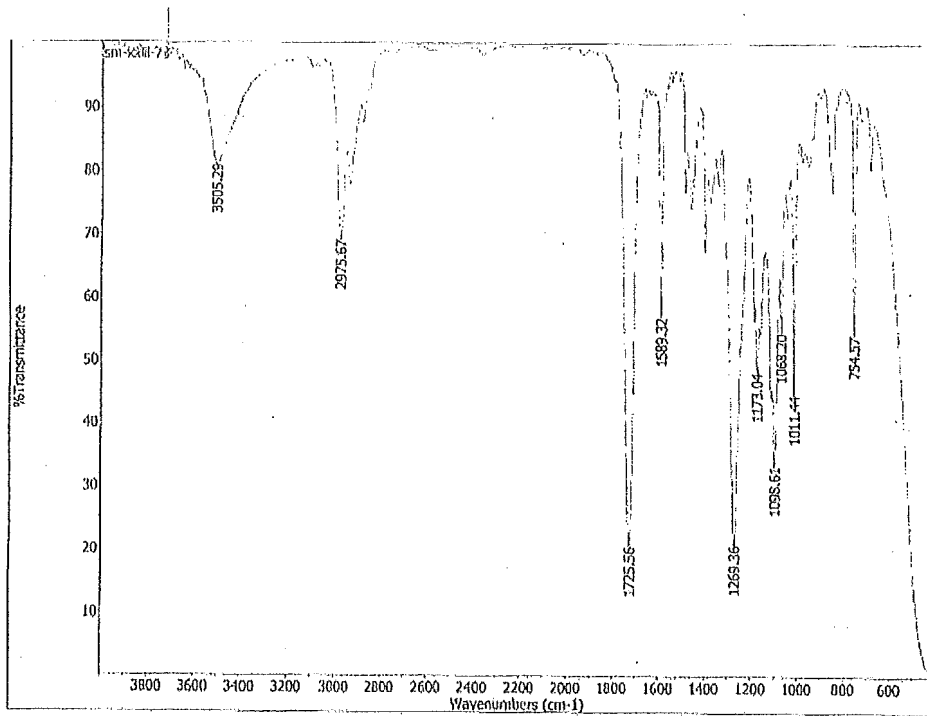

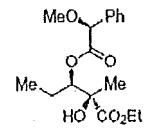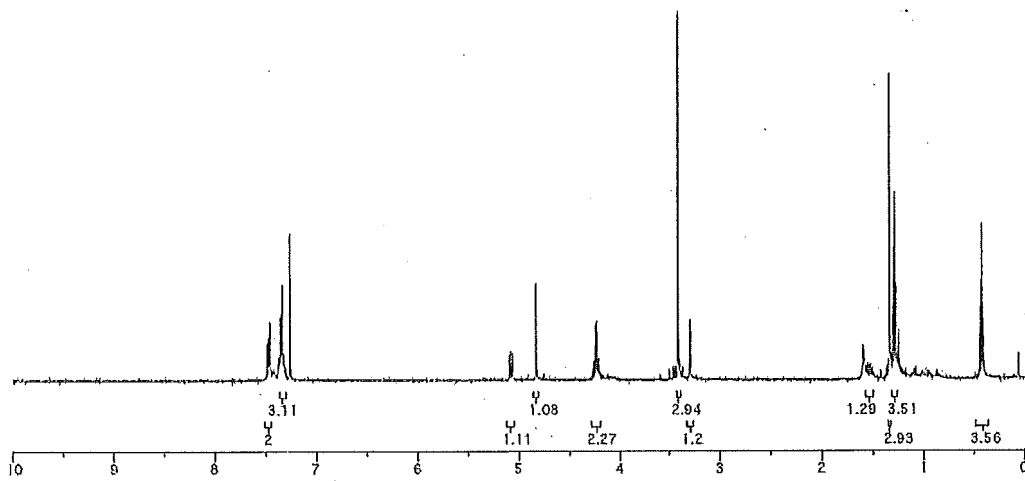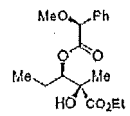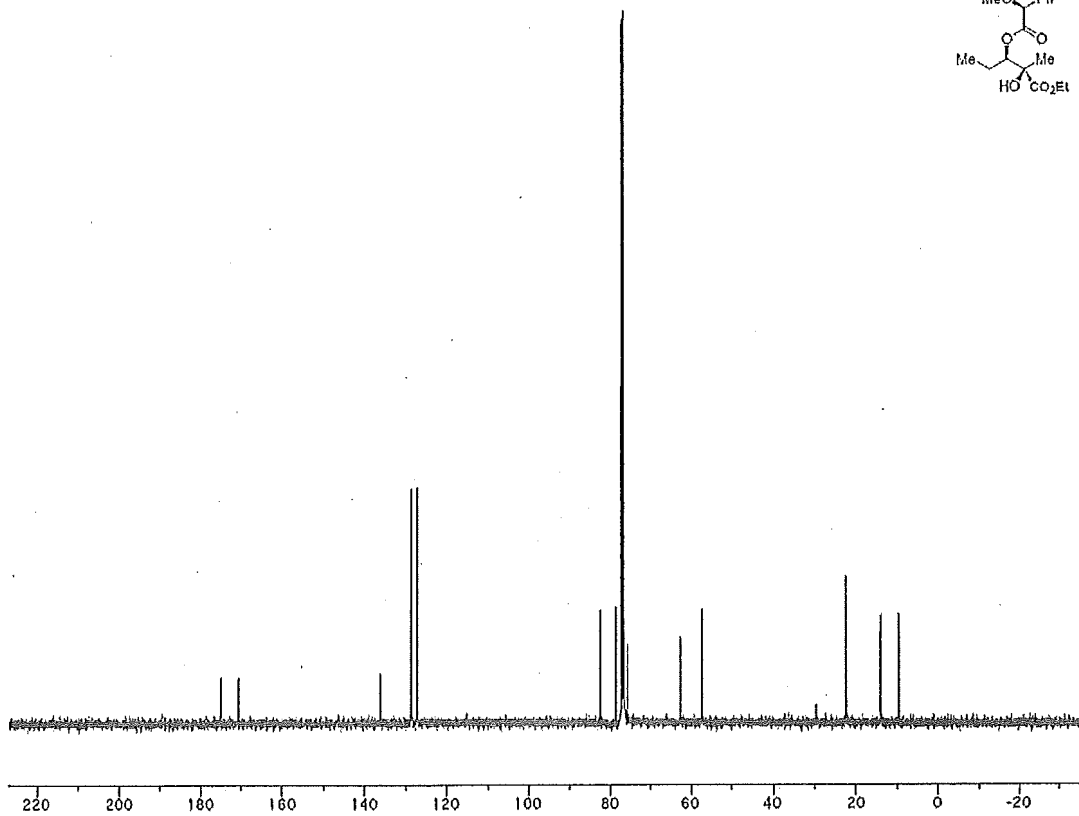

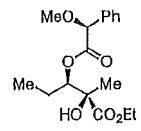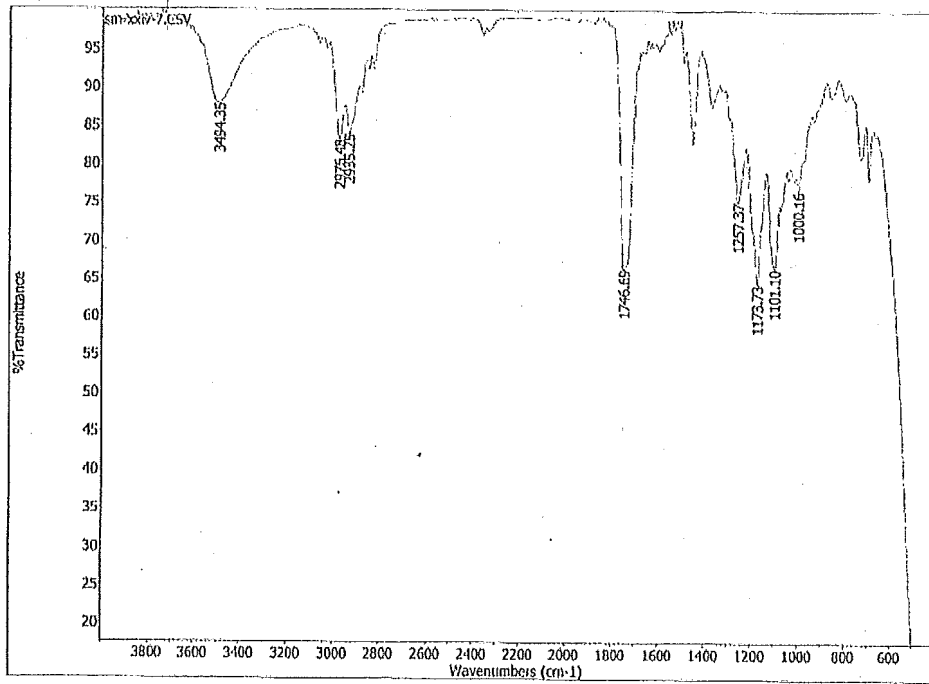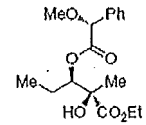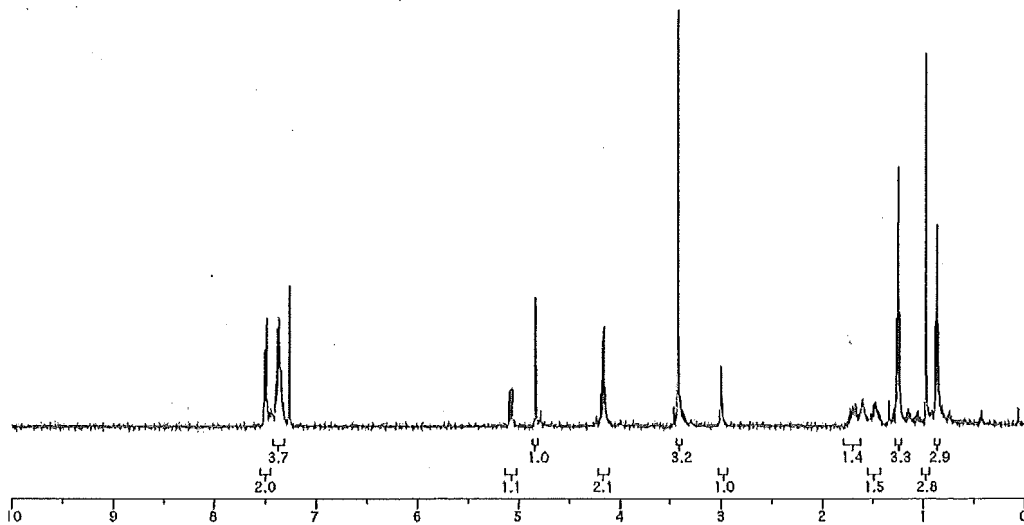



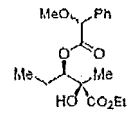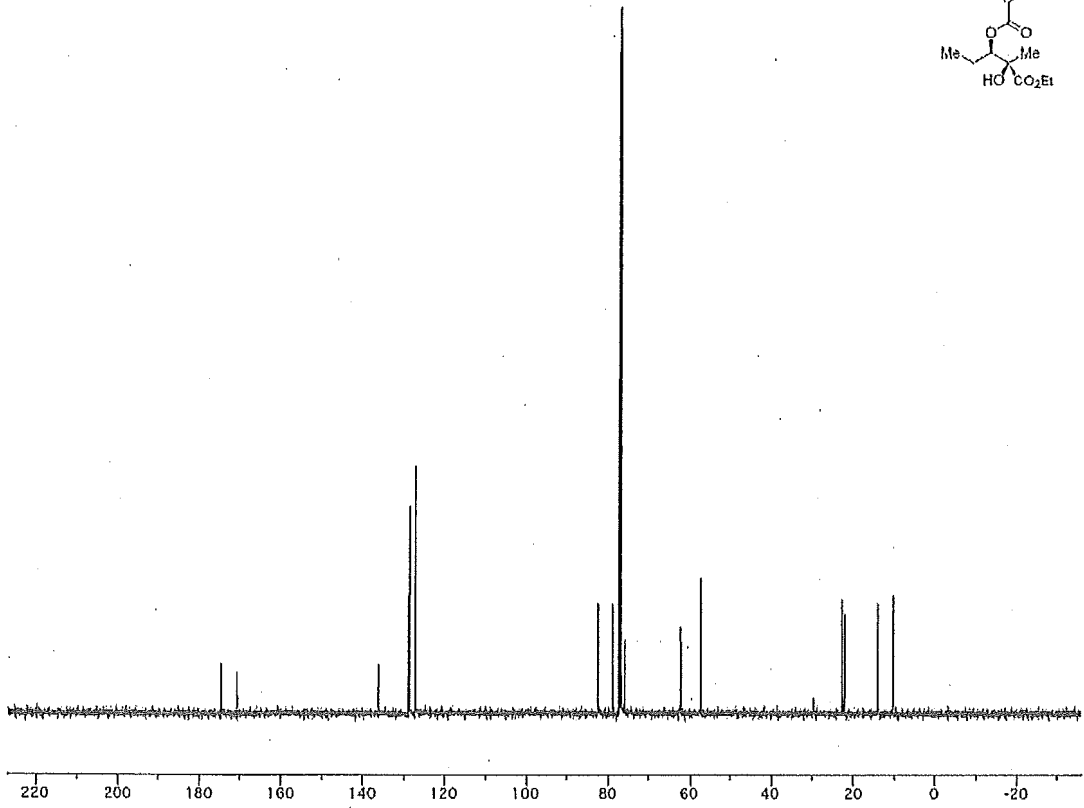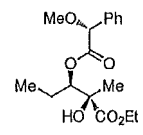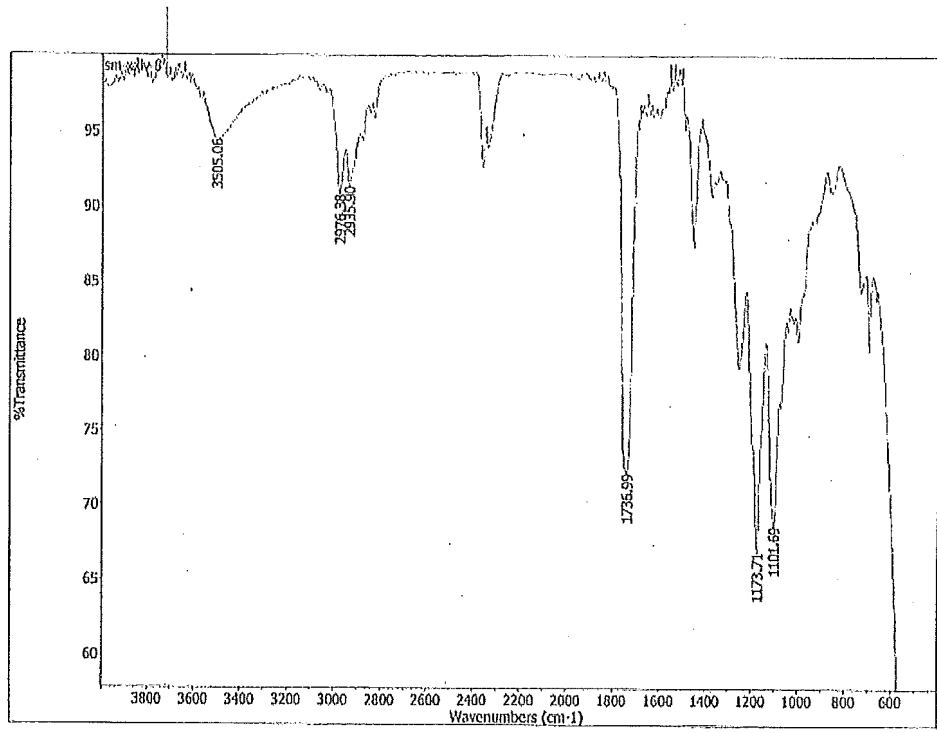

Supplement: NIHMS339915-supplement-2_si_002.pdf [file NIHMS339915-supplement-2_si_002.pdf]
