# Supplementary material
Source: PubMed Central journal article supplement (PMC3271135)

Sample: SU032

X-ray Structure Report

for

Sushant Malhotra

Dept. of Chemistry, Stanford University

+1 317 490 3615

sushantm@stanford.edu

Prof. B. M. Trost.

Friday, June 04, 2010

## DISCUSSION

The compound crystallizes as colorless, blade-like crystals grown from a heptane solution. There are two molecules of the compound in the unit cell of the primitive, acentric, monoclinic space group  $P2_1$ . The absolute configuration was determined both by the known handedness of the molecule and by comparison of intensities of Friedel pairs of reflections (Flack parameter = 0.000(7), a value of zero indicates the correct absolute configuration, a value of one the inverted absolute stereochemistry).

The structure of the molecule and stereochemistry is as expected. The vinyl group was found to be disordered by an approximately  $180^\circ$  rotation about the C-C single bond. The occupancies of the pairs of disordered carbons were refined and summed to unity giving a nearly 0.6:0.4 occupancy ratio. The thermal displacement parameters on the major and minor components were refined isotropically, while the atoms in the core of the molecule were refined with anisotropic thermal motion parameters. Inclusion of this disorder model improved the overall model. The disorder results in a slight shortening of the C-C bond distance to the minor component (C4-C12A = 1.467(11) Å compared with C4-C12 = 1.565(8) Å). However, it does not alter the characterization of the species.

The remaining bond distances and angles are otherwise as would be expected.

## CRYSTAL SUMMARY

Crystal data for  $C_{24}H_{25}BrO_6$ ;  $M_r = 489.35$ ; monoclinic; space group  $P2_1$ ;  $a = 6.8101(6)$  Å;  $b = 13.0126(10)$  Å;  $c = 12.8280(10)$  Å;  $\alpha = 90^\circ$ ;  $\beta = 93.991(2)^\circ$ ;  $\gamma = 90^\circ$ ;  $V = 1134.02(16)$  Å<sup>3</sup>;  $Z = 2$ ;  $T = 100(2)$  K;  $\lambda(\text{Mo-K}\alpha) = 0.71073$  Å;  $\mu(\text{Mo-K}\alpha) = 1.849$  mm<sup>-1</sup>;  $d_{\text{calc}} = 1.433$  g.cm<sup>-3</sup>; 12969 reflections collected; 4446 unique ( $R_{\text{int}} = 0.0493$ ); giving  $R_1 = 0.0360$ ,  $wR_2 = 0.0578$  for 3643 data with  $[I > 2\sigma(I)]$  and  $R_1 = 0.0514$ ,  $wR_2 = 0.0627$  for all 4446 data. Residual electron density ( $e^- \cdot \text{Å}^{-3}$ ) max/min: 0.295/-0.270.

An arbitrary sphere of data were collected on a colorless blade-like crystal, having approximate dimensions of  $0.29 \times 0.16 \times 0.13$  mm, on a Bruker Kappa X8-APEX-II diffractometer using a combination of  $\omega$ - and  $\phi$ -scans of  $0.5^\circ$ . Data were corrected for absorption and polarization effects and analyzed for space group determination. The structure was solved by direct methods and expanded routinely. The model was refined by full-matrix least-squares analysis of  $F^2$  against all reflections. All non-hydrogen atoms were refined with anisotropic thermal displacement parameters. Unless otherwise noted, hydrogen atoms were included in calculated positions. Thermal parameters for the hydrogens were tied to the isotropic thermal parameter of the atom to which they are bonded ( $1.5 \times$  for methyl,  $1.2 \times$  for all others).

Table 1. Crystal data and structure refinement for su032.

|                                        |                                                                                                                                   |
|----------------------------------------|-----------------------------------------------------------------------------------------------------------------------------------|
| Identification code                    | su032                                                                                                                             |
| Empirical formula                      | $C_{24}H_{25}BrO_6$                                                                                                               |
| Formula weight                         | 489.35                                                                                                                            |
| Temperature                            | 100(2) K                                                                                                                          |
| Wavelength                             | 0.71073 Å                                                                                                                         |
| Crystal system                         | monoclinic                                                                                                                        |
| Space group                            | $P2_1$                                                                                                                            |
| Unit cell dimensions                   | $a = 6.8101(6)$ Å $\alpha = 90^\circ$<br>$b = 13.0126(10)$ Å $\beta = 93.991(2)^\circ$<br>$c = 12.8280(10)$ Å $\gamma = 90^\circ$ |
| Volume                                 | 1134.02(16) Å <sup>3</sup>                                                                                                        |
| Z                                      | 2                                                                                                                                 |
| Density (calculated)                   | 1.433 g.cm <sup>-3</sup>                                                                                                          |
| Absorption coefficient ( $\mu$ )       | 1.849 mm <sup>-1</sup>                                                                                                            |
| F(000)                                 | 504                                                                                                                               |
| Crystal size                           | 0.29 × 0.16 × 0.13 mm <sup>3</sup>                                                                                                |
| $\theta$ range for data collection     | 1.59 to 26.44°                                                                                                                    |
| Index ranges                           | -8 ≤ h ≤ 8, -16 ≤ k ≤ 16, -15 ≤ l ≤ 15                                                                                            |
| Reflections collected                  | 12969                                                                                                                             |
| Independent reflections                | 4446 [ $R_{int} = 0.0493$ ]                                                                                                       |
| Completeness to $\theta = 26.44^\circ$ | 97.9 %                                                                                                                            |
| Absorption correction                  | empirical                                                                                                                         |
| Max. and min. transmission             | 0.7950 and 0.6161                                                                                                                 |
| Refinement method                      | Full-matrix least-squares on $F^2$                                                                                                |
| Data / restraints / parameters         | 4446 / 1 / 282                                                                                                                    |
| Goodness-of-fit on $F^2$               | 0.906                                                                                                                             |
| Final R indices [ $I > 2\sigma(I)$ ]   | $R_1 = 0.0360$ , $wR_2 = 0.0578$                                                                                                  |
| R indices (all data)                   | $R_1 = 0.0514$ , $wR_2 = 0.0627$                                                                                                  |
| Absolute structure parameter           | 0.000(7)                                                                                                                          |
| Largest diff. peak and hole            | 0.295 and -0.270 e <sup>-</sup> .Å <sup>-3</sup>                                                                                  |

Table 2. Atomic coordinates and equivalent isotropic displacement parameters ( $\text{\AA}^2$ ) for su032.  $U(\text{eq})$  is defined as one third of the trace of the orthogonalized  $U_{ij}$  tensor.

|        | x           | y           | z           | $U(\text{eq})$ |
|--------|-------------|-------------|-------------|----------------|
| Br(1)  | 0.68616(4)  | 0.39252(3)  | 1.46914(2)  | 0.027(1)       |
| O(1)   | 0.1761(4)   | 0.4901(2)   | 0.6345(2)   | 0.029(1)       |
| O(2)   | 0.2802(3)   | 0.54803(17) | 0.79734(17) | 0.026(1)       |
| O(3)   | 0.1793(3)   | 0.46063(16) | 0.99772(16) | 0.021(1)       |
| O(4)   | -0.0678(3)  | 0.3970(3)   | 1.08558(15) | 0.032(1)       |
| O(5)   | 0.5029(3)   | 0.3772(2)   | 0.79942(16) | 0.029(1)       |
| O(6)   | 0.2711(3)   | 0.28825(16) | 0.87739(17) | 0.021(1)       |
| C(1)   | 0.1830(5)   | 0.4543(2)   | 0.8125(3)   | 0.022(1)       |
| C(2)   | 0.0628(6)   | 0.4343(3)   | 0.7047(3)   | 0.023(1)       |
| C(3)   | 0.2548(6)   | 0.5792(3)   | 0.6879(3)   | 0.030(1)       |
| C(4)   | 0.0484(5)   | 0.4604(3)   | 0.9027(2)   | 0.026(1)       |
| C(5)   | 0.1002(5)   | 0.4232(2)   | 1.0836(3)   | 0.022(1)       |
| C(6)   | 0.2495(4)   | 0.4190(2)   | 1.1749(2)   | 0.017(1)       |
| C(7)   | 0.4482(5)   | 0.4395(2)   | 1.1661(3)   | 0.022(1)       |
| C(8)   | 0.5789(5)   | 0.4331(2)   | 1.2548(3)   | 0.022(1)       |
| C(9)   | 0.5070(4)   | 0.4061(3)   | 1.3490(2)   | 0.021(1)       |
| C(10)  | 0.3117(4)   | 0.3862(4)   | 1.3587(2)   | 0.023(1)       |
| C(11)  | 0.1827(4)   | 0.3928(4)   | 1.2707(2)   | 0.021(1)       |
| C(12)  | -0.0500(10) | 0.5691(6)   | 0.9001(5)   | 0.023(2)       |
| C(13)  | -0.2388(10) | 0.5765(5)   | 0.8793(5)   | 0.034(2)       |
| C(12A) | -0.1131(15) | 0.5352(8)   | 0.8981(7)   | 0.023(3)       |
| C(13A) | -0.0761(14) | 0.6301(8)   | 0.9278(7)   | 0.034(3)       |
| C(14)  | 0.3402(5)   | 0.3701(3)   | 0.8295(2)   | 0.022(1)       |
| C(15)  | 0.4008(5)   | 0.1989(2)   | 0.8847(3)   | 0.026(1)       |
| C(16)  | 0.5660(5)   | 0.2118(3)   | 0.9694(3)   | 0.036(1)       |
| C(17)  | 0.0434(6)   | 0.3248(3)   | 0.6702(3)   | 0.023(1)       |
| C(18)  | 0.1926(6)   | 0.2752(3)   | 0.6205(3)   | 0.023(1)       |
| C(19)  | 0.1718(5)   | 0.1737(3)   | 0.5902(3)   | 0.027(1)       |
| C(20)  | 0.0040(6)   | 0.1192(3)   | 0.6097(3)   | 0.030(1)       |
| C(21)  | -0.1434(5)  | 0.1673(3)   | 0.6609(3)   | 0.030(1)       |
| C(22)  | -0.1254(5)  | 0.2696(3)   | 0.6903(3)   | 0.026(1)       |
| C(23)  | 0.4533(6)   | 0.6030(3)   | 0.6484(3)   | 0.037(1)       |
| C(24)  | 0.1120(6)   | 0.6692(3)   | 0.6784(3)   | 0.036(1)       |
| H(2A)  | -0.0708     | 0.4659      | 0.7060      | 0.028          |
| H(4A)  | -0.0501     | 0.4033      | 0.9014      | 0.032          |
| H(7A)  | 0.4946      | 0.4576      | 1.1004      | 0.026          |
| H(8A)  | 0.7150      | 0.4471      | 1.2503      | 0.027          |
| H(10A) | 0.2657      | 0.3684      | 1.4246      | 0.027          |
| H(11A) | 0.0467      | 0.3791      | 1.2762      | 0.026          |
| H(12A) | 0.0274      | 0.6290      | 0.9136      | 0.027          |
| H(13A) | -0.3153     | 0.5163      | 0.8659      | 0.041          |

|        |         |        |        |       |
|--------|---------|--------|--------|-------|
| H(13B) | -0.3003 | 0.6420 | 0.8775 | 0.041 |
| H(12B) | -0.2426 | 0.5152 | 0.8740 | 0.027 |
| H(13C) | 0.0538  | 0.6495 | 0.9518 | 0.041 |
| H(13D) | -0.1791 | 0.6795 | 0.9253 | 0.041 |
| H(15A) | 0.4580  | 0.1881 | 0.8167 | 0.031 |
| H(15B) | 0.3229  | 0.1371 | 0.8999 | 0.031 |
| H(16A) | 0.6353  | 0.1463 | 0.9805 | 0.054 |
| H(16B) | 0.5109  | 0.2333 | 1.0345 | 0.054 |
| H(16C) | 0.6583  | 0.2642 | 0.9478 | 0.054 |
| H(18A) | 0.3093  | 0.3115 | 0.6074 | 0.028 |
| H(19A) | 0.2738  | 0.1411 | 0.5555 | 0.033 |
| H(20A) | -0.0102 | 0.0495 | 0.5883 | 0.036 |
| H(21A) | -0.2578 | 0.1299 | 0.6760 | 0.036 |
| H(22A) | -0.2283 | 0.3022 | 0.7242 | 0.031 |
| H(23A) | 0.5403  | 0.5435 | 0.6599 | 0.056 |
| H(23B) | 0.5109  | 0.6625 | 0.6862 | 0.056 |
| H(23C) | 0.4378  | 0.6186 | 0.5736 | 0.056 |
| H(24A) | -0.0175 | 0.6469 | 0.6985 | 0.054 |
| H(24B) | 0.1009  | 0.6937 | 0.6060 | 0.054 |
| H(24C) | 0.1608  | 0.7249 | 0.7247 | 0.054 |

Table 3. Anisotropic displacement parameters ( $\text{\AA}^2$ ) for su032.

The anisotropic displacement factor exponent takes the form:

$$-2\pi^2[h^2a^*^2U_{11} + \dots + 2hka^*b^*U_{12}]$$

|       | U <sub>11</sub> | U <sub>22</sub> | U <sub>33</sub> | U <sub>23</sub> | U <sub>13</sub> | U <sub>12</sub> |
|-------|-----------------|-----------------|-----------------|-----------------|-----------------|-----------------|
| Br(1) | 0.0301(2)       | 0.0298(2)       | 0.0195(2)       | 0.0005(2)       | -0.0056(1)      | 0.0026(2)       |
| O(1)  | 0.051(2)        | 0.0192(16)      | 0.0160(15)      | 0.0033(12)      | 0.0058(13)      | 0.0072(13)      |
| O(2)  | 0.0383(15)      | 0.0216(14)      | 0.0190(14)      | 0.0035(11)      | 0.0008(11)      | 0.0059(11)      |
| O(3)  | 0.0236(12)      | 0.0285(13)      | 0.0096(12)      | 0.0015(10)      | -0.0004(10)     | 0.0009(10)      |
| O(4)  | 0.0224(11)      | 0.0544(15)      | 0.0206(11)      | 0.0004(18)      | 0.0006(9)       | -0.0096(19)     |
| O(5)  | 0.0284(12)      | 0.0279(18)      | 0.0328(13)      | 0.0067(14)      | 0.0126(10)      | 0.0072(13)      |
| O(6)  | 0.0213(12)      | 0.0222(13)      | 0.0188(13)      | 0.0051(11)      | 0.0020(10)      | 0.0067(10)      |
| C(1)  | 0.0279(19)      | 0.023(2)        | 0.0159(19)      | 0.0028(15)      | 0.0015(16)      | 0.0088(16)      |
| C(2)  | 0.028(2)        | 0.028(2)        | 0.014(2)        | 0.0027(15)      | 0.0050(17)      | 0.0099(16)      |
| C(3)  | 0.046(2)        | 0.025(2)        | 0.019(2)        | 0.0041(16)      | 0.0043(18)      | 0.0077(18)      |
| C(4)  | 0.0218(18)      | 0.044(2)        | 0.0129(19)      | -0.0008(16)     | -0.0009(15)     | 0.0137(16)      |
| C(5)  | 0.0265(18)      | 0.024(2)        | 0.0159(18)      | -0.0025(14)     | 0.0020(15)      | -0.0037(14)     |
| C(6)  | 0.0219(16)      | 0.014(2)        | 0.0140(17)      | -0.0008(12)     | 0.0000(13)      | 0.0012(12)      |
| C(7)  | 0.0229(18)      | 0.0261(19)      | 0.0171(19)      | 0.0006(15)      | 0.0043(15)      | -0.0024(14)     |
| C(8)  | 0.0177(16)      | 0.026(2)        | 0.024(2)        | 0.0020(14)      | 0.0025(15)      | -0.0012(13)     |
| C(9)  | 0.0250(16)      | 0.019(2)        | 0.0177(16)      | -0.0008(18)     | -0.0028(13)     | 0.0019(18)      |
| C(10) | 0.0270(15)      | 0.0259(18)      | 0.0152(15)      | 0.004(2)        | 0.0049(12)      | 0.002(2)        |
| C(11) | 0.0205(14)      | 0.0223(16)      | 0.0217(16)      | 0.007(2)        | 0.0036(12)      | 0.004(2)        |
| C(14) | 0.0294(18)      | 0.021(3)        | 0.0152(17)      | 0.0024(15)      | 0.0040(15)      | 0.0057(16)      |
| C(15) | 0.032(2)        | 0.017(2)        | 0.030(2)        | 0.0044(16)      | 0.0015(17)      | 0.0101(15)      |
| C(16) | 0.026(2)        | 0.030(2)        | 0.051(3)        | 0.0115(19)      | -0.0050(19)     | 0.0034(17)      |
| C(17) | 0.031(2)        | 0.028(2)        | 0.009(2)        | 0.0050(16)      | 0.0007(17)      | 0.0115(18)      |
| C(18) | 0.027(2)        | 0.024(2)        | 0.019(2)        | 0.0026(18)      | 0.0035(17)      | 0.0034(17)      |
| C(19) | 0.032(2)        | 0.031(2)        | 0.020(2)        | 0.0018(17)      | 0.0109(17)      | 0.0088(17)      |
| C(20) | 0.042(2)        | 0.024(2)        | 0.024(2)        | 0.0011(17)      | 0.0028(18)      | 0.0049(18)      |
| C(21) | 0.029(2)        | 0.034(2)        | 0.026(2)        | 0.0039(18)      | 0.0039(17)      | 0.0038(17)      |
| C(22) | 0.0260(19)      | 0.035(2)        | 0.018(2)        | 0.0026(17)      | 0.0029(16)      | 0.0122(17)      |
| C(23) | 0.053(3)        | 0.027(2)        | 0.034(2)        | 0.0088(18)      | 0.014(2)        | 0.0082(19)      |
| C(24) | 0.053(3)        | 0.025(2)        | 0.030(2)        | 0.0064(18)      | 0.000(2)        | 0.0119(19)      |

Table 4. Bond lengths [ $\text{\AA}$ ] for su032.

| atom-atom     | distance  | atom-atom     | distance |
|---------------|-----------|---------------|----------|
| Br(1)-C(9)    | 1.906(3)  | O(1)-C(2)     | 1.425(4) |
| O(1)-C(3)     | 1.432(4)  | O(2)-C(1)     | 1.408(4) |
| O(2)-C(3)     | 1.460(4)  | O(3)-C(5)     | 1.350(4) |
| O(3)-C(4)     | 1.459(3)  | O(4)-C(5)     | 1.196(4) |
| O(5)-C(14)    | 1.202(4)  | O(6)-C(14)    | 1.332(4) |
| O(6)-C(15)    | 1.459(4)  | C(1)-C(4)     | 1.527(4) |
| C(1)-C(14)    | 1.536(4)  | C(1)-C(2)     | 1.578(5) |
| C(2)-C(17)    | 1.495(5)  | C(2)-H(2A)    | 1.0000   |
| C(3)-C(23)    | 1.508(5)  | C(3)-C(24)    | 1.521(5) |
| C(4)-C(12A)   | 1.467(11) | C(4)-C(12)    | 1.565(8) |
| C(4)-H(4A)    | 1.0000    | C(5)-C(6)     | 1.498(4) |
| C(6)-C(11)    | 1.383(4)  | C(6)-C(7)     | 1.391(4) |
| C(7)-C(8)     | 1.398(4)  | C(7)-H(7A)    | 0.9500   |
| C(8)-C(9)     | 1.380(4)  | C(8)-H(8A)    | 0.9500   |
| C(9)-C(10)    | 1.370(4)  | C(10)-C(11)   | 1.384(3) |
| C(10)-H(10A)  | 0.9500    | C(11)-H(11A)  | 0.9500   |
| C(12)-C(13)   | 1.298(10) | C(12)-H(12A)  | 0.9500   |
| C(13)-H(13A)  | 0.9500    | C(13)-H(13B)  | 0.9500   |
| C(12A)-C(13A) | 1.312(15) | C(12A)-H(12B) | 0.9500   |
| C(13A)-H(13C) | 0.9500    | C(13A)-H(13D) | 0.9500   |
| C(15)-C(16)   | 1.517(4)  | C(15)-H(15A)  | 0.9900   |
| C(15)-H(15B)  | 0.9900    | C(16)-H(16A)  | 0.9800   |
| C(16)-H(16B)  | 0.9800    | C(16)-H(16C)  | 0.9800   |
| C(17)-C(22)   | 1.394(5)  | C(17)-C(18)   | 1.395(5) |
| C(18)-C(19)   | 1.381(5)  | C(18)-H(18A)  | 0.9500   |
| C(19)-C(20)   | 1.383(5)  | C(19)-H(19A)  | 0.9500   |
| C(20)-C(21)   | 1.387(5)  | C(20)-H(20A)  | 0.9500   |
| C(21)-C(22)   | 1.387(5)  | C(21)-H(21A)  | 0.9500   |
| C(22)-H(22A)  | 0.9500    | C(23)-H(23A)  | 0.9800   |
| C(23)-H(23B)  | 0.9800    | C(23)-H(23C)  | 0.9800   |
| C(24)-H(24A)  | 0.9800    | C(24)-H(24B)  | 0.9800   |
| C(24)-H(24C)  | 0.9800    |               |          |

Symmetry transformations used to generate equivalent atoms:

Table 5. Bond angles [°] for su032.

| atom-atom-atom       | angle    | atom-atom-atom       | angle    |
|----------------------|----------|----------------------|----------|
| C(2)-O(1)-C(3)       | 108.1(3) | C(1)-O(2)-C(3)       | 110.4(2) |
| C(5)-O(3)-C(4)       | 115.2(2) | C(14)-O(6)-C(15)     | 115.8(3) |
| O(2)-C(1)-C(4)       | 111.8(3) | O(2)-C(1)-C(14)      | 107.9(3) |
| C(4)-C(1)-C(14)      | 112.3(3) | O(2)-C(1)-C(2)       | 104.0(3) |
| C(4)-C(1)-C(2)       | 111.8(3) | C(14)-C(1)-C(2)      | 108.7(3) |
| O(1)-C(2)-C(17)      | 109.9(3) | O(1)-C(2)-C(1)       | 101.5(3) |
| C(17)-C(2)-C(1)      | 116.5(3) | O(1)-C(2)-H(2A)      | 109.5    |
| C(17)-C(2)-H(2A)     | 109.5    | C(1)-C(2)-H(2A)      | 109.5    |
| O(1)-C(3)-O(2)       | 104.5(3) | O(1)-C(3)-C(23)      | 108.7(3) |
| O(2)-C(3)-C(23)      | 109.3(3) | O(1)-C(3)-C(24)      | 111.7(3) |
| O(2)-C(3)-C(24)      | 108.8(3) | C(23)-C(3)-C(24)     | 113.4(3) |
| O(3)-C(4)-C(12A)     | 116.4(4) | O(3)-C(4)-C(1)       | 105.6(3) |
| C(12A)-C(4)-C(1)     | 119.5(4) | O(3)-C(4)-C(12)      | 104.6(3) |
| C(12A)-C(4)-C(12)    | 23.1(4)  | C(1)-C(4)-C(12)      | 108.0(3) |
| O(3)-C(4)-H(4A)      | 112.7    | C(12A)-C(4)-H(4A)    | 89.5     |
| C(1)-C(4)-H(4A)      | 112.7    | C(12)-C(4)-H(4A)     | 112.7    |
| O(4)-C(5)-O(3)       | 123.9(3) | O(4)-C(5)-C(6)       | 124.8(3) |
| O(3)-C(5)-C(6)       | 111.3(3) | C(11)-C(6)-C(7)      | 120.1(3) |
| C(11)-C(6)-C(5)      | 117.1(3) | C(7)-C(6)-C(5)       | 122.7(3) |
| C(6)-C(7)-C(8)       | 119.4(3) | C(6)-C(7)-H(7A)      | 120.3    |
| C(8)-C(7)-H(7A)      | 120.3    | C(9)-C(8)-C(7)       | 118.9(3) |
| C(9)-C(8)-H(8A)      | 120.5    | C(7)-C(8)-H(8A)      | 120.5    |
| C(10)-C(9)-C(8)      | 122.3(3) | C(10)-C(9)-Br(1)     | 118.7(2) |
| C(8)-C(9)-Br(1)      | 119.0(2) | C(9)-C(10)-C(11)     | 118.7(3) |
| C(9)-C(10)-H(10A)    | 120.7    | C(11)-C(10)-H(10A)   | 120.7    |
| C(6)-C(11)-C(10)     | 120.7(3) | C(6)-C(11)-H(11A)    | 119.7    |
| C(10)-C(11)-H(11A)   | 119.7    | C(13)-C(12)-C(4)     | 119.1(7) |
| C(13)-C(12)-H(12A)   | 120.4    | C(4)-C(12)-H(12A)    | 120.4    |
| C(12)-C(13)-H(13A)   | 120.0    | C(12)-C(13)-H(13B)   | 120.0    |
| H(13A)-C(13)-H(13B)  | 120.0    | C(13A)-C(12A)-C(4)   | 119.0(9) |
| C(13A)-C(12A)-H(12B) | 120.5    | C(4)-C(12A)-H(12B)   | 120.5    |
| C(12A)-C(13A)-H(13C) | 120.0    | C(12A)-C(13A)-H(13D) | 120.0    |
| H(13C)-C(13A)-H(13D) | 120.0    | O(5)-C(14)-O(6)      | 124.9(3) |
| O(5)-C(14)-C(1)      | 123.3(3) | O(6)-C(14)-C(1)      | 111.7(3) |
| O(6)-C(15)-C(16)     | 111.9(3) | O(6)-C(15)-H(15A)    | 109.2    |
| C(16)-C(15)-H(15A)   | 109.2    | O(6)-C(15)-H(15B)    | 109.2    |
| C(16)-C(15)-H(15B)   | 109.2    | H(15A)-C(15)-H(15B)  | 107.9    |
| C(15)-C(16)-H(16A)   | 109.5    | C(15)-C(16)-H(16B)   | 109.5    |
| H(16A)-C(16)-H(16B)  | 109.5    | C(15)-C(16)-H(16C)   | 109.5    |
| H(16A)-C(16)-H(16C)  | 109.5    | H(16B)-C(16)-H(16C)  | 109.5    |
| C(22)-C(17)-C(18)    | 118.9(4) | C(22)-C(17)-C(2)     | 119.5(3) |
| C(18)-C(17)-C(2)     | 121.6(4) | C(19)-C(18)-C(17)    | 120.5(4) |



|                     |          |                     |          |
|---------------------|----------|---------------------|----------|
| C(19)-C(18)-H(18A)  | 119.7    | C(17)-C(18)-H(18A)  | 119.7    |
| C(18)-C(19)-C(20)   | 120.6(3) | C(18)-C(19)-H(19A)  | 119.7    |
| C(20)-C(19)-H(19A)  | 119.7    | C(19)-C(20)-C(21)   | 119.3(3) |
| C(19)-C(20)-H(20A)  | 120.4    | C(21)-C(20)-H(20A)  | 120.4    |
| C(22)-C(21)-C(20)   | 120.6(3) | C(22)-C(21)-H(21A)  | 119.7    |
| C(20)-C(21)-H(21A)  | 119.7    | C(21)-C(22)-C(17)   | 120.2(3) |
| C(21)-C(22)-H(22A)  | 119.9    | C(17)-C(22)-H(22A)  | 119.9    |
| C(3)-C(23)-H(23A)   | 109.5    | C(3)-C(23)-H(23B)   | 109.5    |
| H(23A)-C(23)-H(23B) | 109.5    | C(3)-C(23)-H(23C)   | 109.5    |
| H(23A)-C(23)-H(23C) | 109.5    | H(23B)-C(23)-H(23C) | 109.5    |
| C(3)-C(24)-H(24A)   | 109.5    | C(3)-C(24)-H(24B)   | 109.5    |
| H(24A)-C(24)-H(24B) | 109.5    | C(3)-C(24)-H(24C)   | 109.5    |
| H(24A)-C(24)-H(24C) | 109.5    | H(24B)-C(24)-H(24C) | 109.5    |

Symmetry transformations used to generate equivalent atoms:

Table 6. Torsion angles [°] for su032.

| atom-atom-atom-atom      | angle     | atom-atom-atom-atom     | angle     |
|--------------------------|-----------|-------------------------|-----------|
| C(3)-O(2)-C(1)-C(4)      | -129.0(3) | C(3)-O(2)-C(1)-C(14)    | 107.1(3)  |
| C(3)-O(2)-C(1)-C(2)      | -8.2(3)   | C(3)-O(1)-C(2)-C(17)    | -158.2(3) |
| C(3)-O(1)-C(2)-C(1)      | -34.4(3)  | O(2)-C(1)-C(2)-O(1)     | 25.6(3)   |
| C(4)-C(1)-C(2)-O(1)      | 146.4(3)  | C(14)-C(1)-C(2)-O(1)    | -89.2(3)  |
| O(2)-C(1)-C(2)-C(17)     | 144.9(3)  | C(4)-C(1)-C(2)-C(17)    | -94.4(4)  |
| C(14)-C(1)-C(2)-C(17)    | 30.1(5)   | C(2)-O(1)-C(3)-O(2)     | 30.3(4)   |
| C(2)-O(1)-C(3)-C(23)     | 146.9(3)  | C(2)-O(1)-C(3)-C(24)    | -87.2(3)  |
| C(1)-O(2)-C(3)-O(1)      | -12.3(3)  | C(1)-O(2)-C(3)-C(23)    | -128.4(3) |
| C(1)-O(2)-C(3)-C(24)     | 107.1(3)  | C(5)-O(3)-C(4)-C(12A)   | 71.4(6)   |
| C(5)-O(3)-C(4)-C(1)      | -153.4(3) | C(5)-O(3)-C(4)-C(12)    | 92.7(4)   |
| O(2)-C(1)-C(4)-O(3)      | -73.6(3)  | C(14)-C(1)-C(4)-O(3)    | 47.8(4)   |
| C(2)-C(1)-C(4)-O(3)      | 170.3(3)  | O(2)-C(1)-C(4)-C(12A)   | 59.9(6)   |
| C(14)-C(1)-C(4)-C(12A)   | -178.6(5) | C(2)-C(1)-C(4)-C(12A)   | -56.2(6)  |
| O(2)-C(1)-C(4)-C(12)     | 37.9(4)   | C(14)-C(1)-C(4)-C(12)   | 159.3(4)  |
| C(2)-C(1)-C(4)-C(12)     | -78.3(4)  | C(4)-O(3)-C(5)-O(4)     | -4.3(5)   |
| C(4)-O(3)-C(5)-C(6)      | 175.6(2)  | O(4)-C(5)-C(6)-C(11)    | -6.9(5)   |
| O(3)-C(5)-C(6)-C(11)     | 173.1(3)  | O(4)-C(5)-C(6)-C(7)     | 172.6(4)  |
| O(3)-C(5)-C(6)-C(7)      | -7.3(4)   | C(11)-C(6)-C(7)-C(8)    | 0.1(5)    |
| C(5)-C(6)-C(7)-C(8)      | -179.5(3) | C(6)-C(7)-C(8)-C(9)     | 0.3(5)    |
| C(7)-C(8)-C(9)-C(10)     | -0.6(6)   | C(7)-C(8)-C(9)-Br(1)    | 177.8(2)  |
| C(8)-C(9)-C(10)-C(11)    | 0.5(7)    | Br(1)-C(9)-C(10)-C(11)  | -177.9(4) |
| C(7)-C(6)-C(11)-C(10)    | -0.2(6)   | C(5)-C(6)-C(11)-C(10)   | 179.4(4)  |
| C(9)-C(10)-C(11)-C(6)    | -0.1(7)   | O(3)-C(4)-C(12)-C(13)   | -134.0(5) |
| C(12A)-C(4)-C(12)-C(13)  | -9.9(10)  | C(1)-C(4)-C(12)-C(13)   | 113.8(6)  |
| O(3)-C(4)-C(12A)-C(13A)  | 45.0(10)  | C(1)-C(4)-C(12A)-C(13A) | -83.8(9)  |
| C(12)-C(4)-C(12A)-C(13A) | -18.4(9)  | C(15)-O(6)-C(14)-O(5)   | -5.3(5)   |
| C(15)-O(6)-C(14)-C(1)    | 172.2(2)  | O(2)-C(1)-C(14)-O(5)    | -23.0(4)  |
| C(4)-C(1)-C(14)-O(5)     | -146.7(3) | C(2)-C(1)-C(14)-O(5)    | 89.2(4)   |
| O(2)-C(1)-C(14)-O(6)     | 159.4(2)  | C(4)-C(1)-C(14)-O(6)    | 35.7(4)   |
| C(2)-C(1)-C(14)-O(6)     | -88.4(3)  | C(14)-O(6)-C(15)-C(16)  | 76.9(4)   |
| O(1)-C(2)-C(17)-C(22)    | -149.0(3) | C(1)-C(2)-C(17)-C(22)   | 96.4(4)   |
| O(1)-C(2)-C(17)-C(18)    | 32.7(5)   | C(1)-C(2)-C(17)-C(18)   | -82.0(4)  |
| C(22)-C(17)-C(18)-C(19)  | 1.1(6)    | C(2)-C(17)-C(18)-C(19)  | 179.5(3)  |
| C(17)-C(18)-C(19)-C(20)  | -0.8(6)   | C(18)-C(19)-C(20)-C(21) | -0.4(5)   |
| C(19)-C(20)-C(21)-C(22)  | 1.4(5)    | C(20)-C(21)-C(22)-C(17) | -1.2(5)   |
| C(18)-C(17)-C(22)-C(21)  | -0.1(5)   | C(2)-C(17)-C(22)-C(21)  | -178.5(3) |

Symmetry transformations used to generate equivalent atoms:

# checkCIF/PLATON report

No syntax errors found. CIF dictionary Interpreting this report

## Datablock: su032

---

Bond precision: C-C = 0.0051 A Wavelength=0.71073  
Cell: a=6.8101(6) b=13.0126(10) c=12.828(1)  
alpha=90 beta=93.991(2) gamma=90  
Temperature: 100 K

|                | Calculated    | Reported      |
|----------------|---------------|---------------|
| Volume         | 1134.02(16)   | 1134.02(16)   |
| Space group    | P 21          | P21           |
| Hall group     | P 2yb         | P 2yb         |
| Moiety formula | C24 H25 Br O6 | C24 H25 Br O6 |
| Sum formula    | C24 H25 Br O6 | C24 H25 Br O6 |
| Mr             | 489.34        | 489.35        |
| Dx,g cm-3      | 1.433         | 1.433         |
| Z              | 2             | 2             |
| Mu (mm-1)      | 1.849         | 1.849         |
| F000           | 504.0         | 504.0         |
| F000'          | 503.67        |               |
| h,k,lmax       | 8,16,16       | 8,16,15       |
| Nref           | 2448[ 4680]   | 4446          |
| Tmin,Tmax      | 0.708,0.786   | 0.616,0.795   |
| Tmin'          | 0.579         |               |

Correction method= EMPIRICAL

Data completeness= 1.82/0.95 Theta(max)= 26.440

R(reflections)= 0.0360( 3643) wR2(reflections)= 0.0627( 4446)

S = 0.906 Npar= 282

---

The following ALERTS were generated. Each ALERT has the format  
**test-name\_ALERT\_alert-type\_alert-level.**  
Click on the hyperlinks for more details of the test.

---

### Alert level B

PLAT201\_ALERT\_2\_B Isotropic non-H Atoms in Main Residue(s) ..... 2

---

### Alert level C

PLAT029\_ALERT\_3\_C \_diffn\_measured\_fraction\_theta\_full Low ..... 0.98

---

## Alert level G

REFLT03\_ALERT\_4\_G Please check that the estimate of the number of Friedel pairs is correct. If it is not, please give the correct count in the \_publ\_section\_exptl\_refinement section of the submitted CIF.

|                                               |         |
|-----------------------------------------------|---------|
| From the CIF: _diffrn_reflths_theta_max       | 26.44   |
| From the CIF: _reflths_number_total           | 4446    |
| Count of symmetry unique reflths              | 2448    |
| Completeness (_total/calc)                    | 181.62% |
| TEST3: Check Friedels for noncentro structure |         |
| Estimate of Friedel pairs measured            | 1998    |
| Fraction of Friedel pairs measured            | 0.816   |
| Are heavy atom types Z>Si present             | yes     |

PLAT301\_ALERT\_3\_G Note: Main Residue Disorder ..... 6.00 Perc.  
PLAT779\_ALERT\_4\_G Suspect or Irrelevant (Bond) Angle in CIF ..... 23.10 Deg.  
C12A -C4 -C12 1.555 1.555 1.555

PLAT791\_ALERT\_4\_G Note: The Model has Chirality at C1 (Verify) R  
PLAT791\_ALERT\_4\_G Note: The Model has Chirality at C2 (Verify) S  
PLAT850\_ALERT\_4\_G Check Flack Parameter Exact Value 0.00 and su .. 0.01

---

0 **ALERT level A** = In general: serious problem  
1 **ALERT level B** = Potentially serious problem  
1 **ALERT level C** = Check and explain  
6 **ALERT level G** = General alerts; check

0 ALERT type 1 CIF construction/syntax error, inconsistent or missing data  
1 ALERT type 2 Indicator that the structure model may be wrong or deficient  
2 ALERT type 3 Indicator that the structure quality may be low  
5 ALERT type 4 Improvement, methodology, query or suggestion  
0 ALERT type 5 Informative message, check

---

## Publication of your CIF in IUCr journals

A basic structural check has been run on your CIF. These basic checks will be run on all CIFs submitted for publication in IUCr journals (*Acta Crystallographica*, *Journal of Applied Crystallography*, *Journal of Synchrotron Radiation*); however, if you intend to submit to *Acta Crystallographica Section C* or *E*, you should make sure that full publication checks are run on the final version of your CIF prior to submission.

## Publication of your CIF in other journals

Please refer to the *Notes for Authors* of the relevant journal for any special instructions relating to CIF submission.

---

PLATON version of 31/03/2010; check.def file version of 22/03/2010

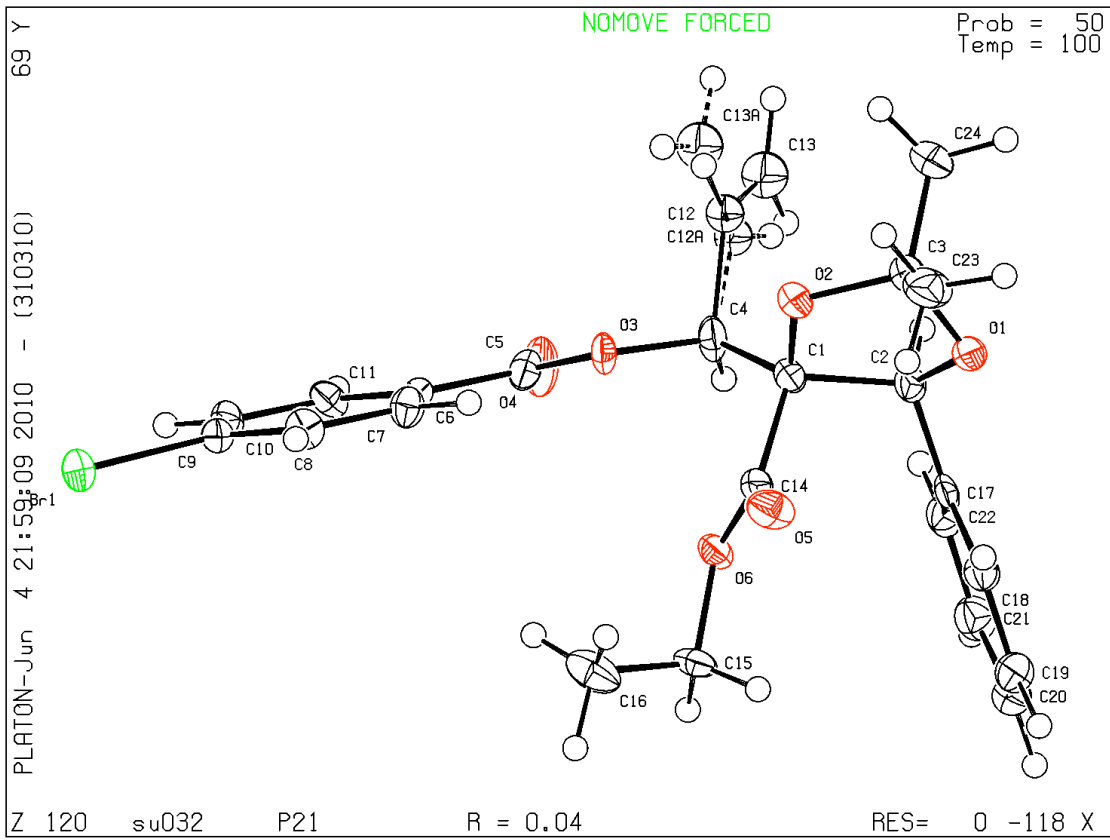

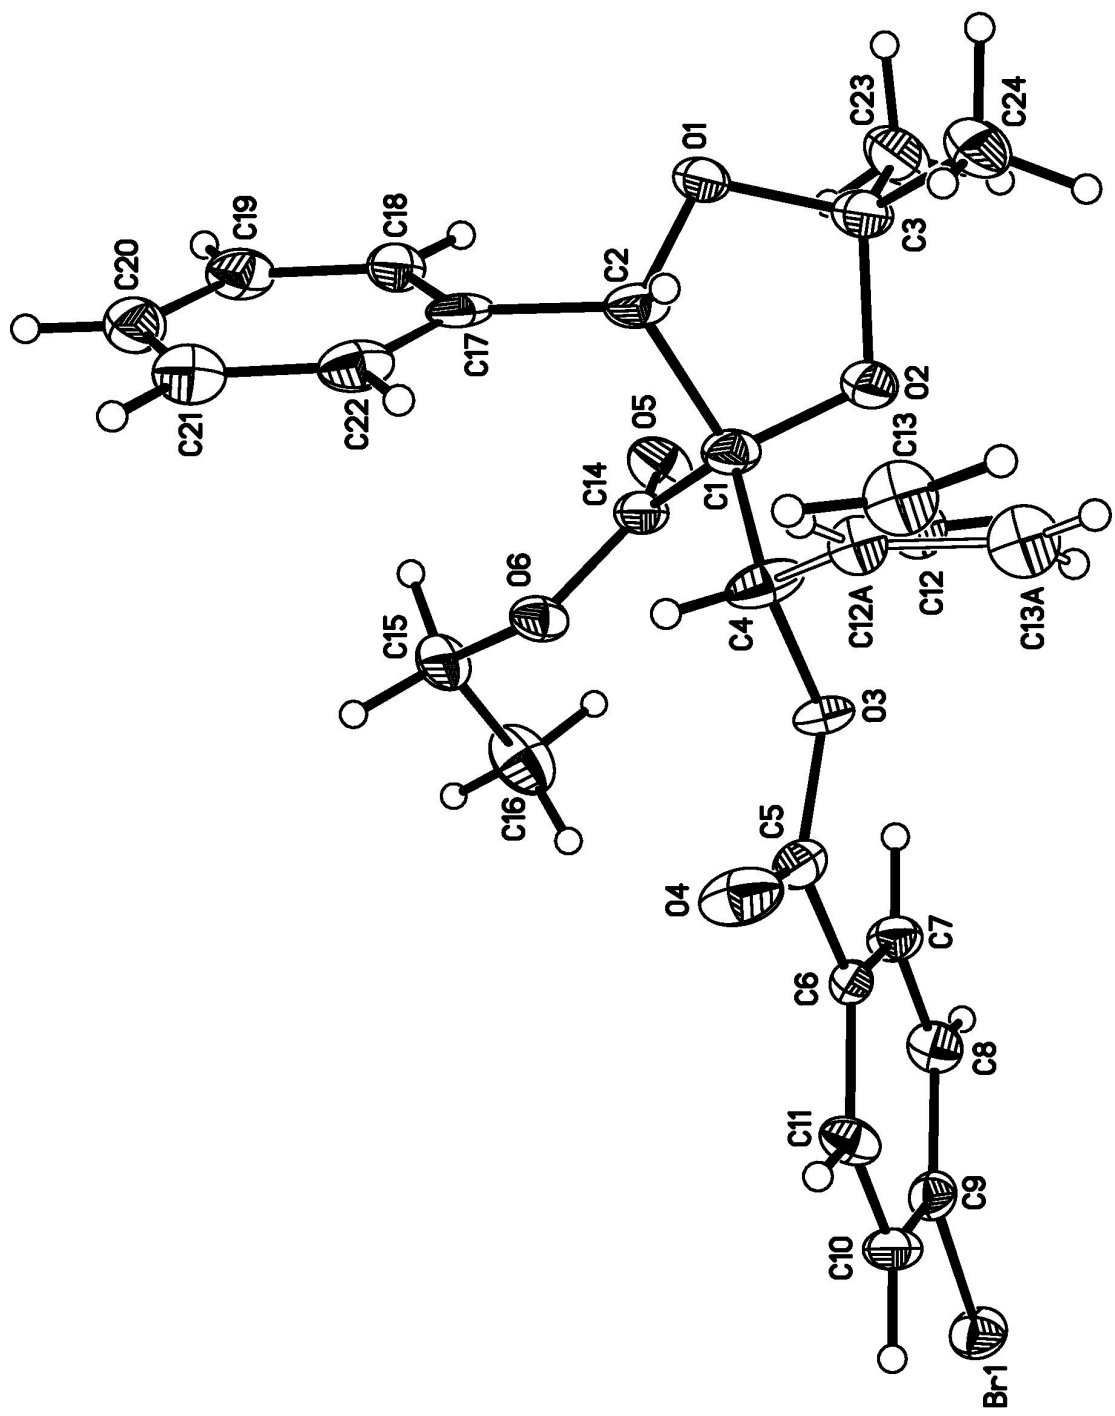

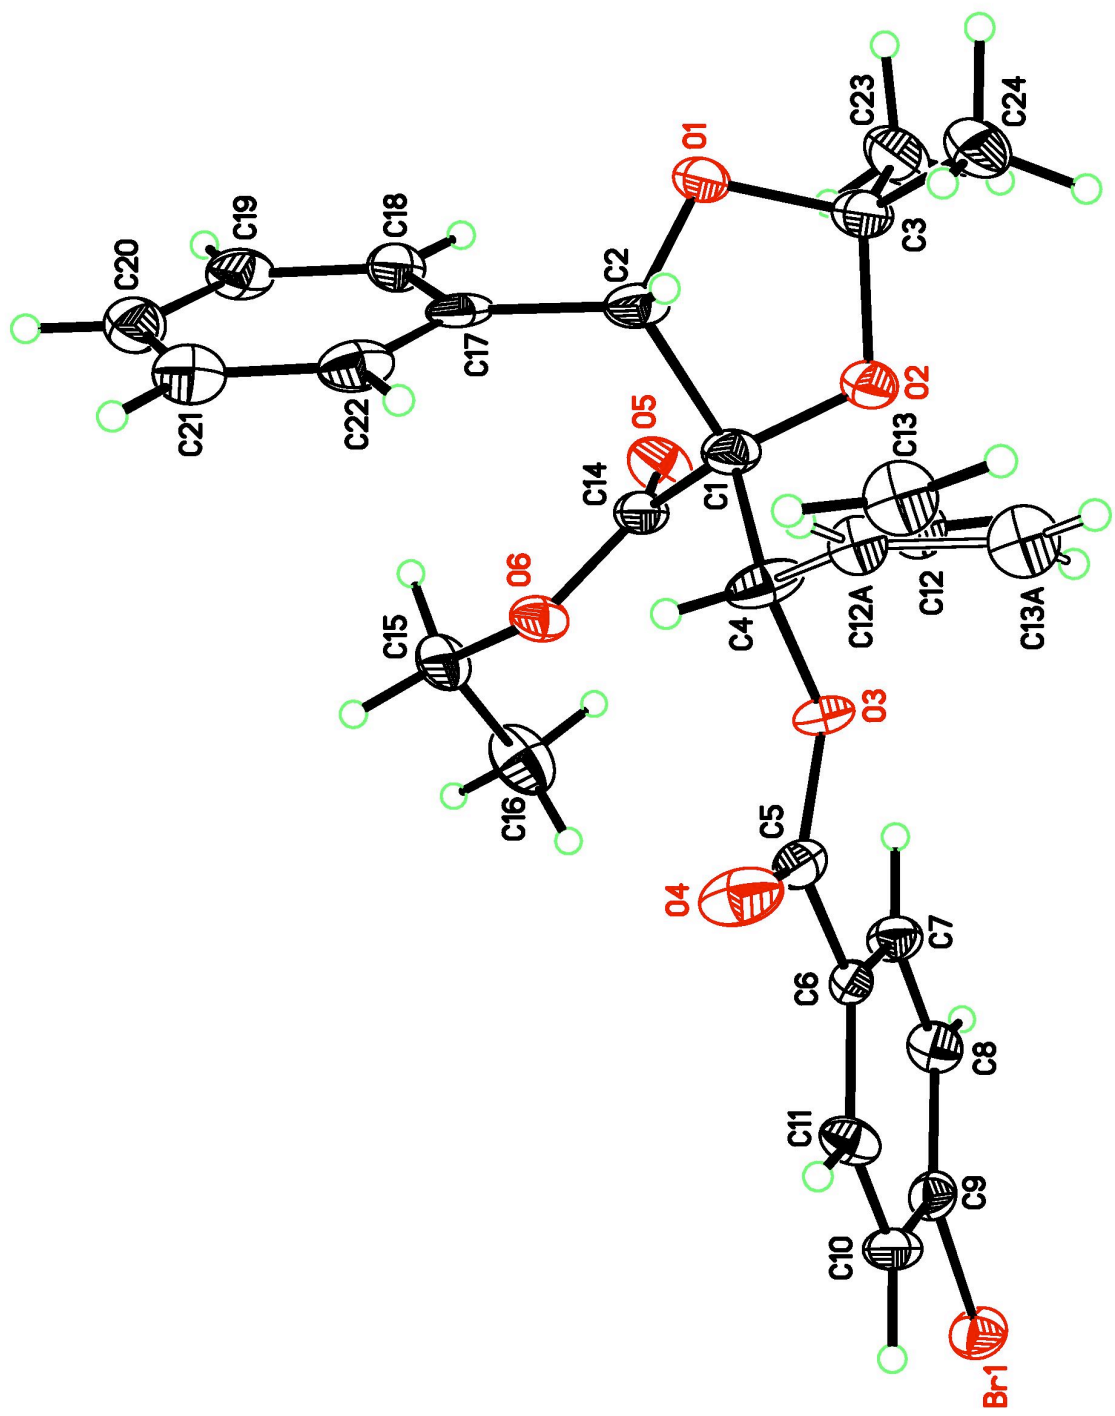

Supplement: NIHMS339915-supplement-3_si_003.pdf [file NIHMS339915-supplement-3_si_003.pdf]
